# Supplementary material for: Anion recognition using meta-substituted ureidocalix[4]arene receptors
Source: Royal Society of Chemistry journal article supplement (doi:10.1039/d4ob01441c), 2024-01-01
Supplement: d4ob01441c1.pdf [file d4ob01441c1.pdf]

## Supporting Information

# Anion Recognition Using meta-Substituted Ureidocalix[4]arene Receptors

A. Surina,<sup>a</sup> J. Čejka,<sup>b</sup> K. Salvadori,<sup>c,d</sup> and P. Lhoták<sup>a\*</sup>

<sup>a</sup>Department of Organic Chemistry, University of Chemistry and Technology, Prague (UCTP), Technická 5, 166 28 Prague 6, Czech Republic. E-mail: [lhotakp@vscht.cz](mailto:lhotakp@vscht.cz); Fax: +420-220444288; Tel: +420-220445055.

<sup>b</sup>Department of Solid State Chemistry, UCTP, 166 28 Prague 6, Czech Republic.

<sup>c</sup>Institute of chemical process fundamentals of Czech Academy of Sciences v.v.i., Rozvojová 135, Prague 6, 16502, Czech Republic.

<sup>d</sup>J. Heyrovský Institute of Physical Chemistry of Czech Academy of Sciences v.v.i., Dolejšková 2155/3, 182 23 Prague 8, Czech Republic.

## Table of Contents

|                                                            |    |
|------------------------------------------------------------|----|
| 1. Spectral characterization of compounds .....            | 2  |
| 2. Association constants $K_{As}$ .....                    | 20 |
| 3. Dilution study of nitro-substituted ureas in DMSO ..... | 21 |
| 4. Job plot analysis .....                                 | 24 |
| 5. Titration experiments .....                             | 25 |
| 6. Electrochemistry .....                                  | 41 |
| 7. Crystallographic data .....                             | 55 |

# 1. Spectral characterization of compounds

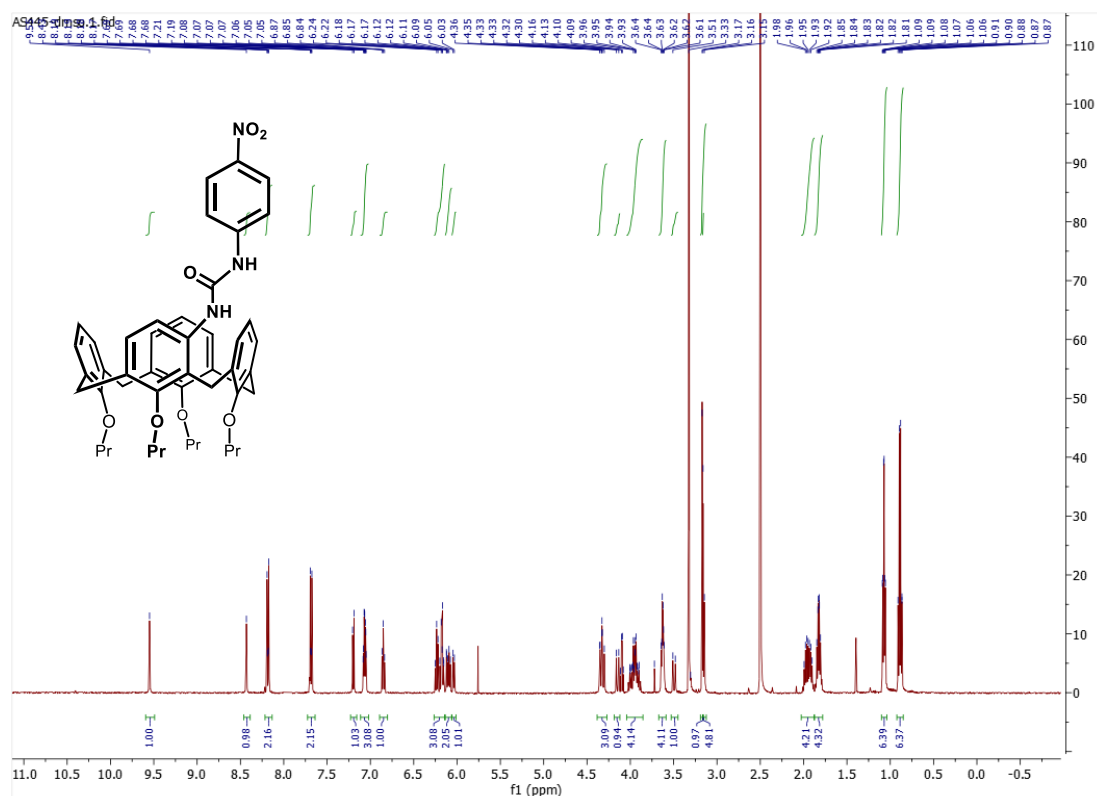

Fig. S1:  $^1\text{H}$  NMR of compound **3a** (DMSO, 500 MHz, 298 K)

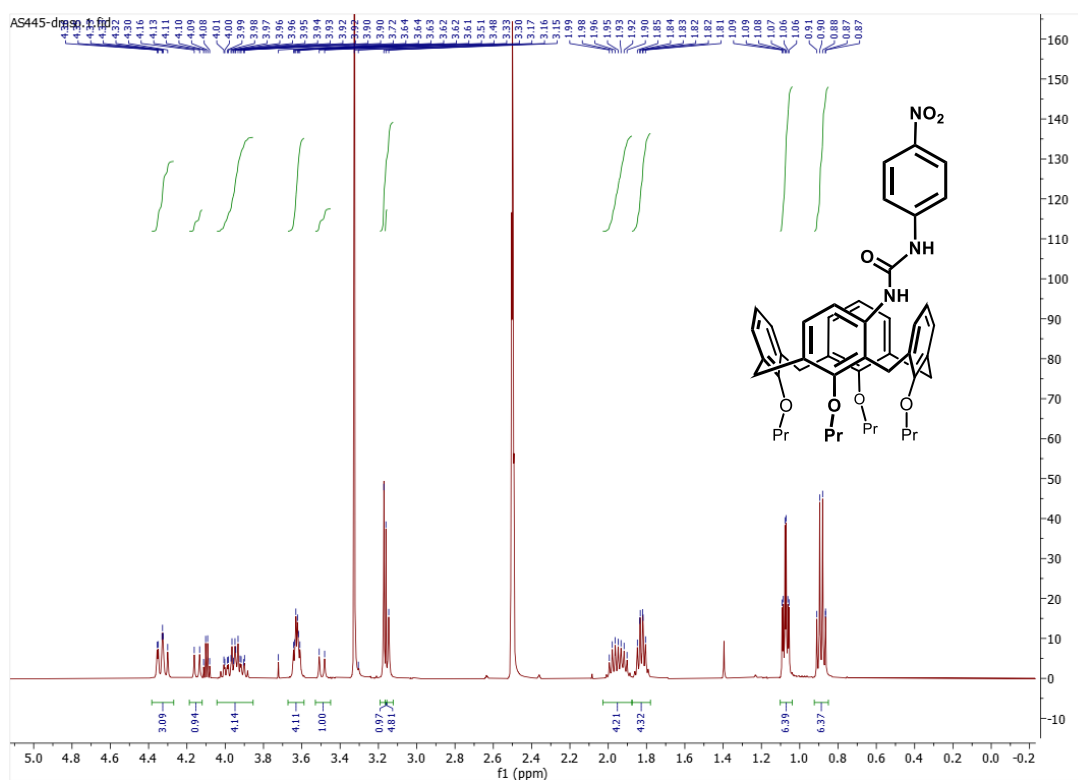

Fig. S2:  $^1\text{H}$  NMR of compound **3a**, aliphatic region (DMSO, 500 MHz, 298 K)

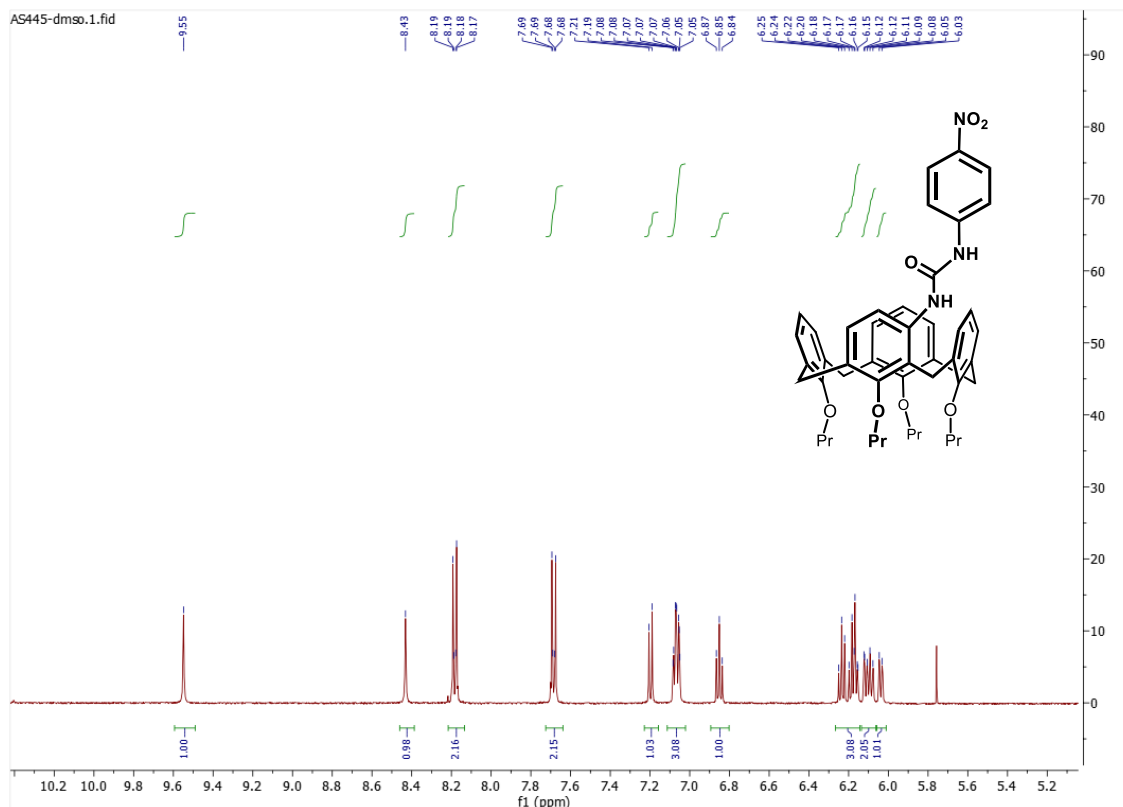

**Fig. S3:**  $^1\text{H}$  NMR of compound **3a**, aromatic region (DMSO, 500 MHz, 298 K)

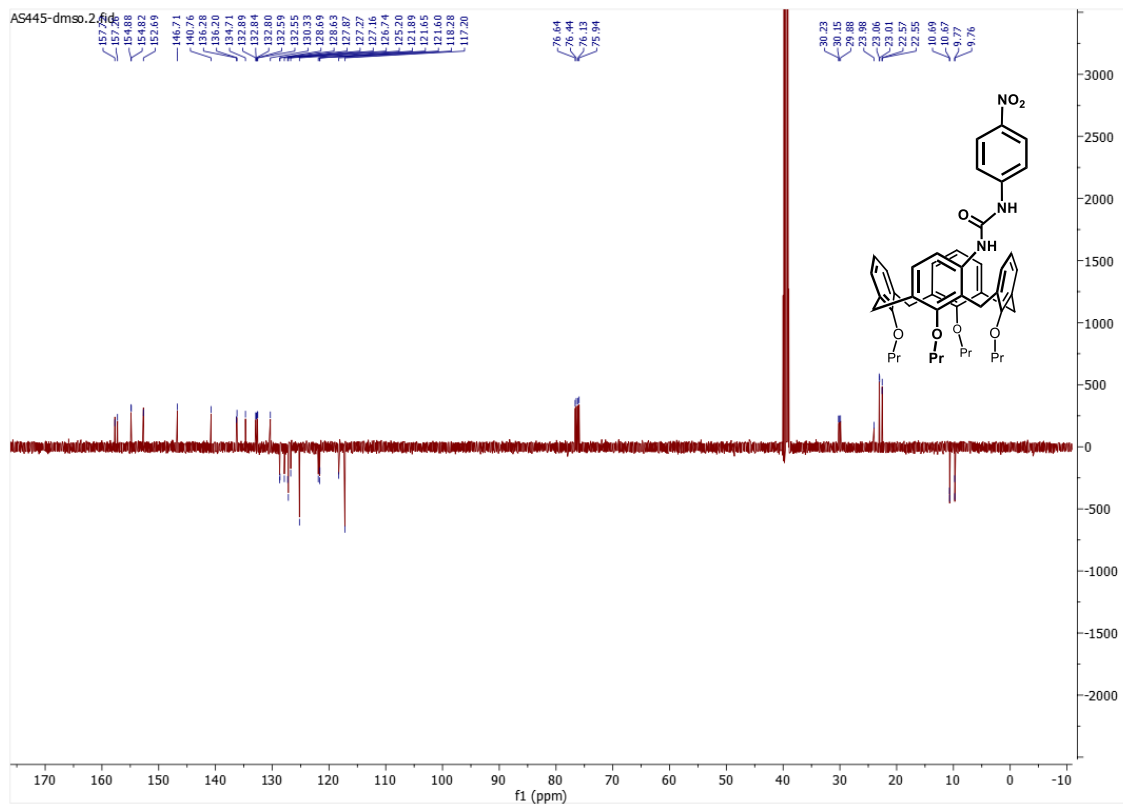

**Fig. S4:**  $^{13}\text{C}$ (APT) NMR of compound **3a** (DMSO, 125 MHz, 298 K)

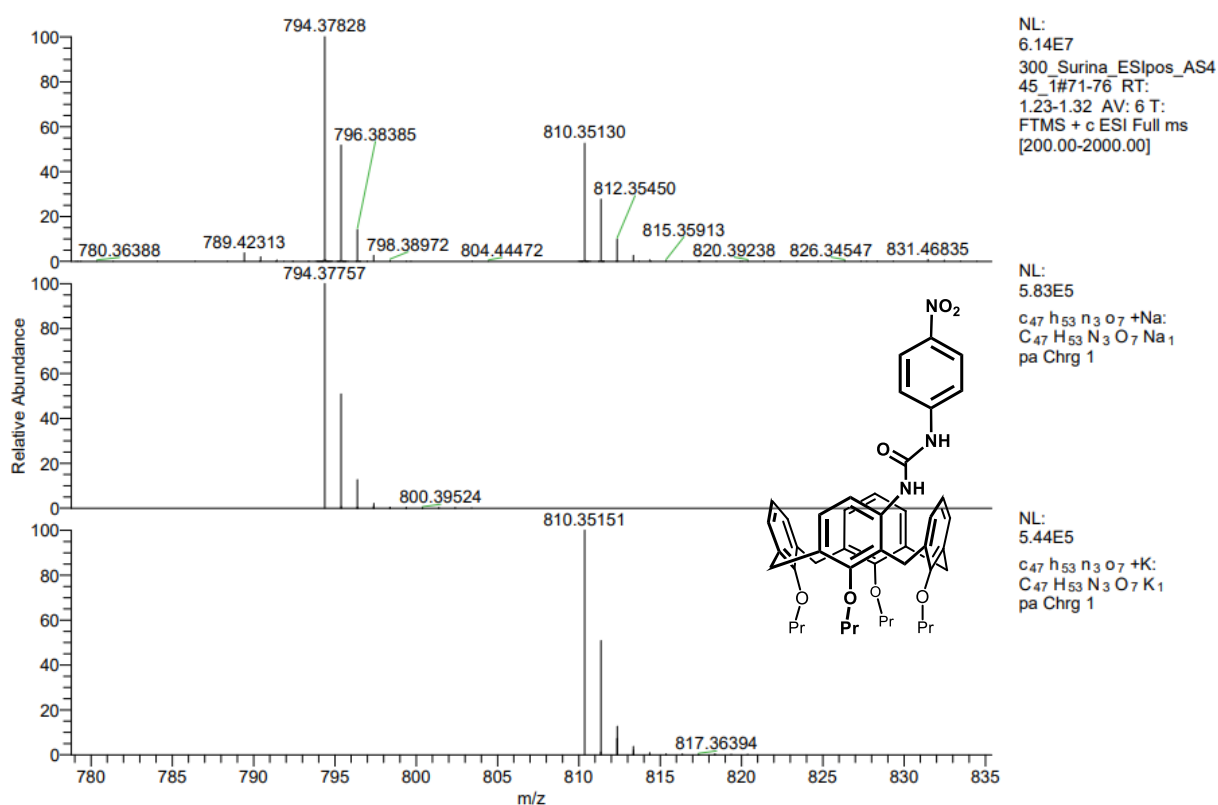

**Fig. S5:** HRMS (ESI) of compound **3a** calcd for  $C_{47}H_{53}N_3O_7$  794.3776  $[M+Na]^+$ , found  $m/z$  794.3783  $[M+Na]^+$ .

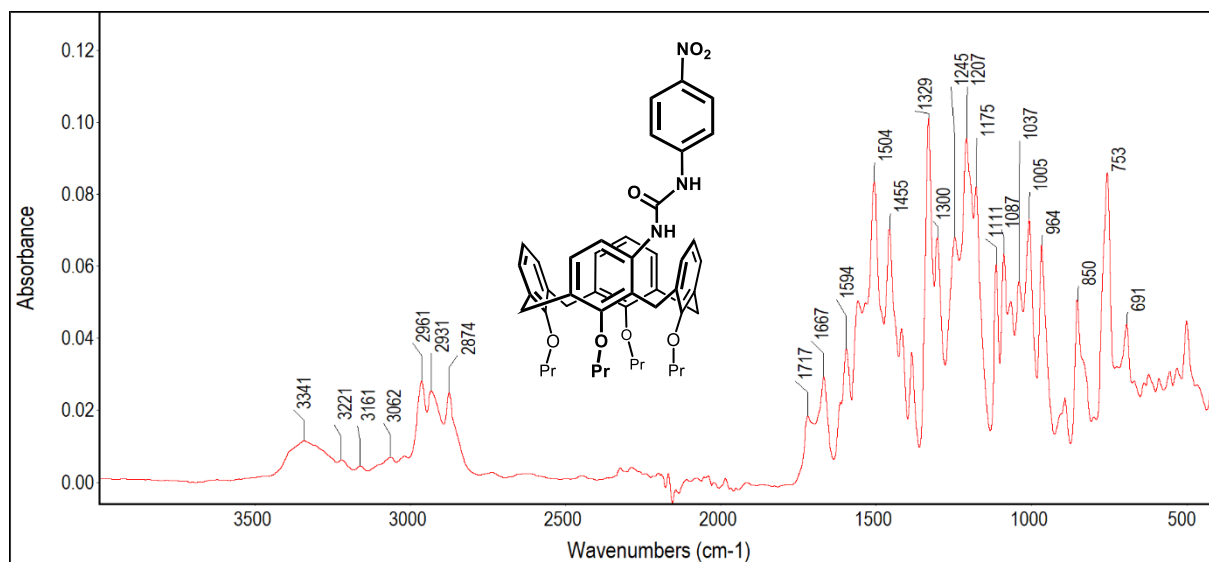

**Fig. S6:** IR spectrum of compound **3a** (ATR).

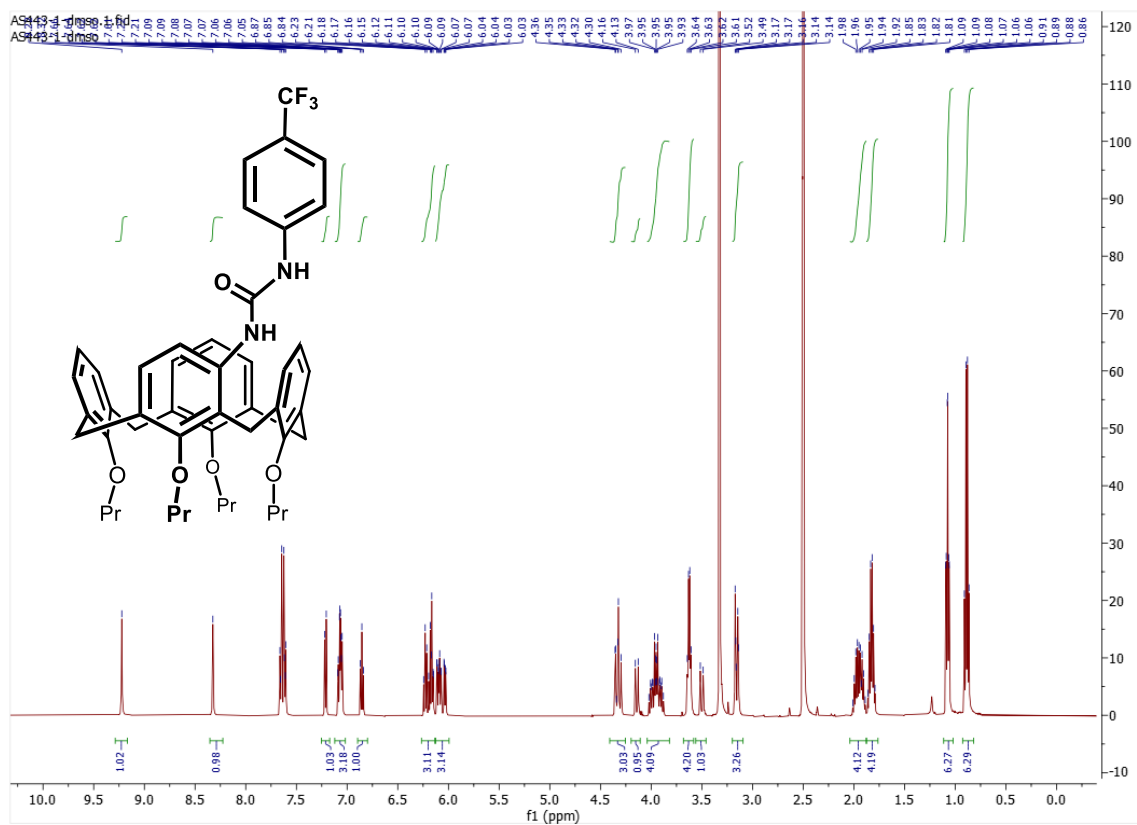

**Fig. S7:**  $^1\text{H}$  NMR of compound **3b** (DMSO, 500 MHz, 298 K)

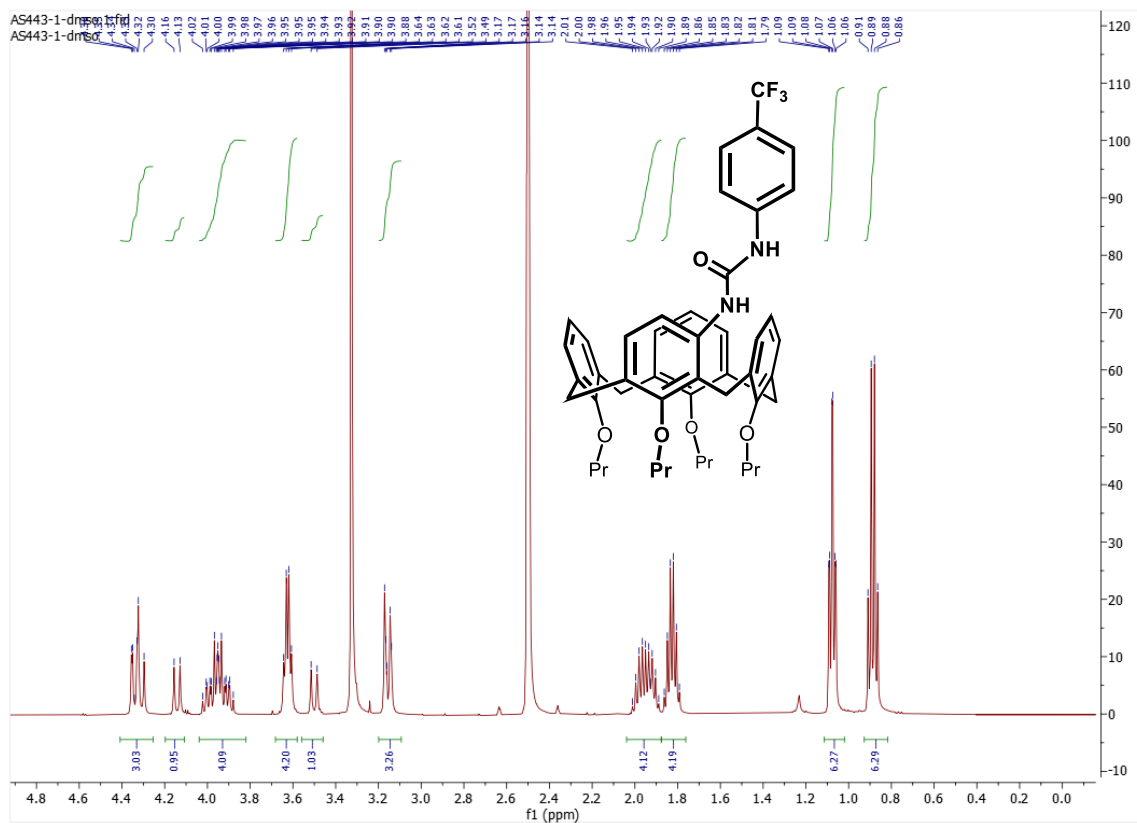

**Fig. S8:**  $^1\text{H}$  NMR of compound **3b**, aliphatic region (DMSO, 500 MHz, 298 K)

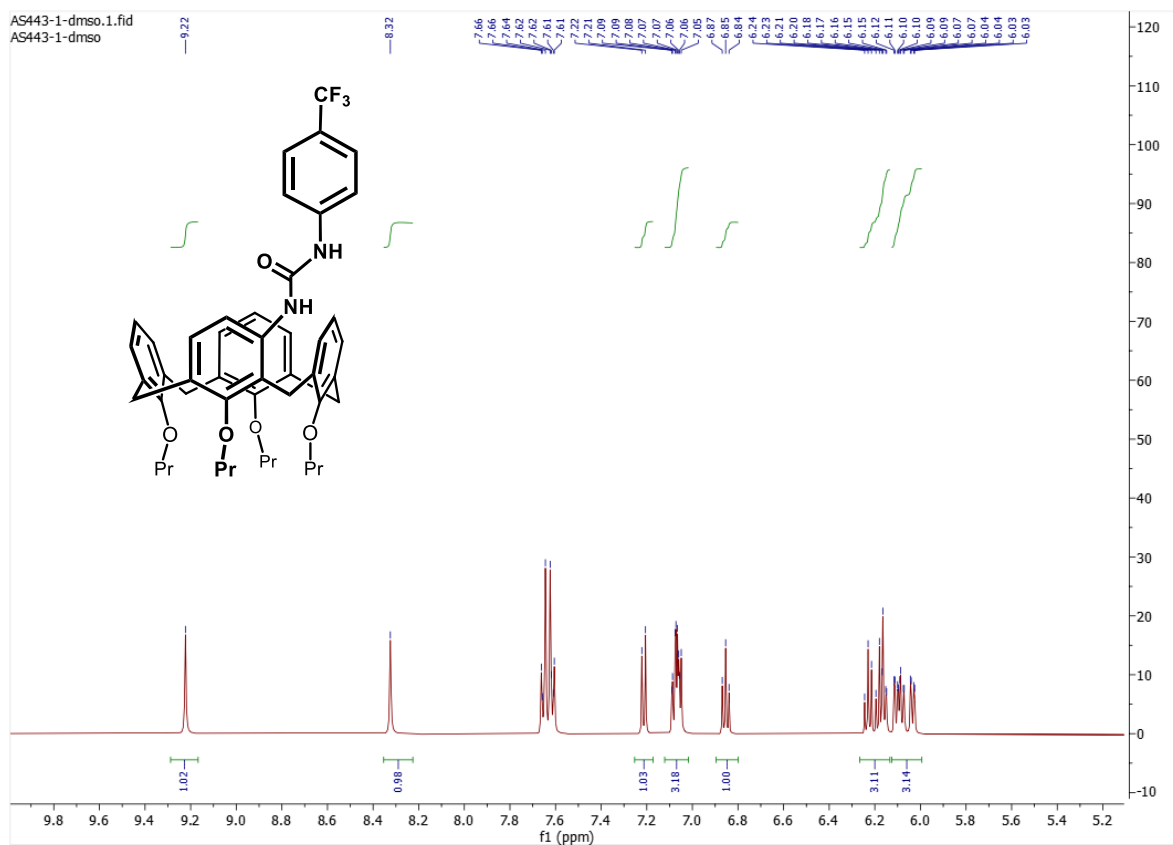

**Fig. S9:** <sup>1</sup>H NMR of compound **3b**, aromatic region (DMSO, 500 MHz, 298 K)

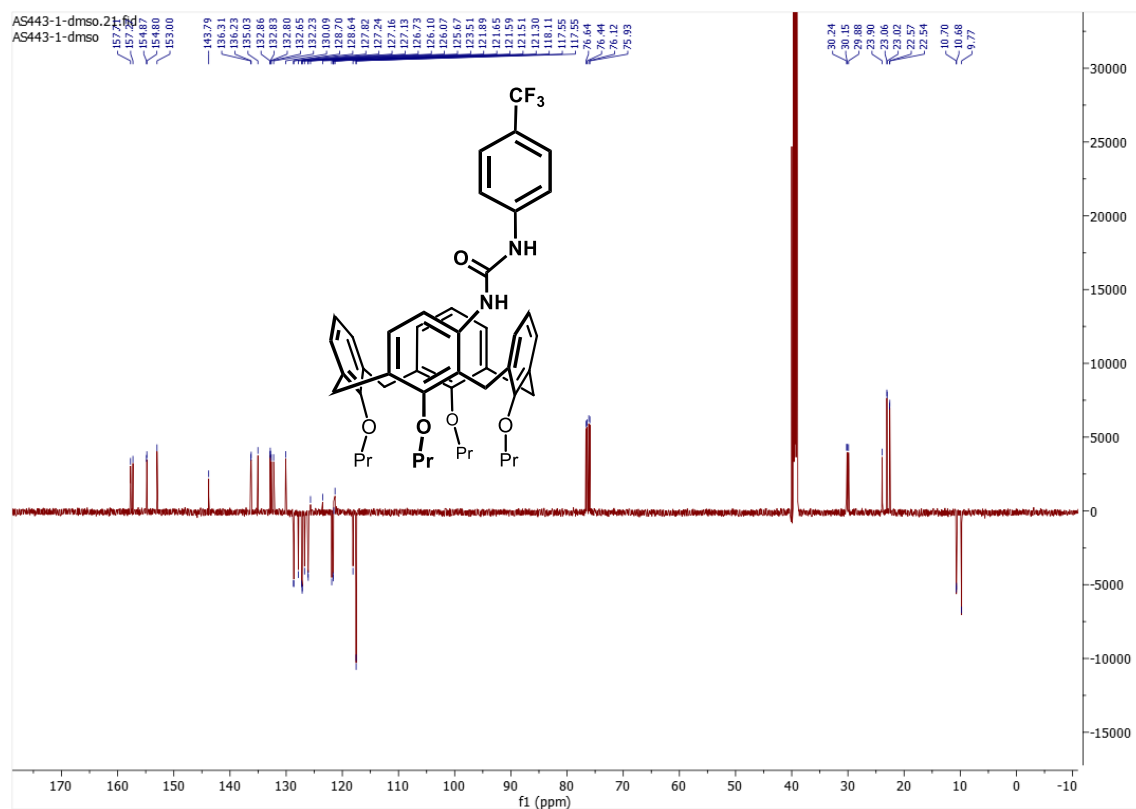

**Fig. S10:** <sup>13</sup>C(APT) NMR of compound **3b** (DMSO, 125 MHz, 298 K)

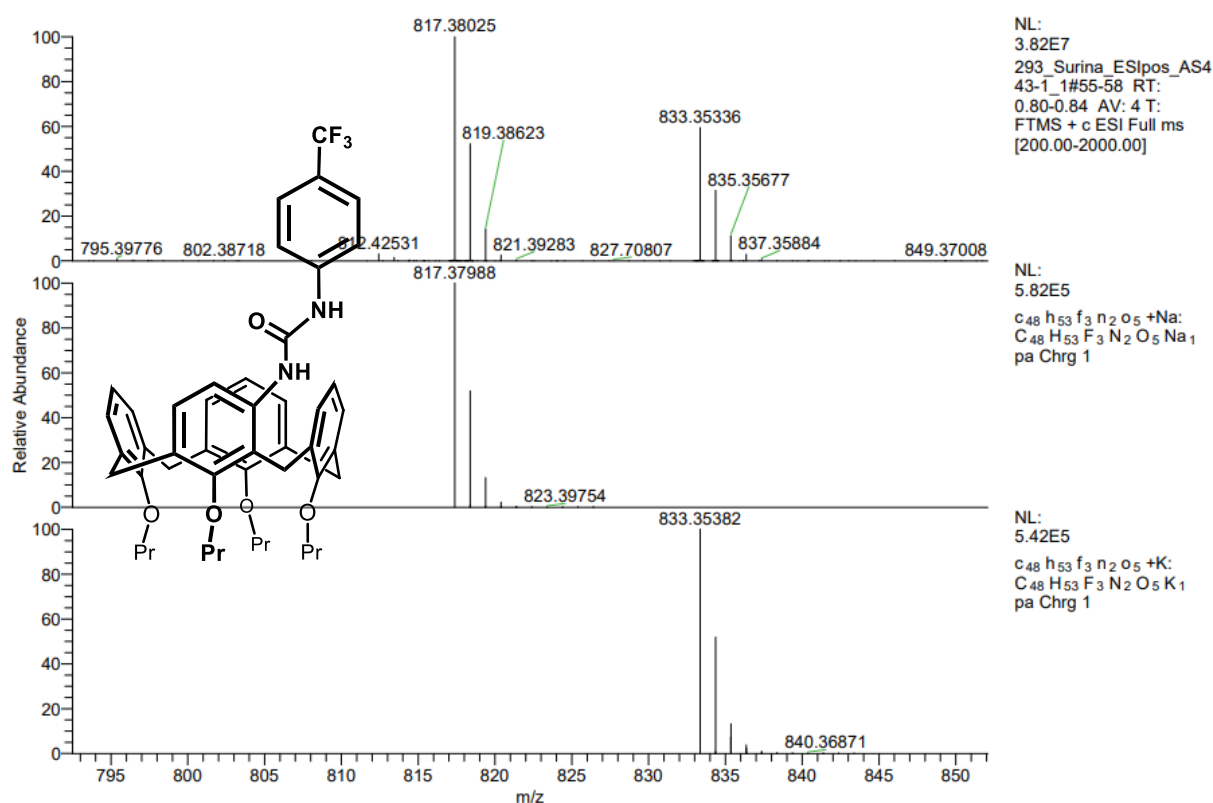

**Fig. S11:** HRMS (ESI) of compound **3b** calcd for C<sub>47</sub>H<sub>53</sub>N<sub>3</sub>O<sub>7</sub> 794.3776 [M+Na]<sup>+</sup>, found m/z 794.3783 [M+Na]<sup>+</sup>.

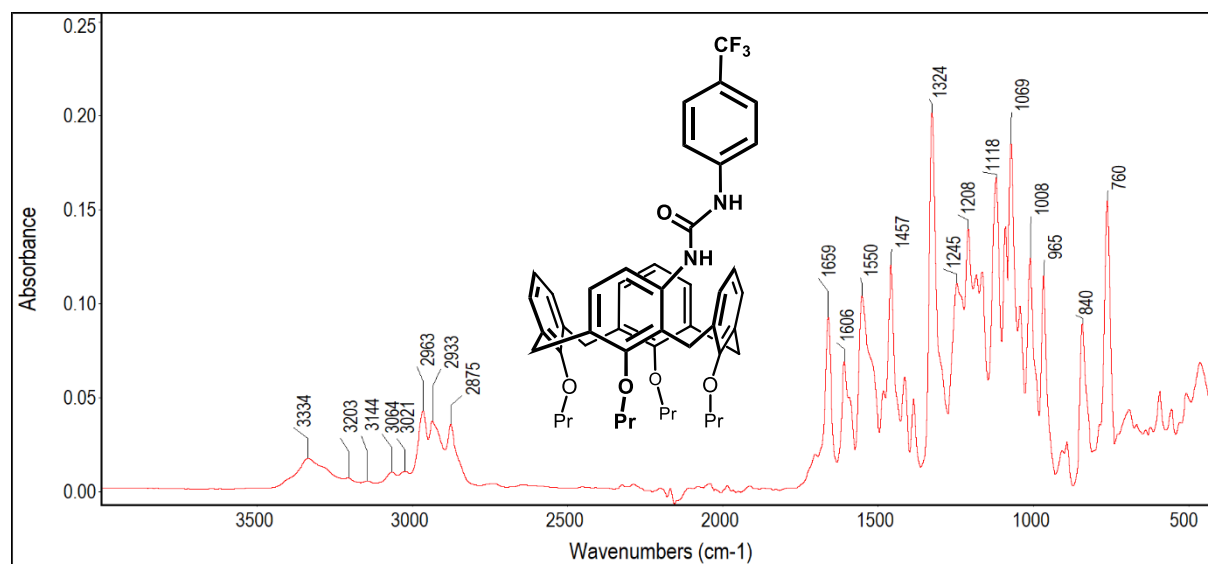

**Fig. S12:** IR spectrum of compound **3b** (ATR).

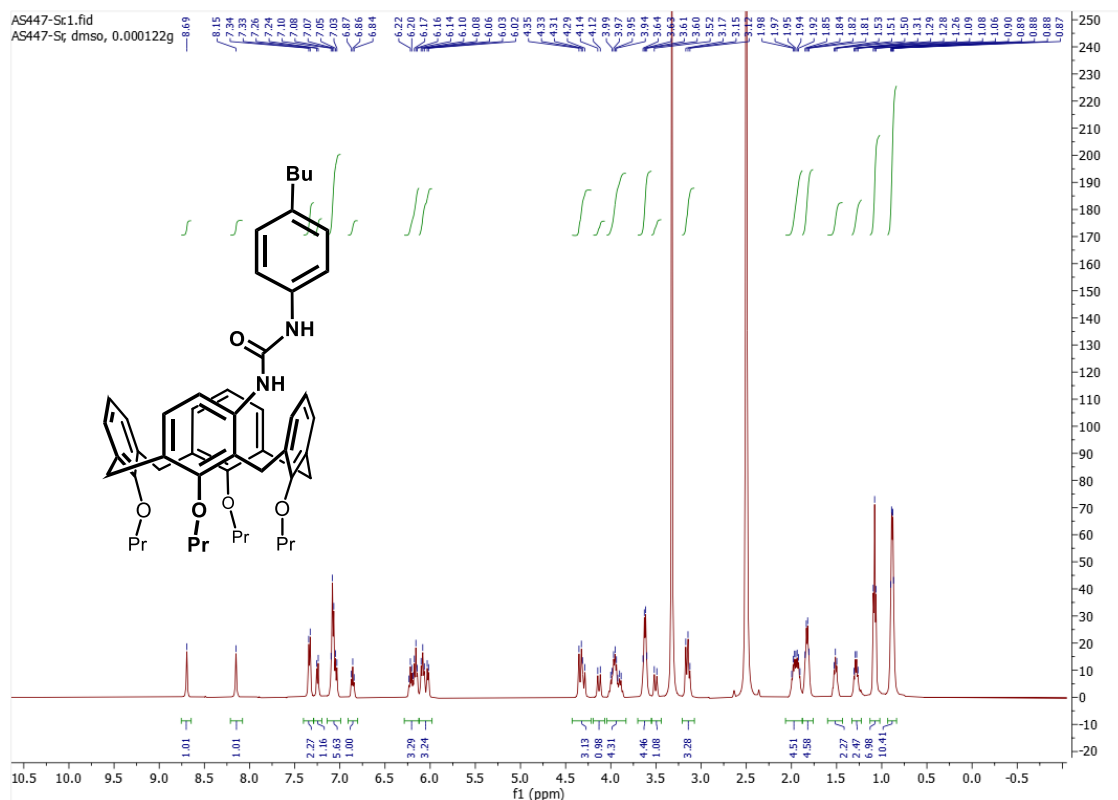

**Fig. S13:**  $^1\text{H}$  NMR of compound **3c** (DMSO, 500 MHz, 298 K)

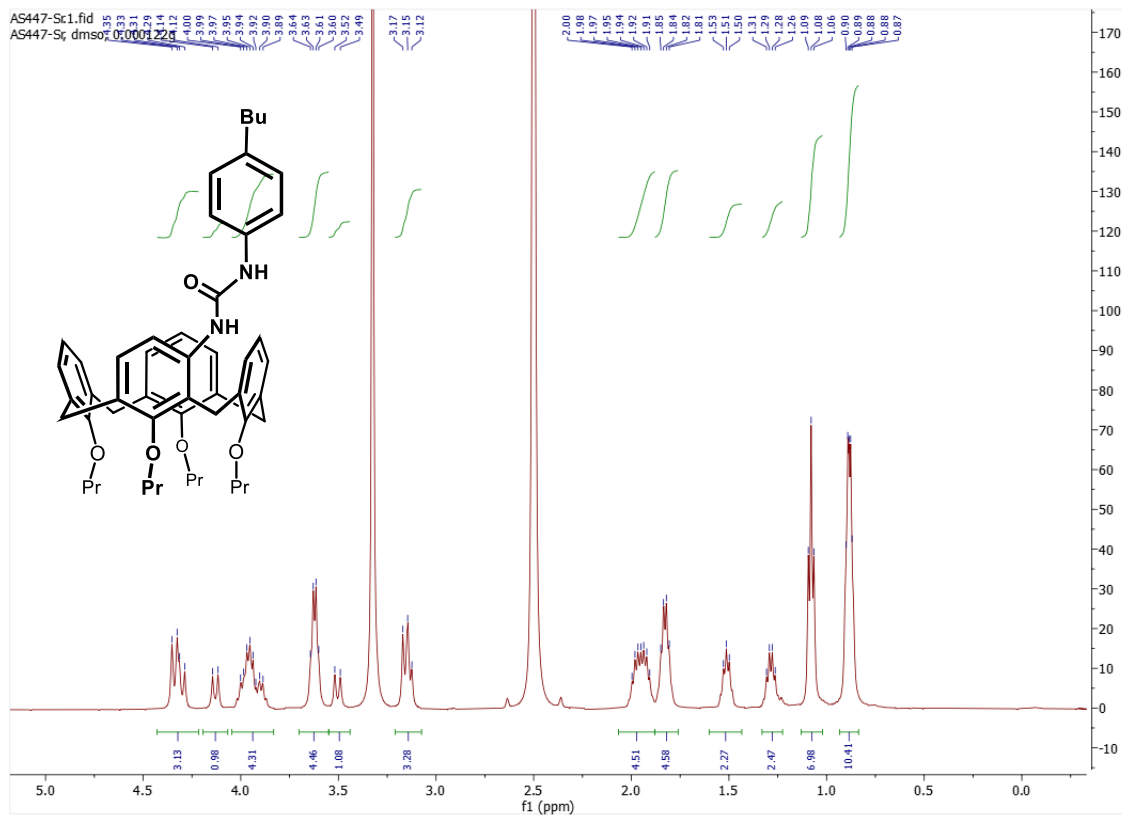

**Fig. S14:**  $^1\text{H}$  NMR of compound **3c**, aliphatic region (DMSO, 500 MHz, 298 K)





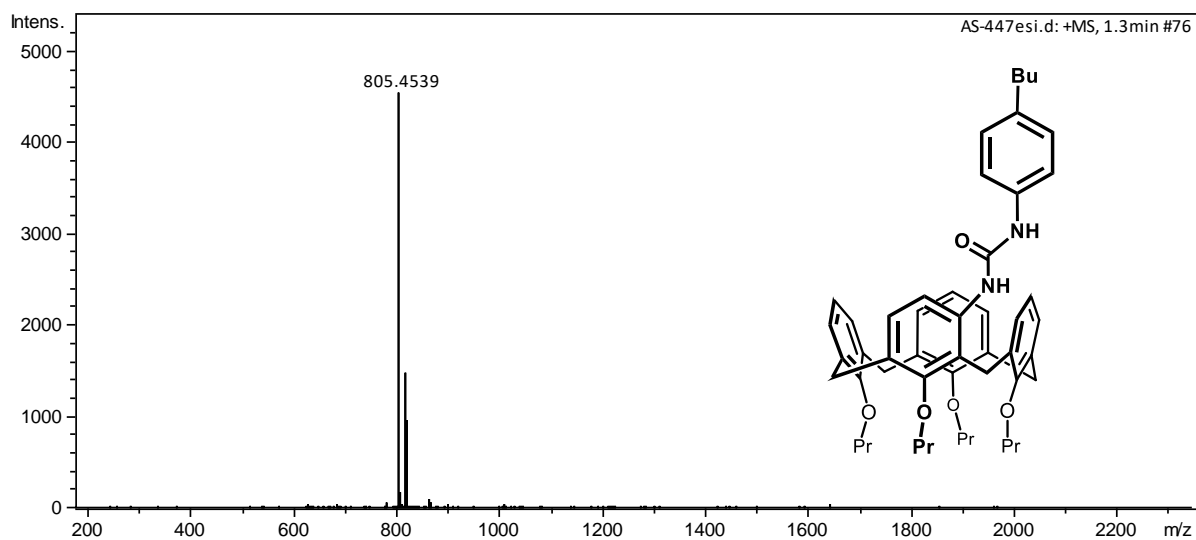

**Fig. S17:** HRMS (ESI) of compound **3c** calcd.  $[C_{51}H_{62}N_2O_5+Na]^+$  805.4551; found  $m/z$  805.4539  $[M+Na]^+$ .

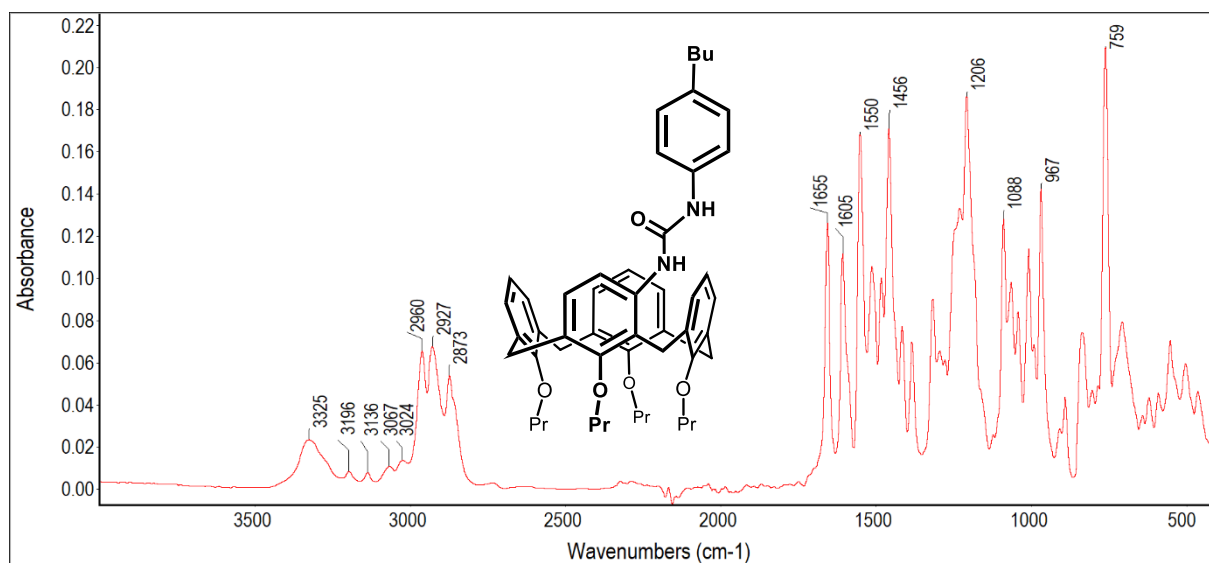

**Fig. S18:** IR spectrum of compound **3c** (ATR).



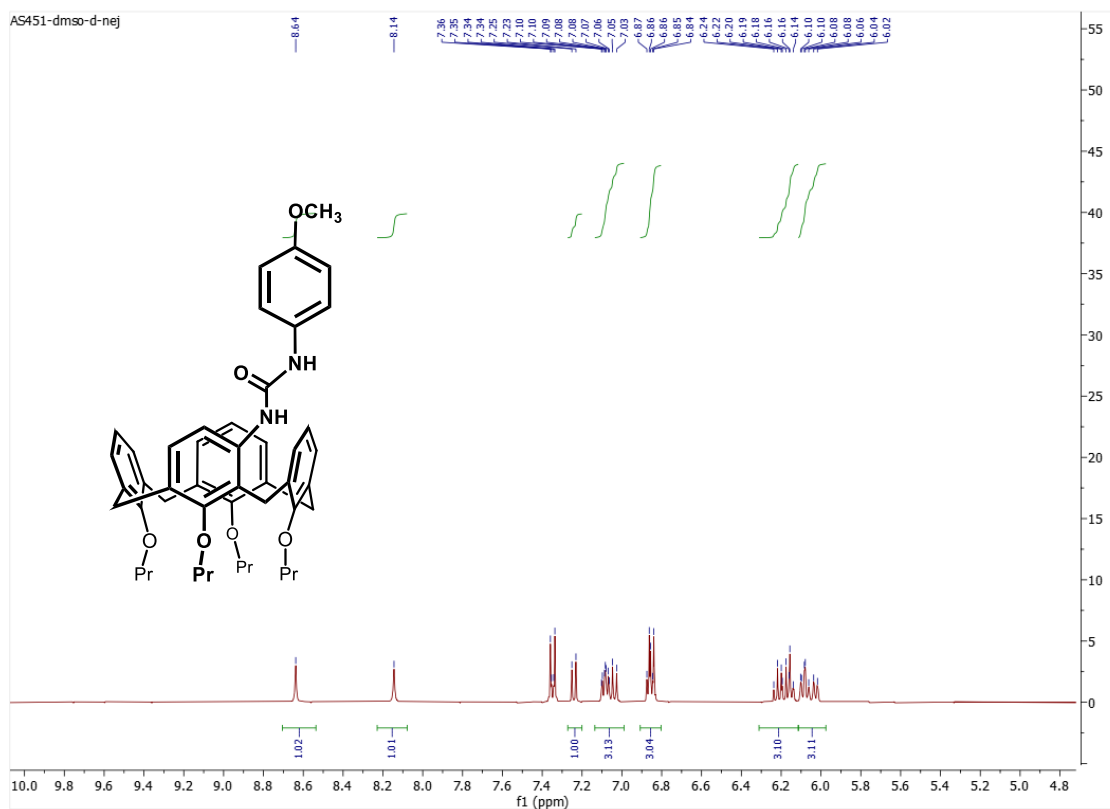

**Fig. S21:** <sup>1</sup>H NMR of compound **3d**, aromatic region (DMSO, 500 MHz, 298 K)

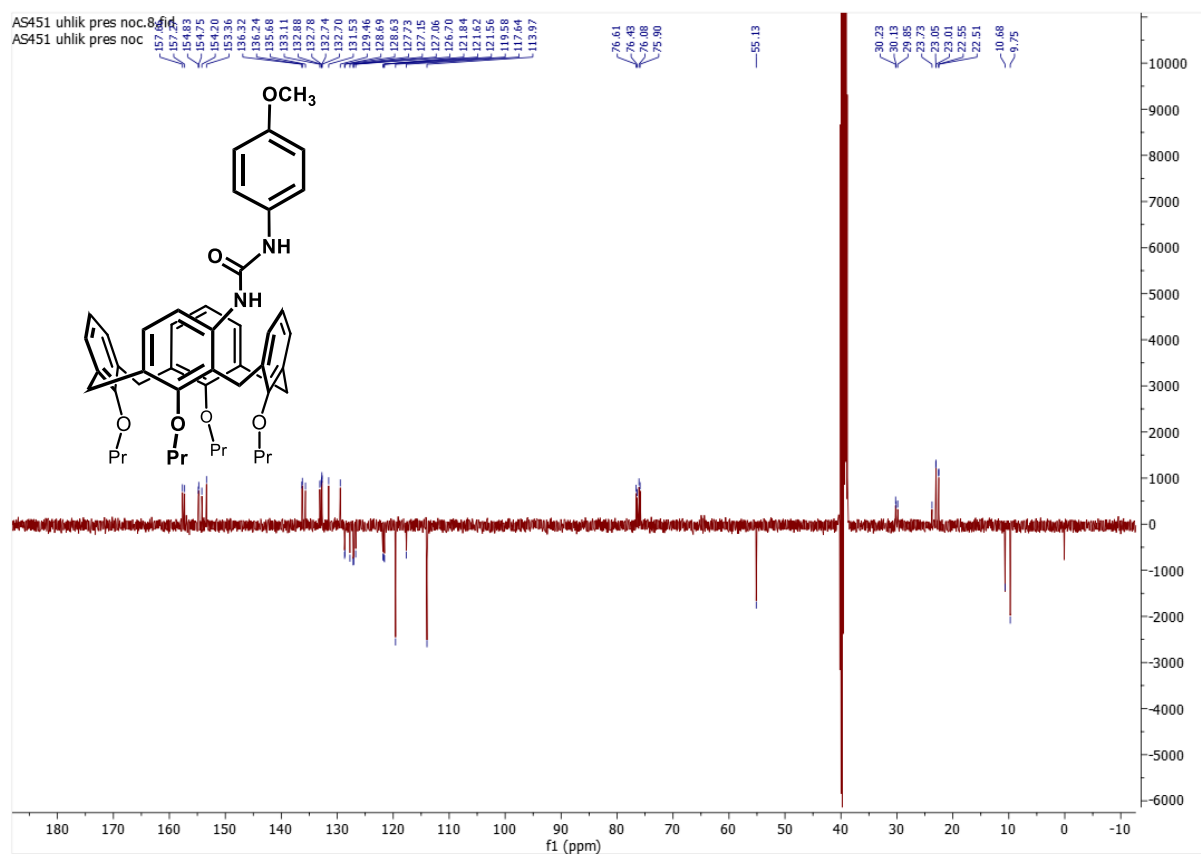

**Fig. S22:** <sup>13</sup>C(APT) NMR of compound **3d** (DMSO, 125 MHz, 298 K)

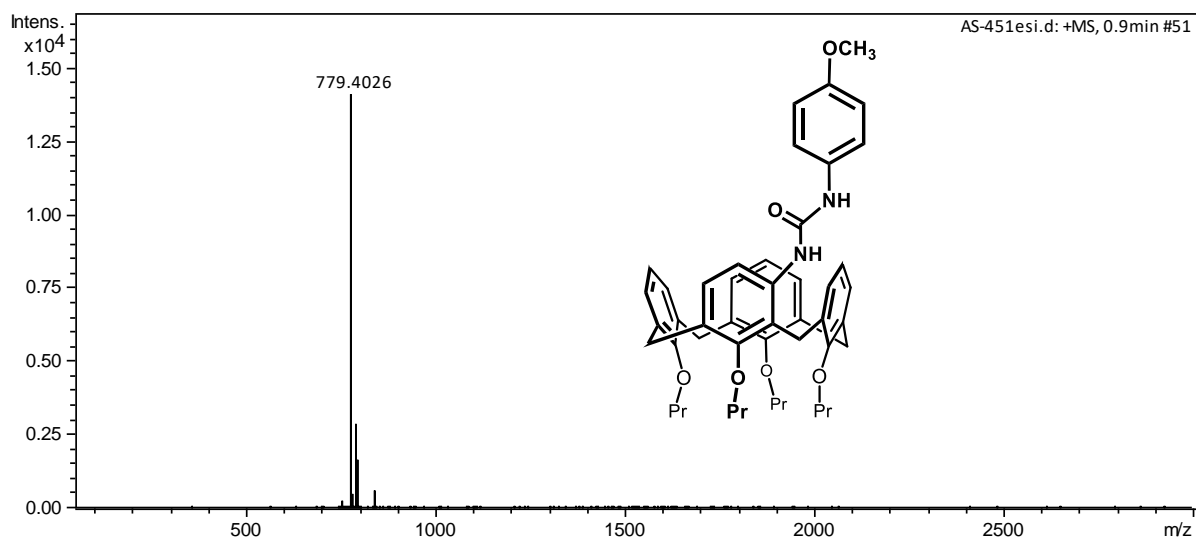

**Fig. S23:** HRMS (ESI) of compound **3d** calcd.  $[C_{48}H_{56}N_2O_6+Na]^+$  779.4030; found  $m/z$  779.4026  $[M+Na]^+$ .

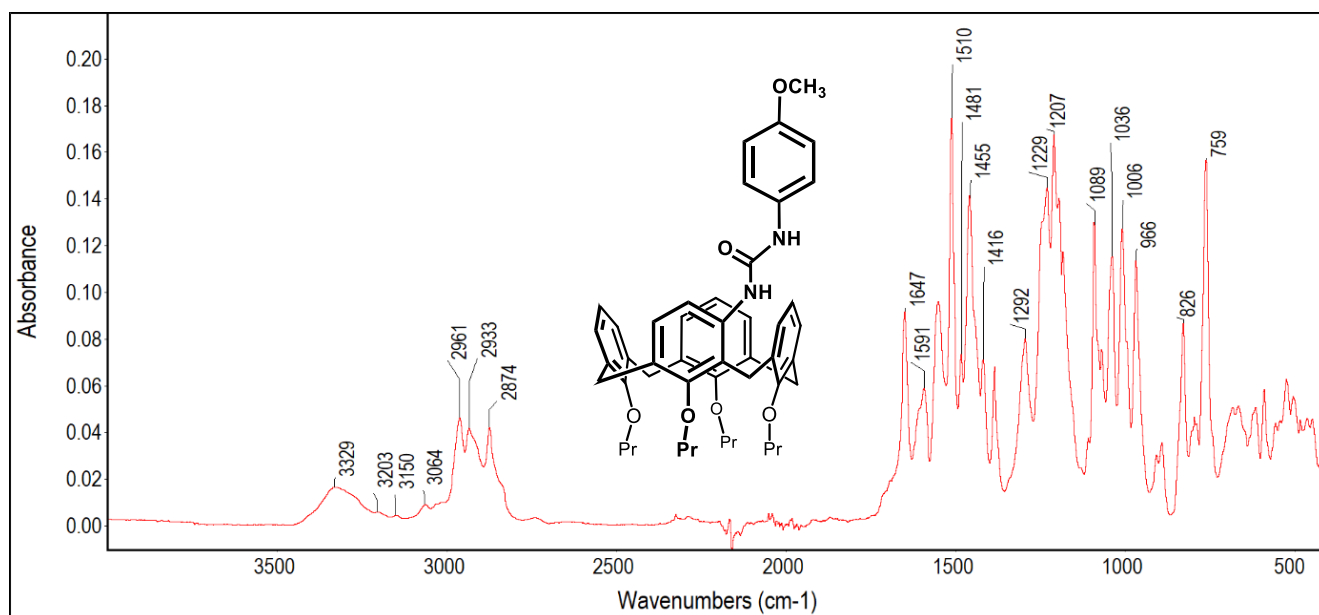

**Fig. S24:** IR spectrum of compound **3d** (ATR).

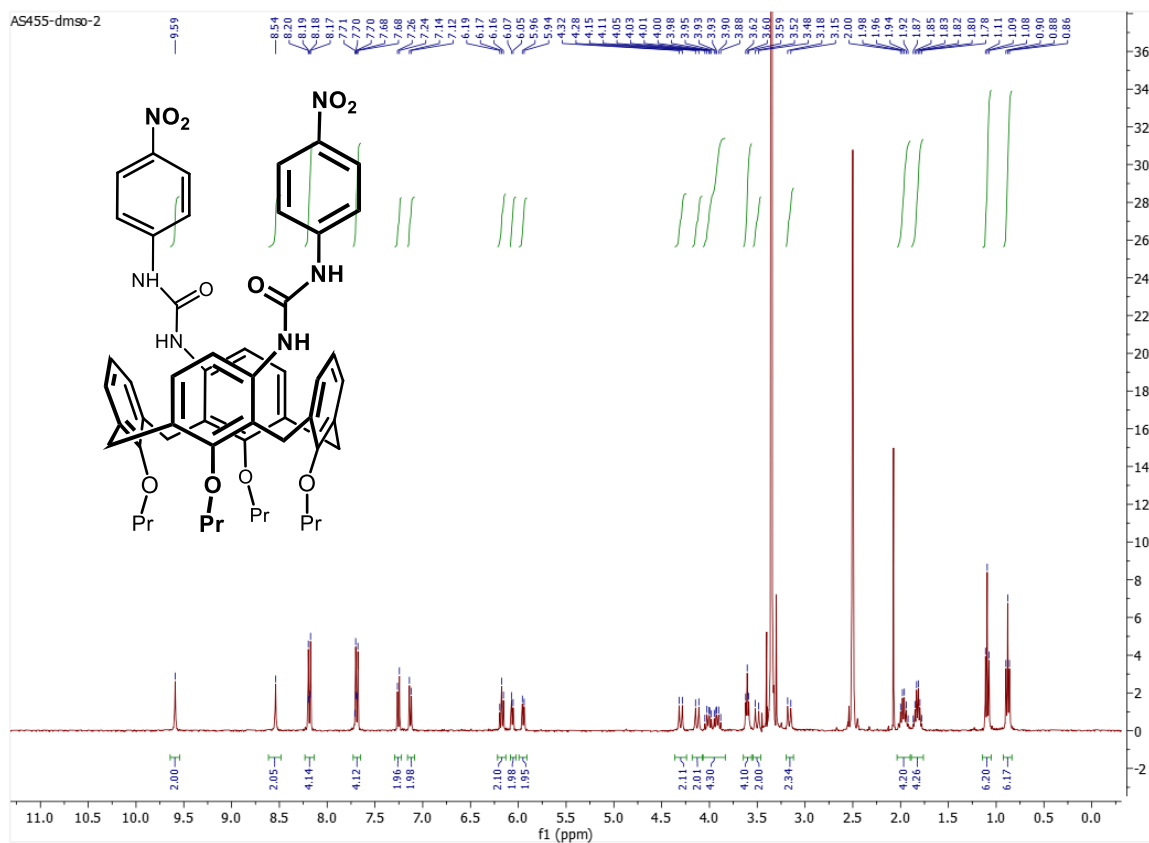

**Fig. S25:** <sup>1</sup>H NMR of compound **7a** (DMSO, 500 MHz, 298 K)

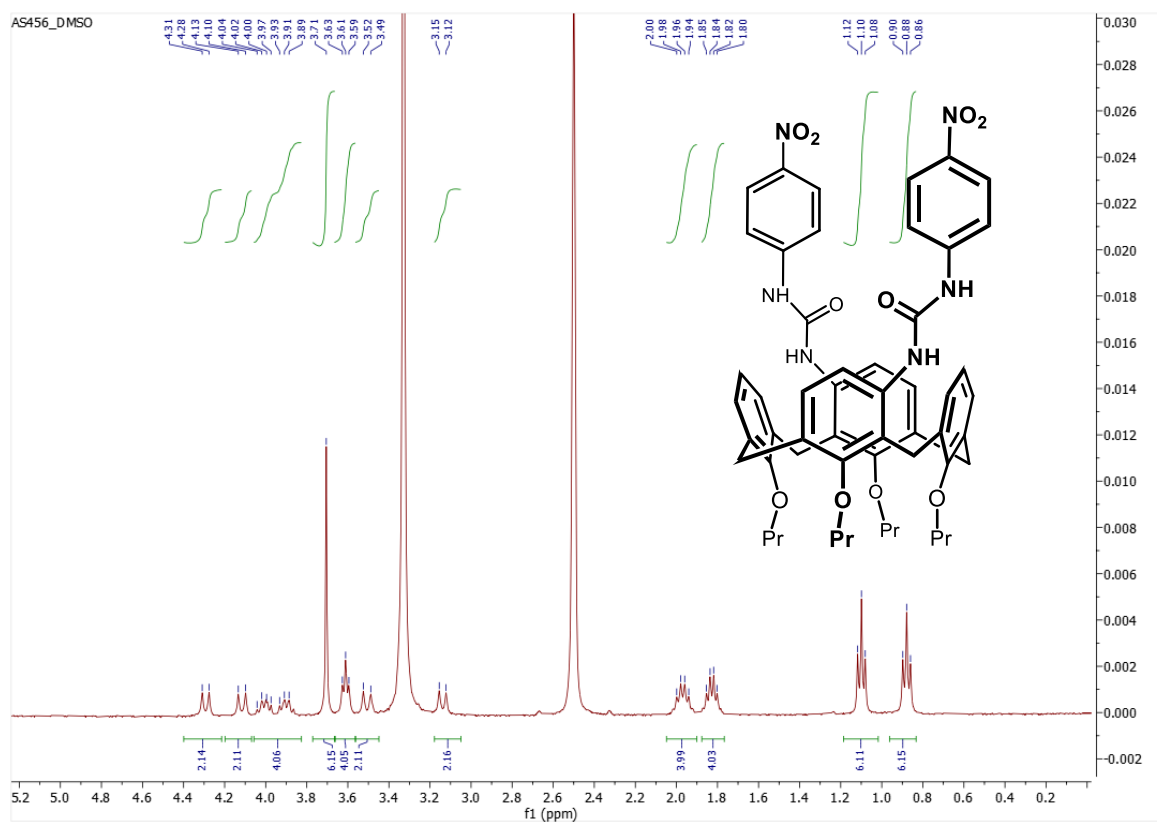

**Fig. S26:** <sup>1</sup>H NMR of compound **7a**, aliphatic region (DMSO, 500 MHz, 298 K)

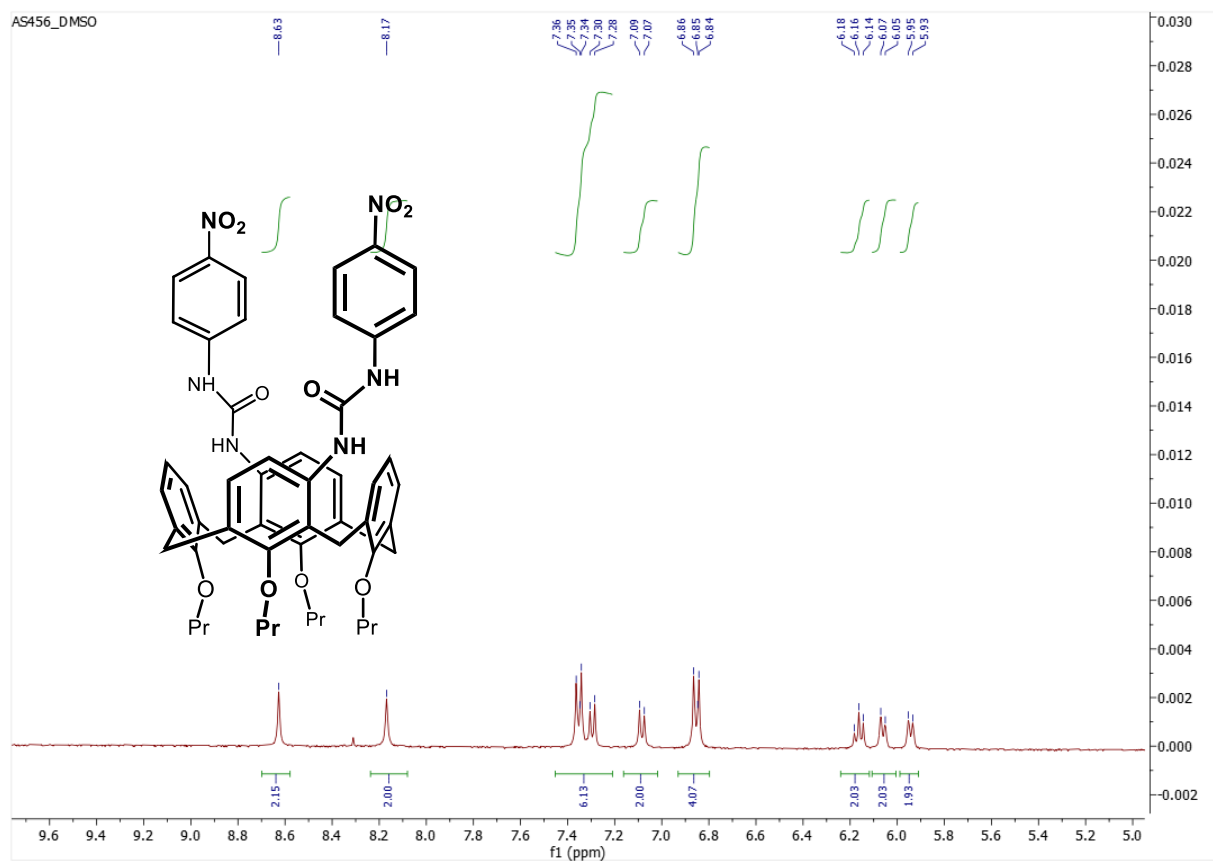

Fig. S27:  $^1\text{H}$  NMR of compound 7a, aromatic region (DMSO, 500 MHz, 298 K)

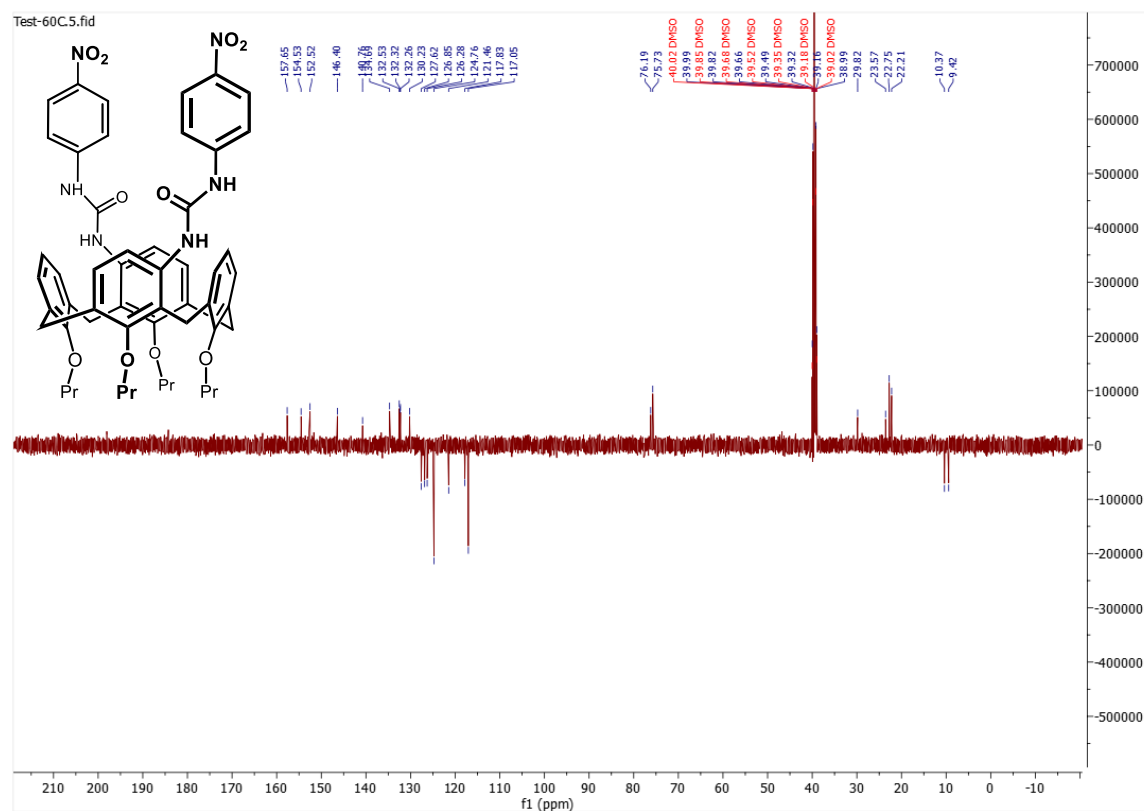

Fig. S28:  $^{13}\text{C}$ (APT) NMR of compound 7a (DMSO, 125 MHz, 333 K)

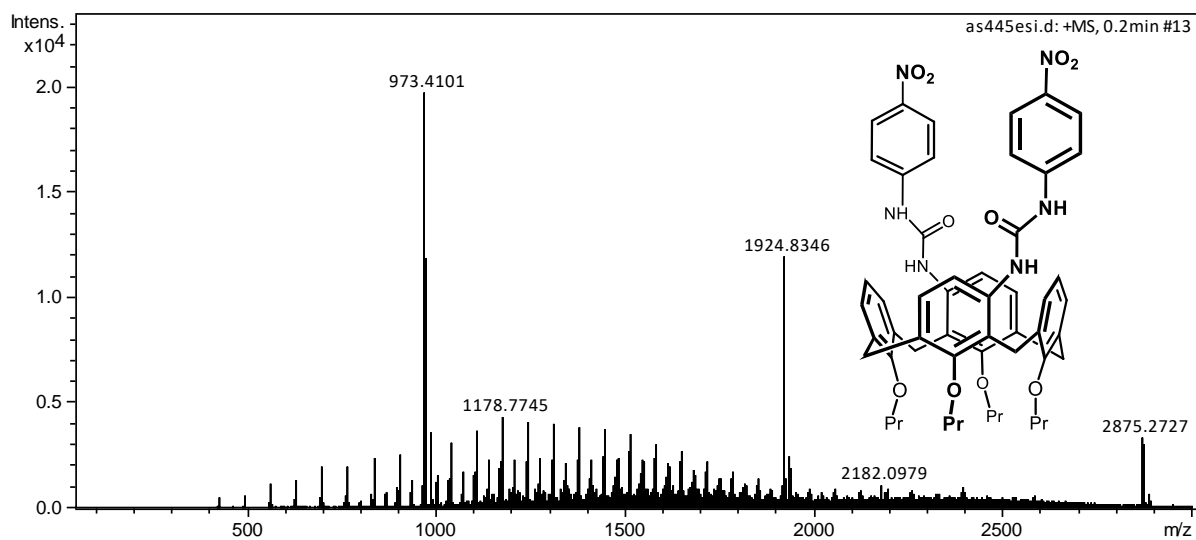

**Fig. S29:** HRMS (ESI) of compound **7a** calcd.  $[C_{54}H_{58}N_6O_{10}+Na]^+$  973.4106; found  $m/z$  973.4101  $[M+Na]^+$ .

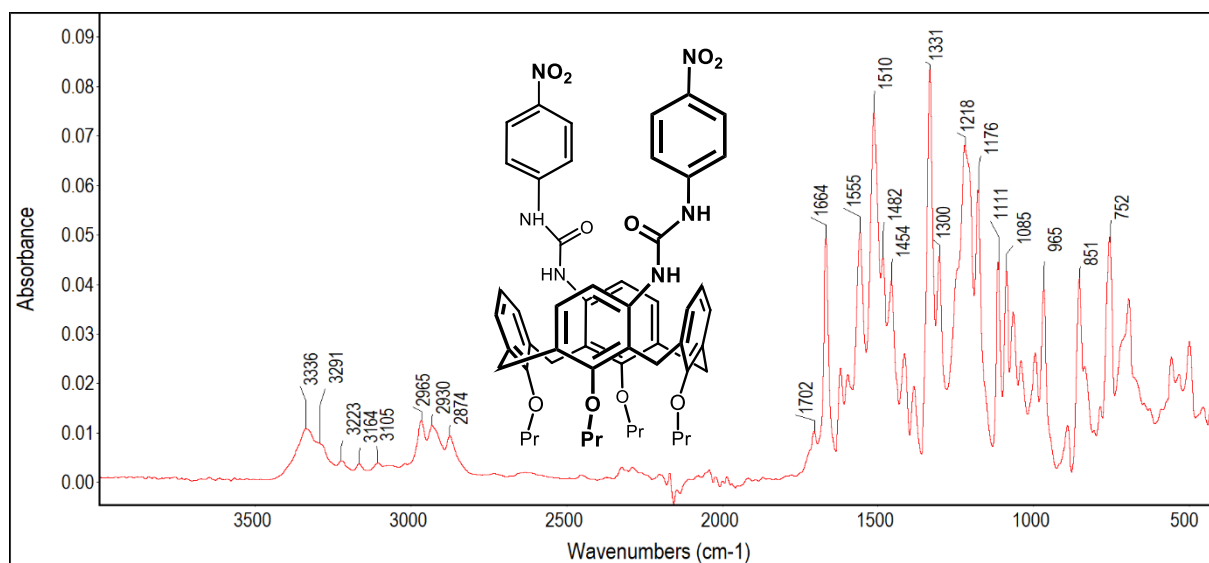

**Fig. S30:** IR spectrum of compound **7a** (ATR).





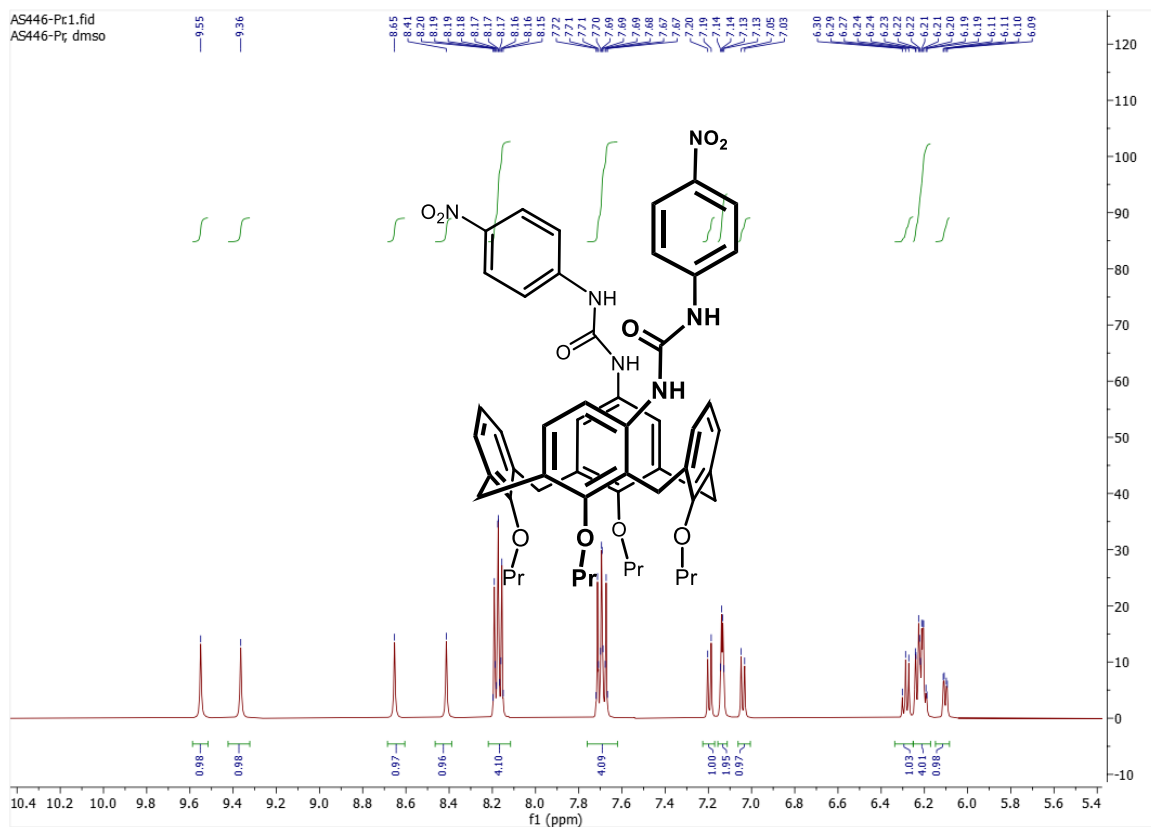

**Fig. S33:**  $^1\text{H}$  NMR of compound **8a**, aromatic region (DMSO, 500 MHz, 298 K)

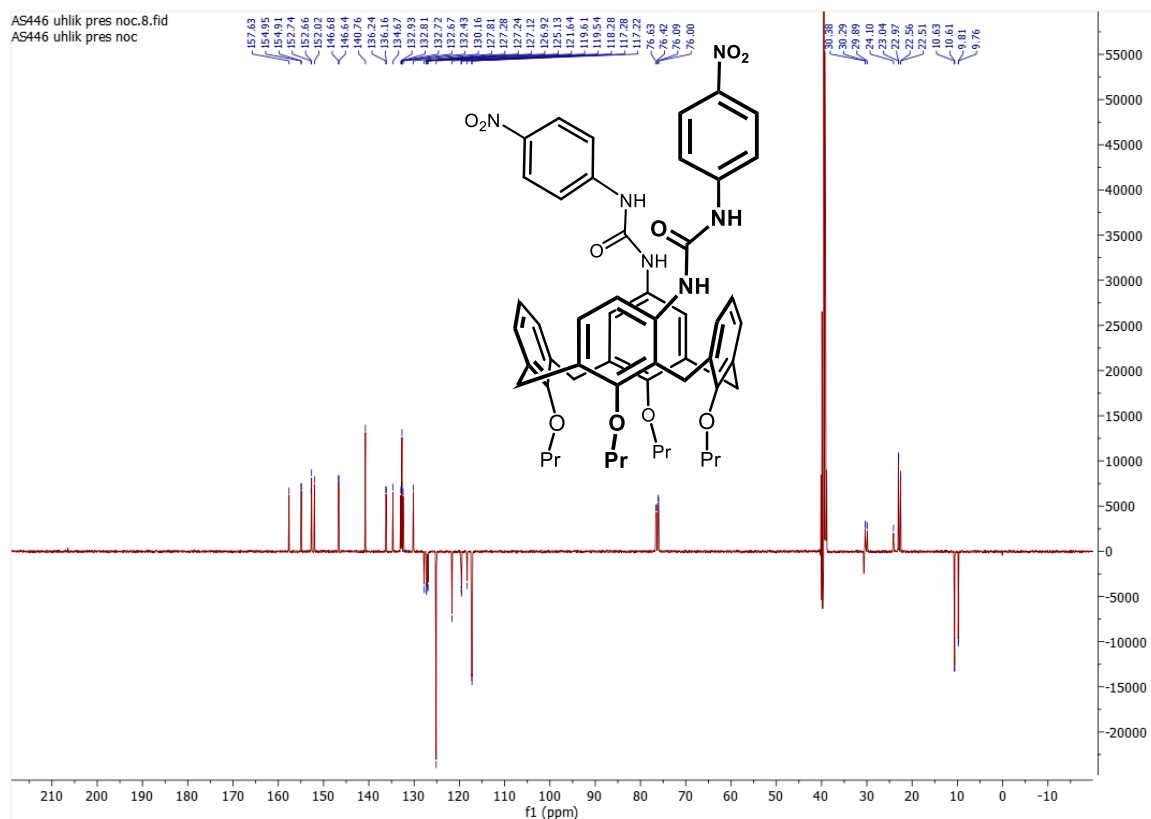

**Fig. S34:**  $^{13}\text{C}$ (APT) NMR of compound **8a** (DMSO, 125 MHz, 298 K)

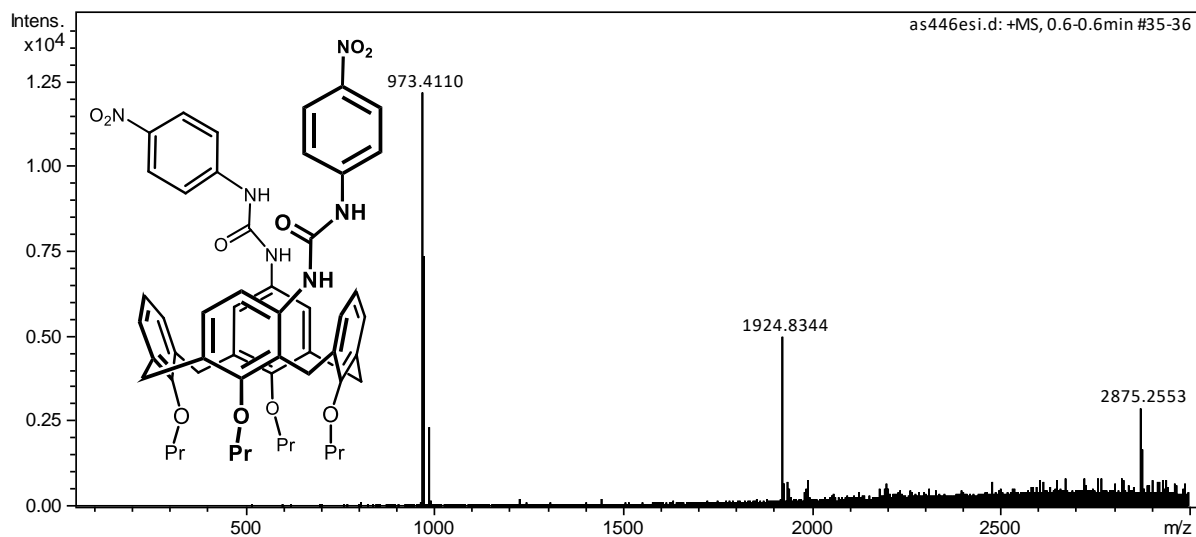

**Fig. S35:** HRMS (ESI) of compound **8a** calcd.  $[C_{54}H_{58}N_6O_{10}+Na]^+$  973.4106; found  $m/z$  973.4110  $[M+Na]^+$ .

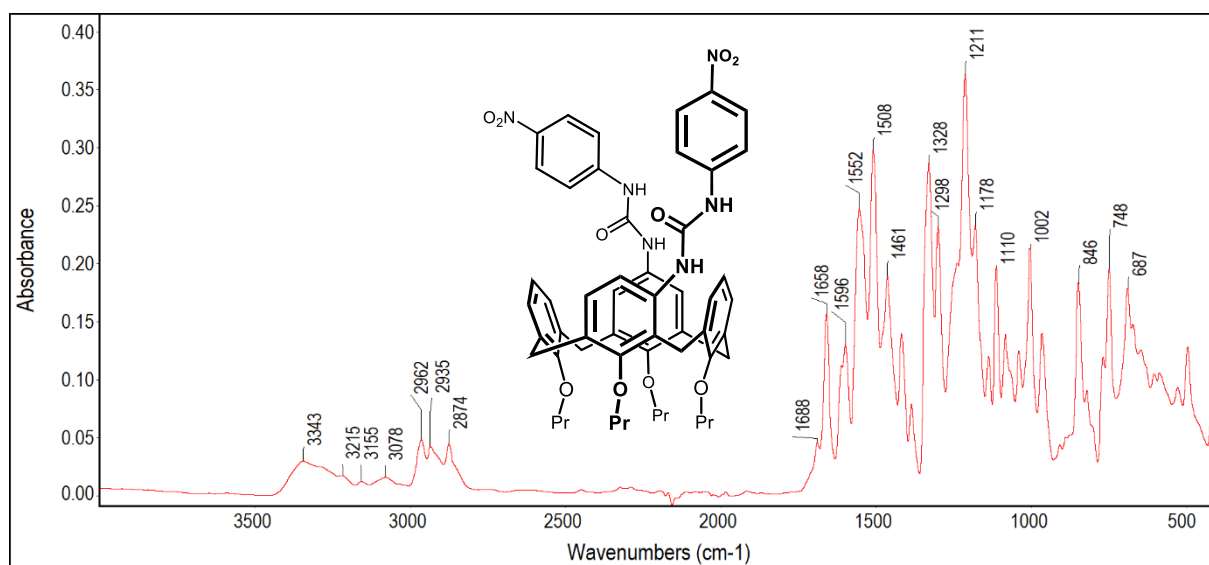

**Fig. S36:** IR spectrum of compound **8a** (ATR).

## 2. Association constants $K_{As}$

**Table S1:** Comparison of association constants  $K_{As}$  for a series of mono *m*-substituted urea receptors **3** during recognition of TBAH<sub>2</sub>PO<sub>4</sub>, determined by UV-Vis<sup>[b]</sup> (in DMSO) or <sup>1</sup>H NMR<sup>[c]</sup> titrations (in DMSO-*d*<sub>6</sub>) at 25 °C, reported together with chemical shift of receptor urea NH proton (highlighted in Fig. 23 by orange colour).

| Receptor (R-)           | <b>3a (-NO<sub>2</sub>)</b> <sup>[b]</sup> | <b>3b (-CF<sub>3</sub>)</b> <sup>[c]</sup> | <b>3c (-<i>n</i>Bu)</b> <sup>[c]</sup> | <b>3d (-OCH<sub>3</sub>)</b> <sup>[c]</sup> |
|-------------------------|--------------------------------------------|--------------------------------------------|----------------------------------------|---------------------------------------------|
| $K_{As}$ <sup>[a]</sup> | 1 060                                      | 750                                        | 470                                    | 300                                         |
| $\delta_{NH1}$ (ppm)    | 9.56                                       | 9.21                                       | 8.73                                   | 8.61                                        |

<sup>[a]</sup> Error, when estimated, was < 15 %.

**Table S2:** Comparison of association constants  $K_{As}$  (1:1)<sup>[a]</sup> for nitro-substituted mono-urea receptors **3a** and **4** with a series of anions in the form of TBA salts at 25 °C.

|                                                            | <b>4 (mono <i>p</i>-)</b> | <b>3a (mono <i>m</i>-)</b> |
|------------------------------------------------------------|---------------------------|----------------------------|
| H <sub>2</sub> PO <sub>4</sub> <sup>-</sup> <sup>[c]</sup> | 2 020                     | 1 060                      |
| BzO <sup>-</sup>                                           | 845 <sup>[b]</sup>        | 830 <sup>[c]</sup>         |
| Cl <sup>-</sup> <sup>[b]</sup>                             | 35                        | 50                         |
| HSO <sub>4</sub> <sup>-</sup> <sup>[b]</sup>               | 6                         | 4                          |

<sup>[a]</sup> Error, when estimated, was < 10 %. <sup>[b]</sup>Determined by <sup>1</sup>H NMR in DMSO-*d*<sub>6</sub>. <sup>[c]</sup>Determined by UV-Vis in DMSO.

**Table S3:** Association constants  $K_{As}$  (1:1)<sup>[a]</sup> and overall association constants  $\beta$  of receptors **7a** were determined by <sup>1</sup>H NMR with a series of anions in the form of TBA salts in DMSO-*d*<sub>6</sub> at 25 °C.

| Anion/ Constant                             | $K_{As}$ (1:1) <sup>[a]</sup> | $\beta$           |
|---------------------------------------------|-------------------------------|-------------------|
| H <sub>2</sub> PO <sub>4</sub> <sup>-</sup> | 1 660                         | $6.89 \cdot 10^5$ |
| BzO <sup>-</sup>                            | 1 440                         | $5.18 \cdot 10^5$ |
| AcO <sup>-</sup>                            | 1 160                         | $3.36 \cdot 10^5$ |

<sup>[a]</sup> Error, when estimated, was < 5 %. Evaluated by the non-cooperative model:  $\beta = K_{As}(1) \times K_{As}(2)$ , and  $K_{As}(2) = K_{As}(1)/4$ .

**Table S4:** Association constants  $K_{As}$  (1:1) and overall association constants  $\beta$  of receptors **8a** were determined by <sup>1</sup>H NMR<sup>[a]</sup> (or UV-Vis<sup>[b]</sup>) in DMSO-*d*<sub>6</sub> (DMSO) with a series of anions in the form of TBA salts at 25 °C.

|                                                            | Utilised stoichiometry | $K_{As}$ (1:1) <sup>[c]</sup> | $\beta$ |
|------------------------------------------------------------|------------------------|-------------------------------|---------|
| H <sub>2</sub> PO <sub>4</sub> <sup>-</sup> <sup>[b]</sup> | 1:1                    | 13 600                        | -       |
| BzO <sup>-</sup> <sup>[b, *]</sup>                         | 1:1                    | 2 450                         | -       |
| AcO <sup>-</sup> <sup>[b]</sup>                            | 1:1                    | 4 170                         | -       |
| Cl <sup>-</sup> <sup>[a, d]</sup>                          | 1:2                    | 60                            | 900     |
| HSO <sub>4</sub> <sup>-</sup> <sup>[a, d]</sup>            | 1:2                    | 15                            | 56      |

<sup>[c]</sup> Error, when estimated, was < 5 %. <sup>[d]</sup> Were evaluated by the non-cooperative model:  $\beta = K_{As}(1) \times K_{As}(2)$ , and  $K_{As}(2) = K_{As}(1)/4$ . \* The results might also be fitted by 1:2 stoichiometry.

### 3. Dilution study of nitro-substituted ureas in DMSO

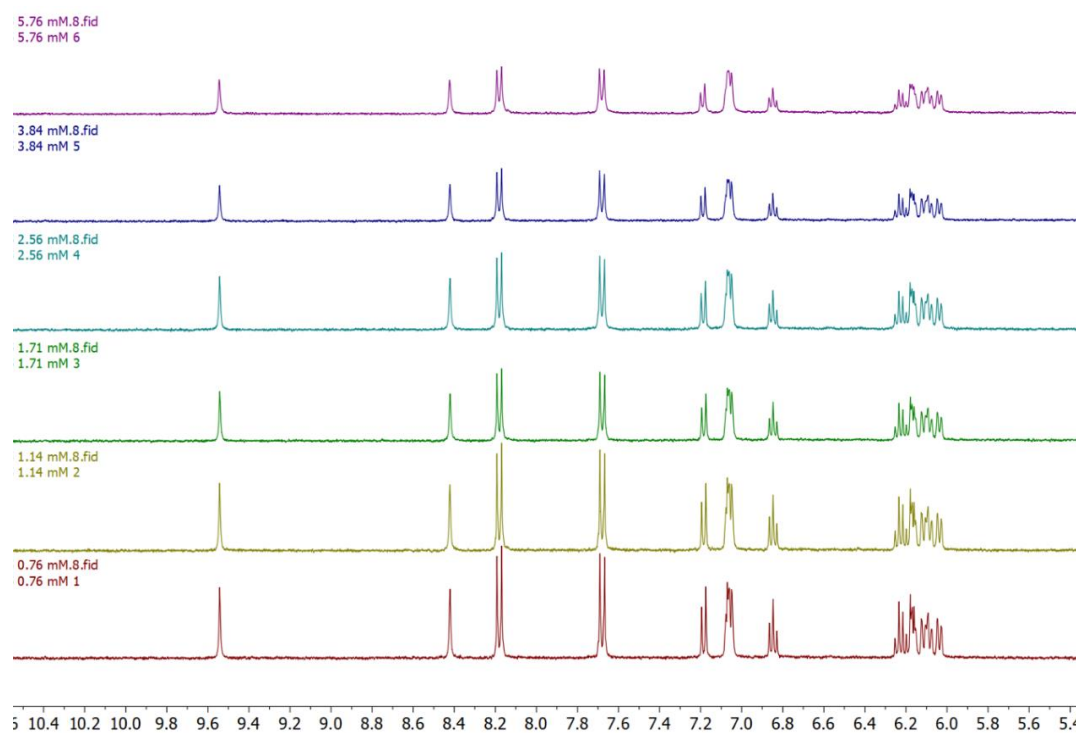

**Fig. S37:** Part of  $^1\text{H}$  NMR spectra for urea's hydrogen NH and aromatic region of **3a** in  $\text{DMSO-}d_6$ . The studied concentration range corresponds to 5.8 - 0.8 mM. The higher concentration was not obtained as the compound did not dissolve.

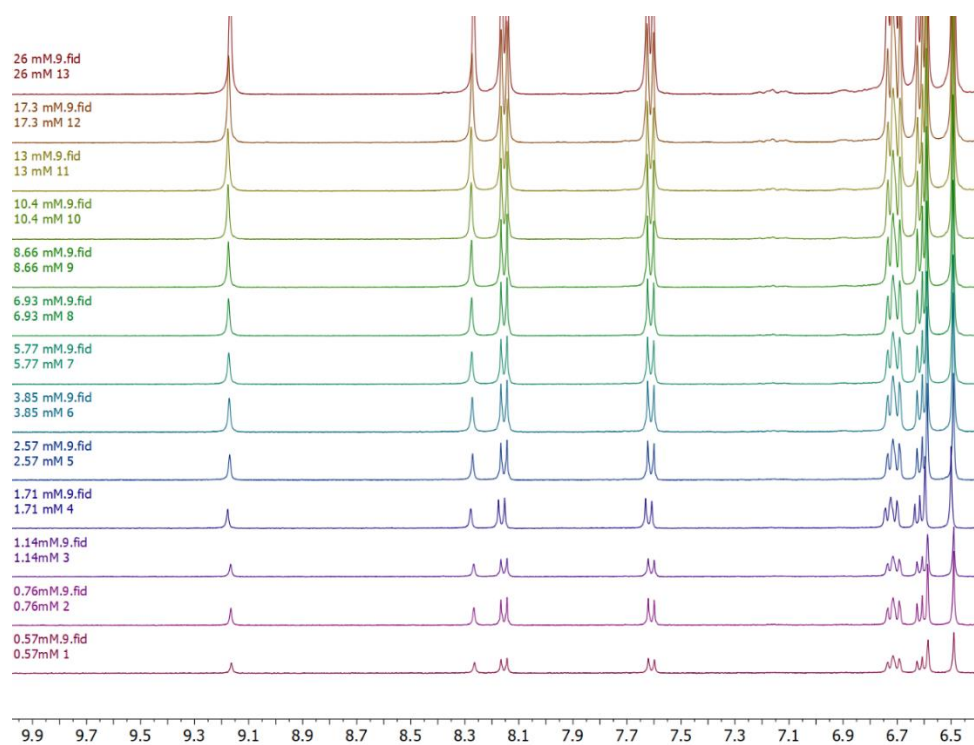

**Fig. S38:** Part of  $^1\text{H}$  NMR spectra for urea's hydrogen NH and aromatic region of **4** in  $\text{DMSO-}d_6$ . The studied concentration range corresponds to 26 - 0.6 mM.

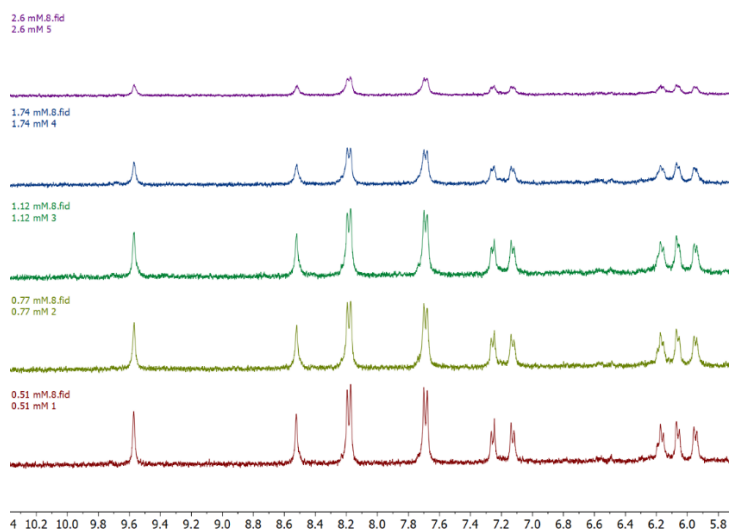

**Fig. S39:** Part of  $^1\text{H}$  NMR spectra for urea's hydrogen  $\text{NH}$  and aromatic region of **7a** in  $\text{DMSO-}d_6$ . The studied concentration range corresponds to 2.6 - 0.5 mM. The higher concentration was not obtained as the compound did not dissolve.

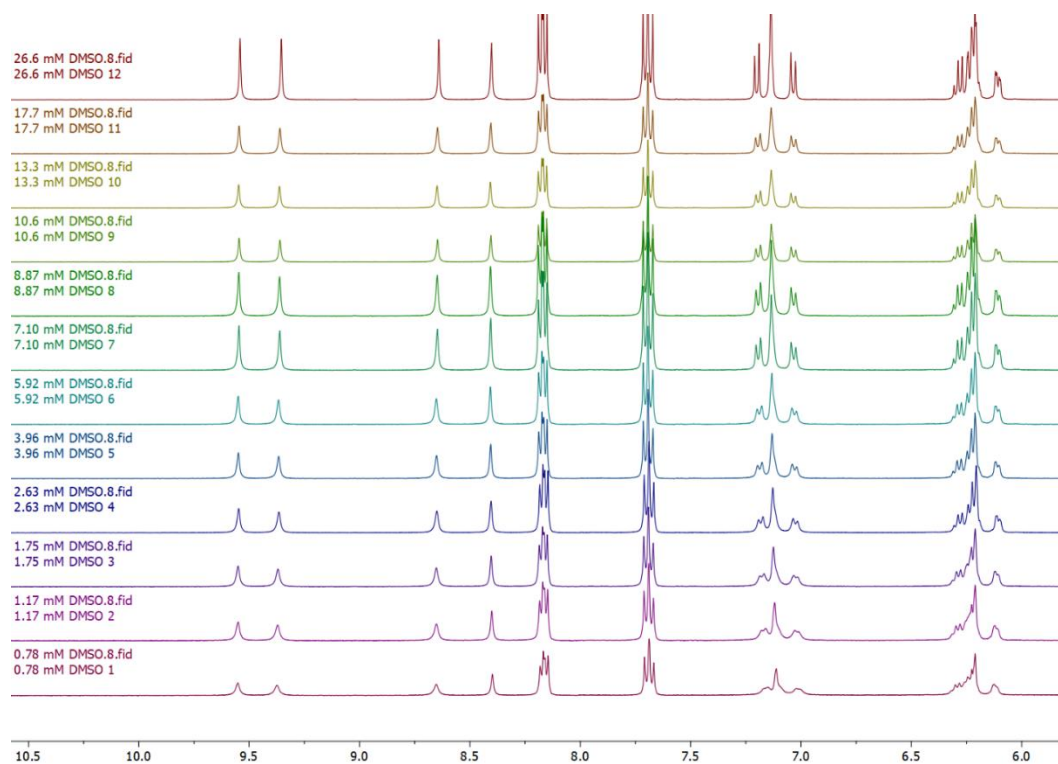

**Fig. S40:** Part of  $^1\text{H}$  NMR spectra for urea's hydrogen  $\text{NH}$  and aromatic region of **8a** in  $\text{DMSO-}d_6$ . The studied concentration range corresponds to 26.6 - 0.8 mM.

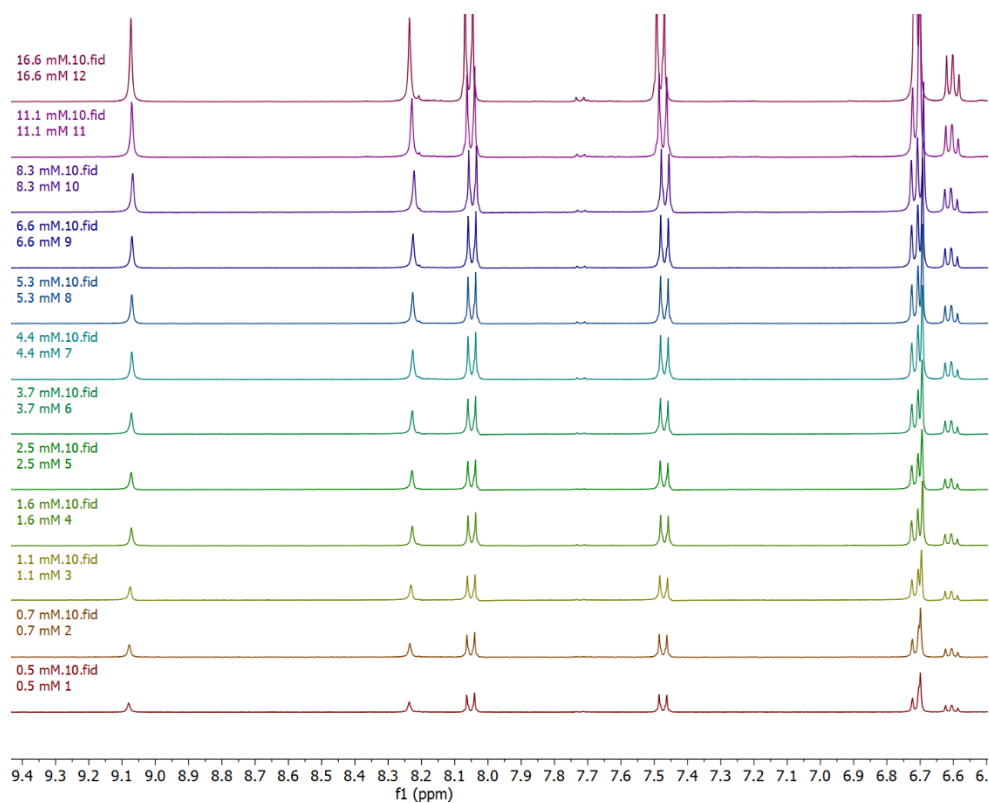

**Fig. S41:** Part of <sup>1</sup>H NMR spectra for urea's hydrogen NH and aromatic region of receptor **9** in DMSO-*d*<sub>6</sub>. The studied concentration range corresponds to 16.6 – 0.5 mM.

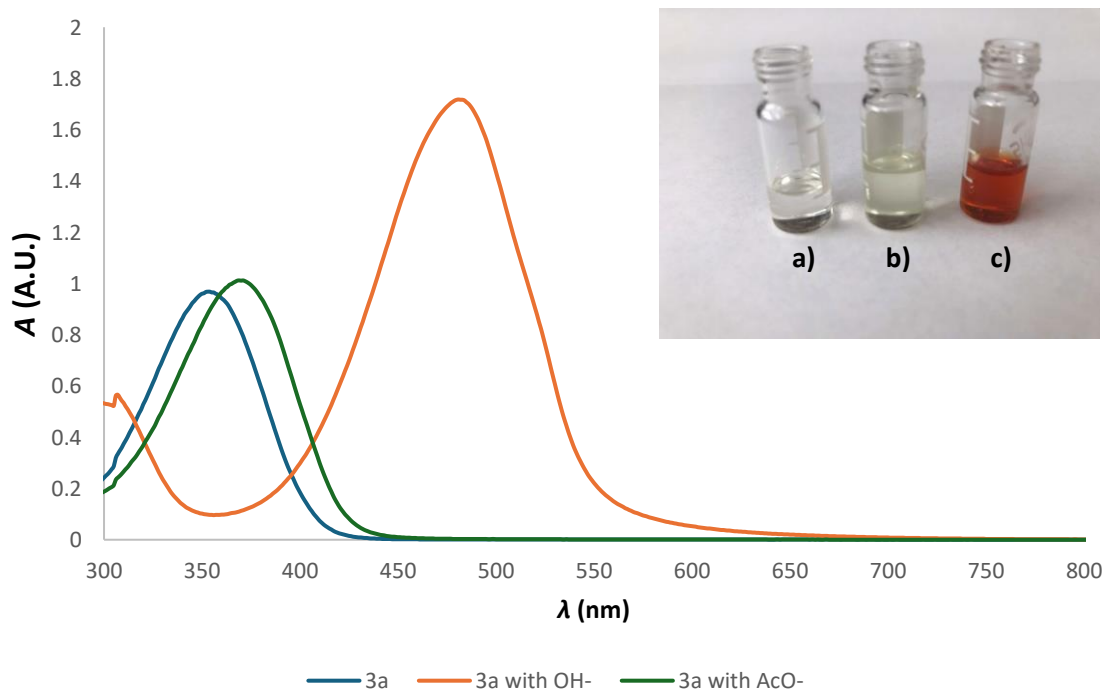

**Fig. S42:** Records of UV-Vis spectra collected in cuvette with 2-mm pathlength obtained for: **a)** blue nitro substituted urea receptor **3a** (0.31 mM in DMSO); **b)** green nitro substituted urea receptor **3a** (0.31 mM in DMSO) with TBAAcO; **c)** orange nitro substituted urea receptor **3a** (0.31 mM in DMSO) with TBAOH as an example of deprotonation.

#### 4. Job plot analysis

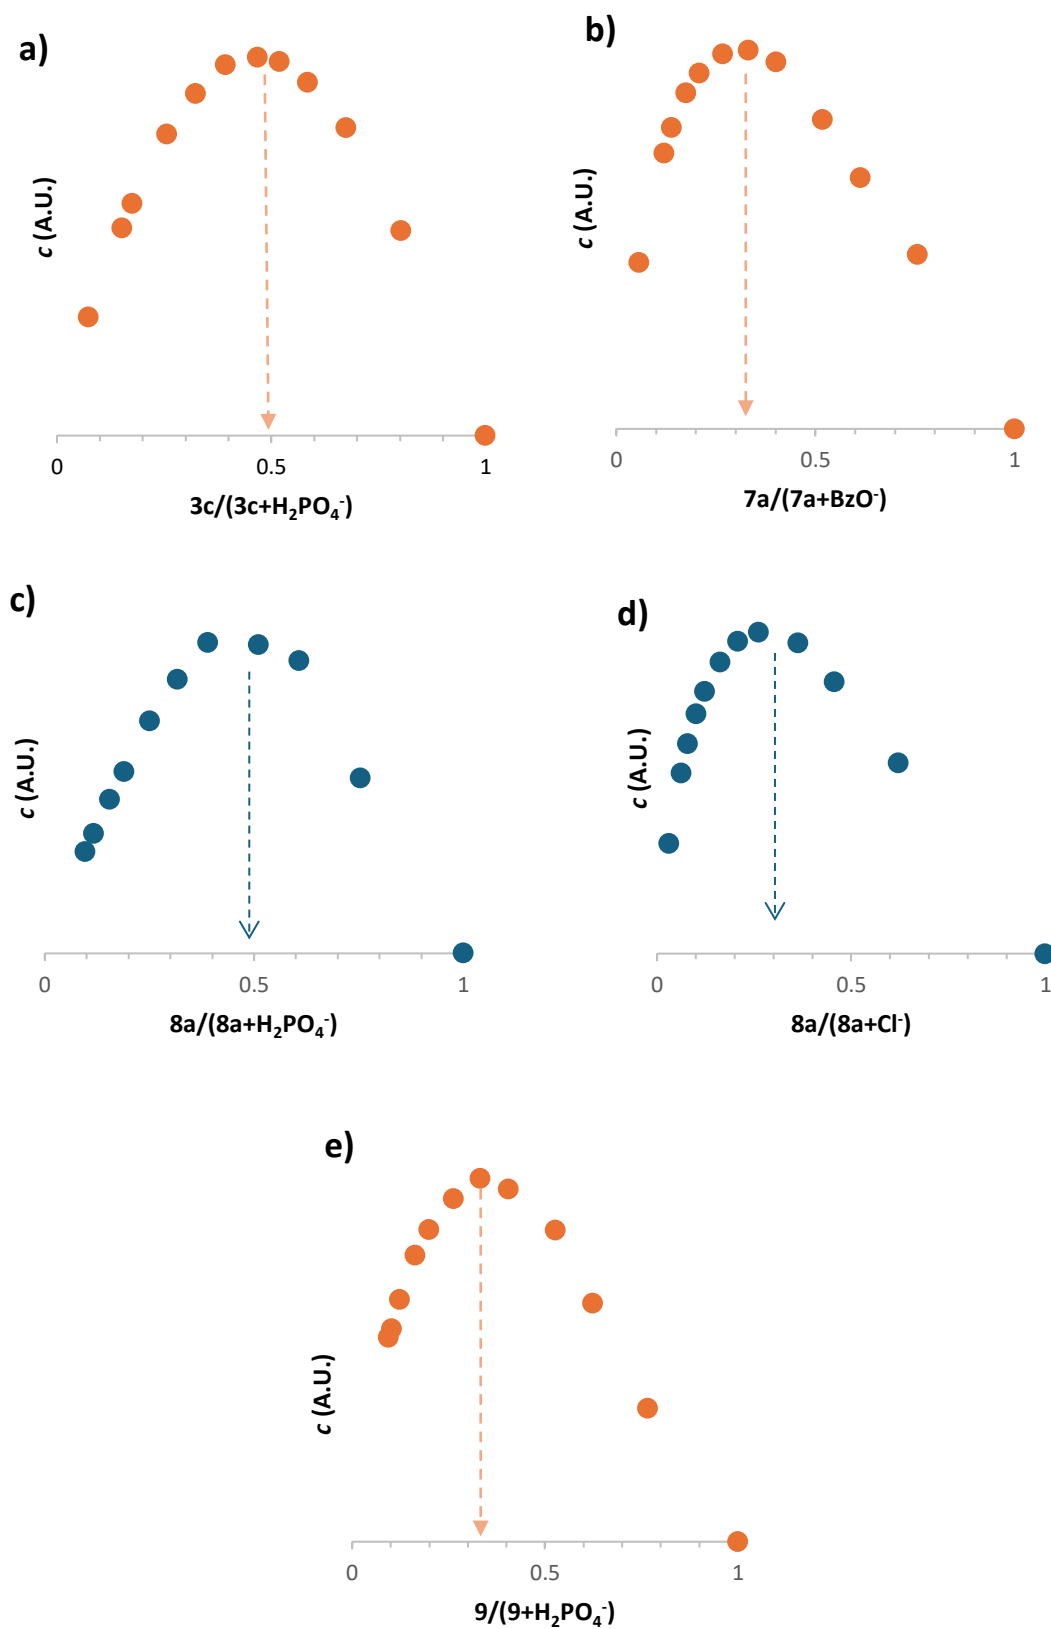

**Fig. S43 a-e):** Representative Job-plot records, obtained for several different urea-based receptors (built on calix[4]arene skeletons) *via*  $^1H$  NMR (400 MHz) titrations with corresponding TBA salts in  $DMSO-d_6$ . Arrows indicate the position of their maxima.



## 5. Titration experiments

| $c(\mathbf{3a})$ mM | $c(\text{H}_2\text{PO}_4^-)$ mM | $A_{400}$ (A.U.) |
|---------------------|---------------------------------|------------------|
| 0.272               | 0                               | 0.161            |
| 0.272               | 0.0636                          | 0.173            |
| 0.272               | 0.126                           | 0.195            |
| 0.272               | 0.187                           | 0.210            |
| 0.272               | 0.306                           | 0.236            |
| 0.272               | 0.420                           | 0.255            |
| 0.272               | 0.584                           | 0.278            |
| 0.272               | 0.838                           | 0.311            |
| 0.272               | 1.07                            | 0.331            |
| 0.272               | 1.48                            | 0.361            |
| 0.272               | 1.83                            | 0.380            |
| 0.272               | 2.14                            | 0.393            |

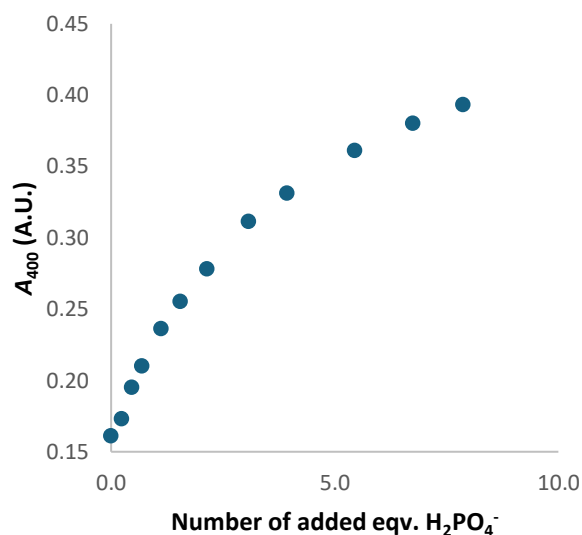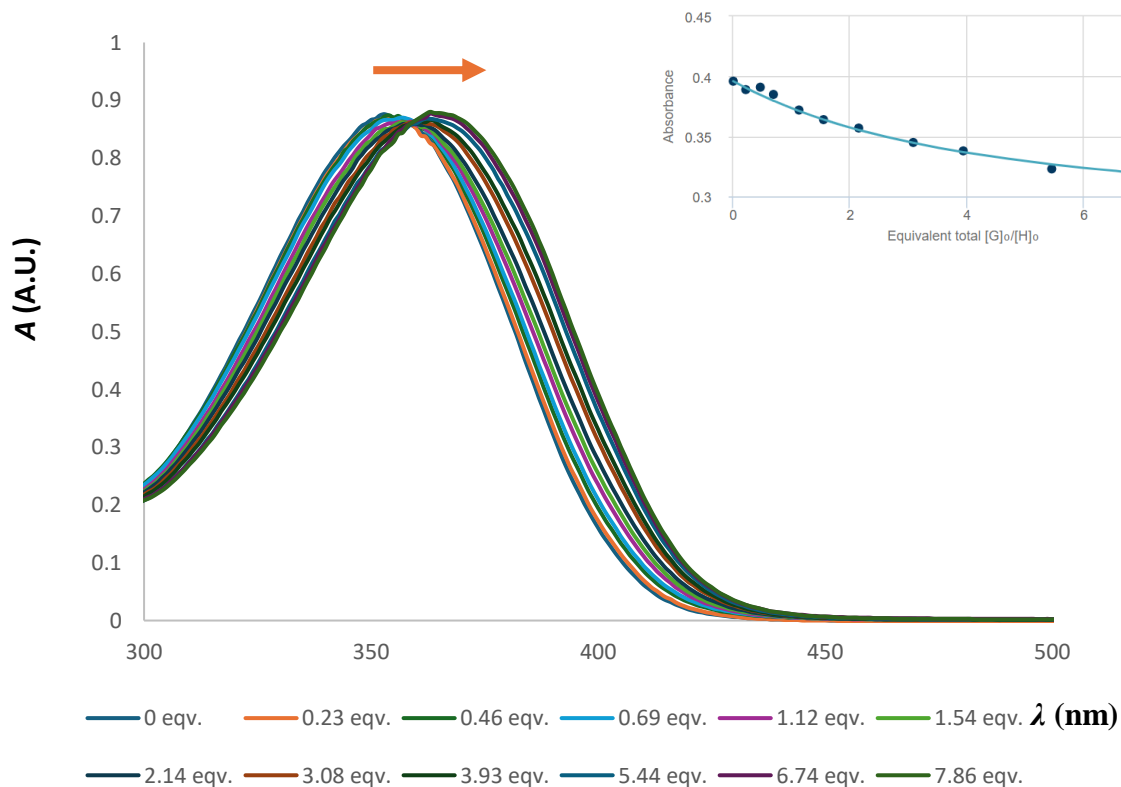

**Fig. S44:** Records of UV-Vis obtained for nitro substituted urea receptor **3a** (0.27 mM in DMSO) titrated with  $\text{TBAH}_2\text{PO}_4$  (final concentration 2.14 mM) in a cuvette with 2-mm pathlength. The arrow indicates the direction of a bathochromic shift. There is a diagnostic window of representative fit exported from BindFit.

**Link:** <http://app.supramolecular.org/bindfit/view/97cc9d00-1891-4ec4-b5d8-58bb0e96fb5e>

| $c$ ( <b>3a</b> ) mM | $c$ (AcO <sup>-</sup> ) mM | $A_{400}$ (A.U.) |
|----------------------|----------------------------|------------------|
| 0.306                | 0                          | 0.185            |
| 0.306                | 0.197                      | 0.265            |
| 0.306                | 0.390                      | 0.317            |
| 0.306                | 0.580                      | 0.354            |
| 0.306                | 0.948                      | 0.405            |
| 0.306                | 1.30                       | 0.436            |
| 0.306                | 1.81                       | 0.466            |
| 0.306                | 2.60                       | 0.488            |
| 0.306                | 3.32                       | 0.504            |
| 0.306                | 4.59                       | 0.52             |
| 0.306                | 5.69                       | 0.526            |
| 0.306                | 6.18                       | 0.529            |

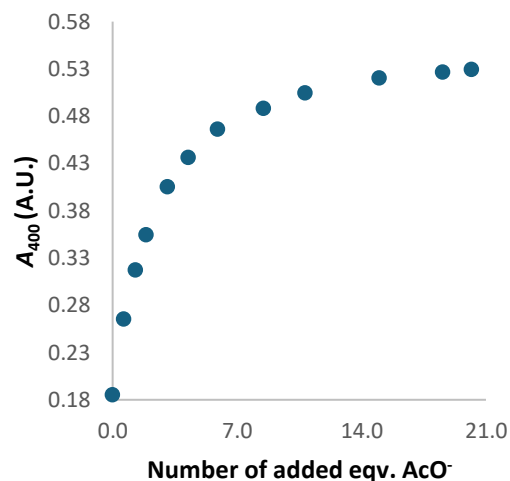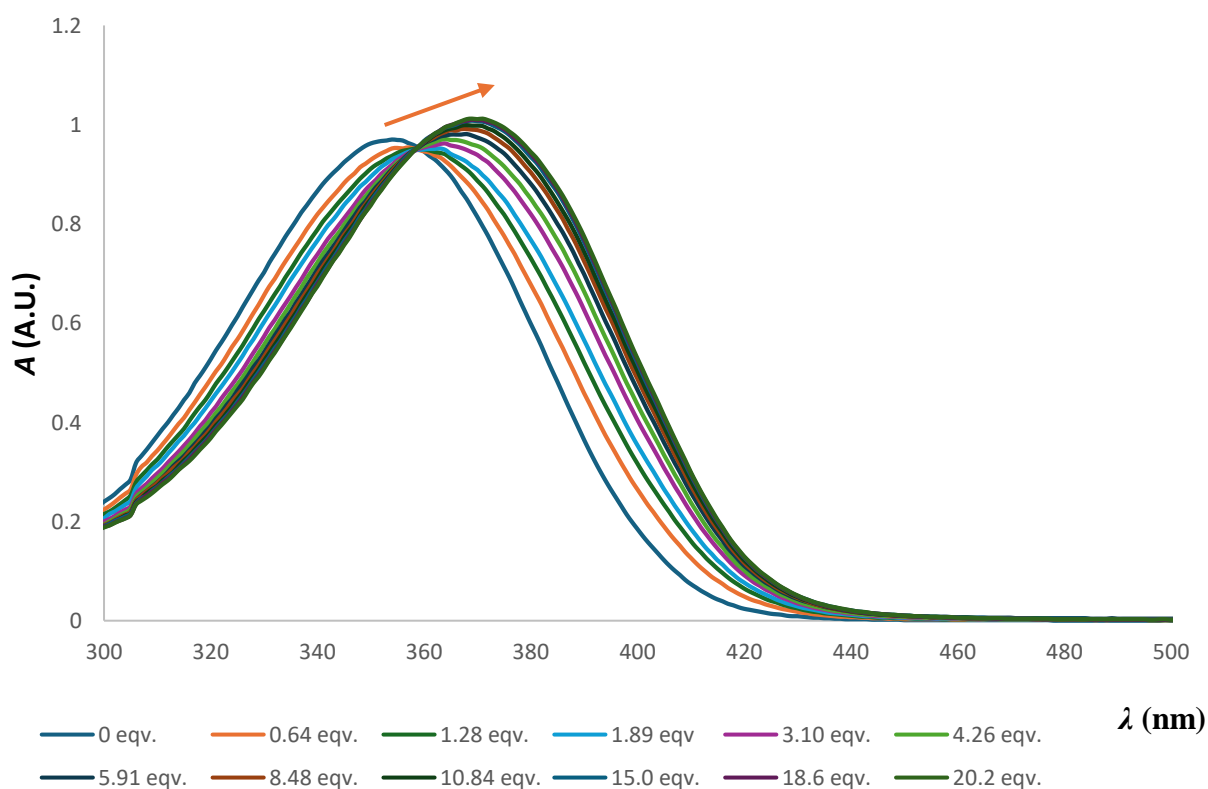

**Fig. S45:** Records of UV-Vis obtained for nitro substituted urea receptor **3a** (0.31 mM in DMSO) titrated with TBAAcO (final concentration 6.18 mM) in a cuvette with 2-mm pathlength. The arrow indicates the direction of a bathochromic shift.

| $c$ ( <b>3a</b> ) mM | $c$ (BzO <sup>-</sup> ) mM | $A_{400}$ (A.U.) |
|----------------------|----------------------------|------------------|
| 0.272                | 0                          | 0.161            |
| 0.272                | 0.112                      | 0.181            |
| 0.272                | 0.220                      | 0.200            |
| 0.272                | 0.324                      | 0.215            |
| 0.272                | 0.520                      | 0.242            |
| 0.272                | 0.703                      | 0.265            |
| 0.272                | 0.953                      | 0.285            |
| 0.272                | 1.32                       | 0.311            |
| 0.272                | 1.63                       | 0.326            |
| 0.272                | 2.15                       | 0.348            |
| 0.272                | 2.54                       | 0.362            |

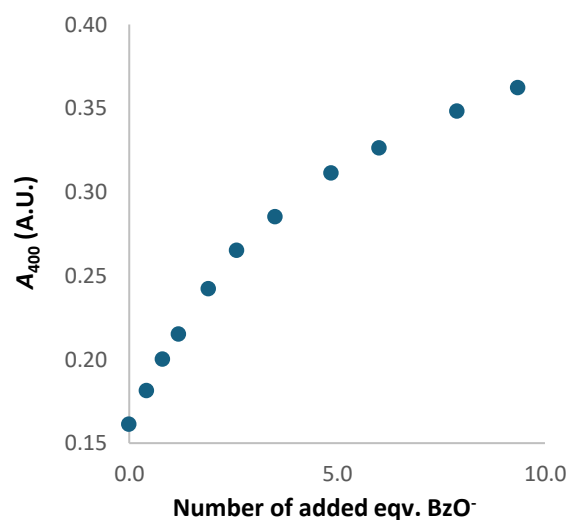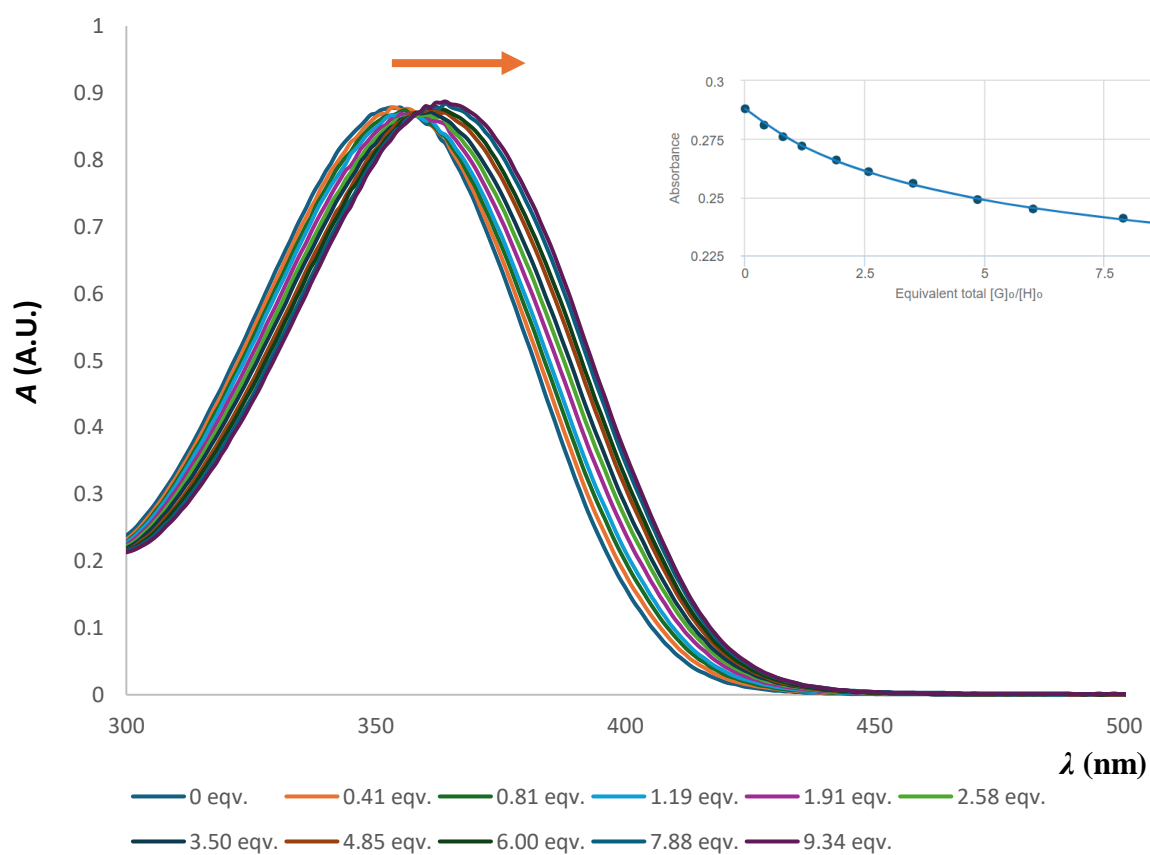

**Fig. S46:** Records of UV-Vis obtained for nitro substituted urea receptor **3a** (0.27 mM in DMSO) titrated with TBABzO (final concentration 2.54 mM) in a cuvette with 2-mm pathlength. The arrow indicates the direction of a bathochromic shift. There is a diagnostic window of representative fit exported from BindFit.

| $c$ ( <b>3a</b> ) mM | $c$ (Cl <sup>-</sup> ) mM | $\delta_{\text{NH}}$ (ppm) |
|----------------------|---------------------------|----------------------------|
| 3.40                 | 0                         | 9.5560                     |
| 3.40                 | 2.01                      | 9.6924                     |
| 3.40                 | 3.95                      | 9.8229                     |
| 3.40                 | 5.82                      | 9.9349                     |
| 3.40                 | 9.34                      | 10.1142                    |
| 3.40                 | 12.6                      | 10.2504                    |
| 3.40                 | 17.1                      | 10.4025                    |
| 3.40                 | 23.7                      | 10.5688                    |
| 3.40                 | 29.4                      | 10.6781                    |
| 3.40                 | 38.5                      | 10.8102                    |
| 3.40                 | 45.7                      | 10.8858                    |
| 3.40                 | 103                       | 11.1917                    |

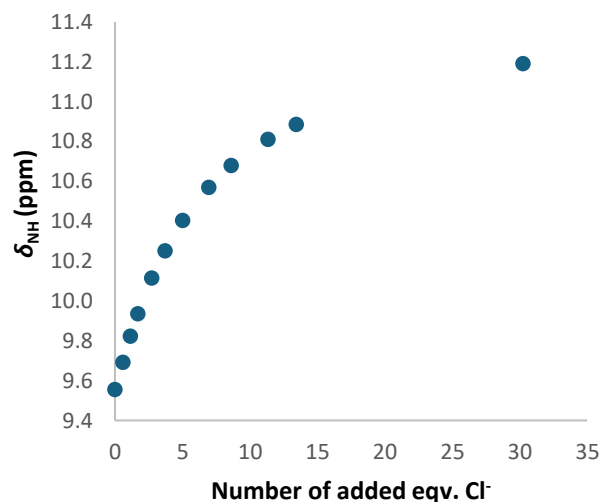

**Link:**

<http://app.supramolecular.org/bindfit/view/cd0ada6e-6738-4fe5-a1ac-877367e024dd>

| $c$ ( <b>3a</b> ) mM | $c$ (HSO <sub>4</sub> <sup>-</sup> ) mM | $\delta_{\text{NH}}$ (ppm) |
|----------------------|-----------------------------------------|----------------------------|
| 4.39                 | 0                                       | 9.5494                     |
| 4.39                 | 5.97                                    | 9.5640                     |
| 4.39                 | 11.7                                    | 9.5825                     |
| 4.39                 | 17.2                                    | 9.5964                     |
| 4.39                 | 27.7                                    | 9.6217                     |
| 4.39                 | 37.4                                    | 9.6440                     |
| 4.39                 | 50.7                                    | 9.6733                     |
| 4.39                 | 70.2                                    | 9.7108                     |
| 4.39                 | 86.9                                    | 9.7413                     |
| 4.39                 | 114                                     | 9.7852                     |
| 4.39                 | 149                                     | 9.8294                     |
| 4.39                 | 304                                     | 9.9560                     |

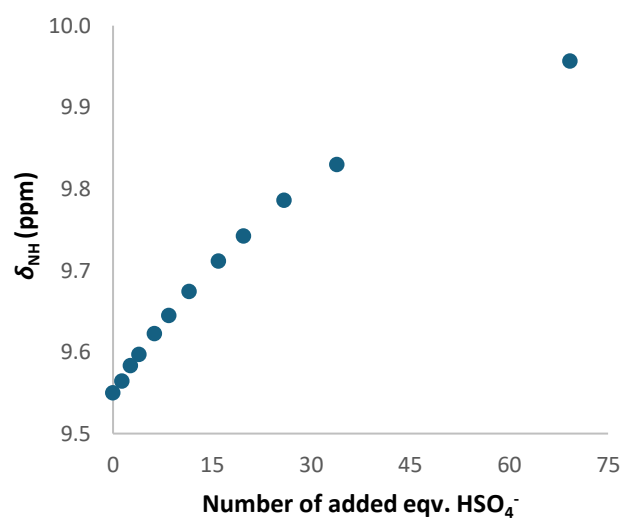

**Link:**

<http://app.supramolecular.org/bindfit/view/1bbdaa74-e561-4c7c-b6e4-c83c8f331828>

| $c$ ( <b>3b</b> ) mM | $c$ ( $\text{H}_2\text{PO}_4^-$ ) mM | $\delta_{\text{NH}}$ (ppm) |
|----------------------|--------------------------------------|----------------------------|
| 0.185                | 0                                    | 9.21                       |
| 0.185                | 0.0982                               | 9.27                       |
| 0.185                | 0.193                                | 9.39                       |
| 0.185                | 0.285                                | 9.51                       |
| 0.185                | 0.461                                | 9.77                       |
| 0.185                | 0.626                                | 9.96                       |
| 0.185                | 0.856                                | 10.18                      |
| 0.185                | 1.20                                 | 10.41                      |
| 0.185                | 1.50                                 | 10.57                      |
| 0.185                | 2.00                                 | 10.73                      |
| 0.185                | 2.40                                 | 10.80                      |
| 0.185                | 5.99                                 | 11.22                      |

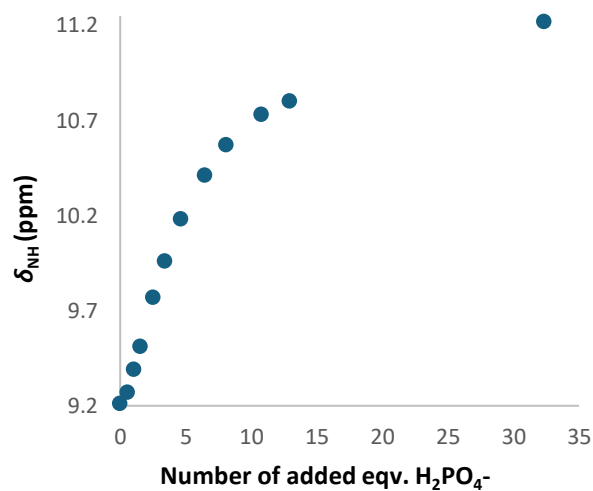

**Link:**

<http://app.supramolecular.org/bindfit/view/b34bd805-645d-4b45-a8a1-7c7d88f7fbee>

| $c$ ( <b>3c</b> ) mM | $c$ ( $\text{H}_2\text{PO}_4^-$ ) mM | $\delta_{\text{NH}}$ (ppm) |
|----------------------|--------------------------------------|----------------------------|
| 3.22                 | 0                                    | 8.7269                     |
| 3.22                 | 0.789                                | 9.0108                     |
| 3.22                 | 1.55                                 | 9.235                      |
| 3.22                 | 2.28                                 | 9.399                      |
| 3.22                 | 2.98                                 | 9.5287                     |
| 3.22                 | 3.66                                 | 9.6269                     |
| 3.22                 | 4.94                                 | 9.7737                     |
| 3.22                 | 6.71                                 | 9.9020                     |
| 3.22                 | 9.29                                 | 10.0324                    |
| 3.22                 | 15.1                                 | 10.1992                    |
| 3.22                 | 17.9                                 | 10.2415                    |
| 3.22                 | 40.3                                 | 10.5123                    |

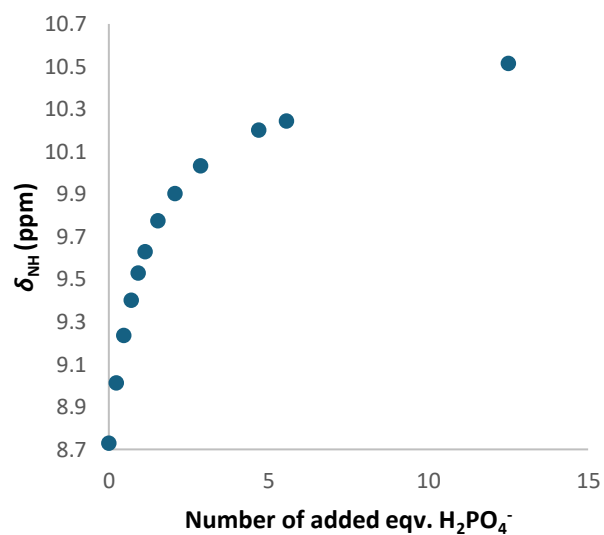

**Link:**

<http://app.supramolecular.org/bindfit/view/d0359634-581a-4003-b650-4933808818a0>

| $c$ ( <b>3d</b> ) mM | $c$ ( $\text{H}_2\text{PO}_4^-$ ) mM | $\delta_{\text{NH}}$ (ppm) |
|----------------------|--------------------------------------|----------------------------|
| 4.52                 | 0                                    | 8.6105                     |
| 4.52                 | 2.57                                 | 9.1741                     |
| 4.52                 | 5.04                                 | 9.5522                     |
| 4.52                 | 7.41                                 | 9.7774                     |
| 4.52                 | 9.70                                 | 9.9192                     |
| 4.52                 | 11.9                                 | 10.021                     |
| 4.52                 | 16.1                                 | 10.1432                    |
| 4.52                 | 20.0                                 | 10.2294                    |
| 4.52                 | 25.4                                 | 10.296                     |
| 4.52                 | 33.2                                 | 10.364                     |
| 4.52                 | 45.9                                 | 10.4369                    |
| 4.52                 | 59.8                                 | 10.4693                    |
| 4.52                 | 131                                  | 10.5562                    |

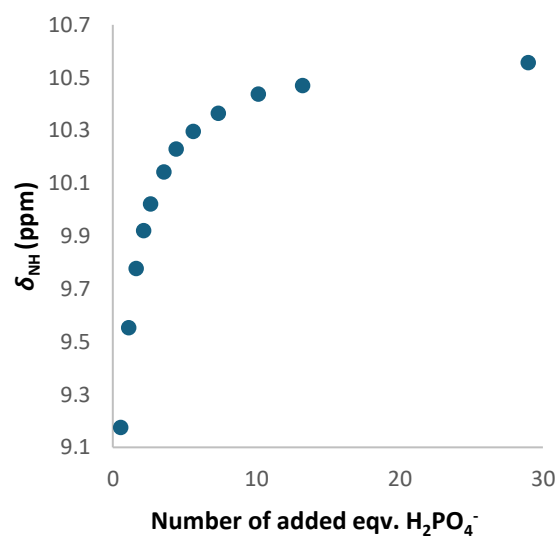

**Link:**

<http://app.supramolecular.org/bindfit/view/f674b4d1-562f-4dab-8311-a163b6b3e6e0>

| $c$ ( <b>4</b> ) mM | $c$ (AcO <sup>-</sup> ) mM | $A_{400}$ (A.U.) |
|---------------------|----------------------------|------------------|
| 0.276               | 0                          | 0.180            |
| 0.276               | 0.083                      | 0.200            |
| 0.276               | 0.165                      | 0.219            |
| 0.276               | 0.246                      | 0.236            |
| 0.276               | 0.404                      | 0.265            |
| 0.276               | 0.559                      | 0.29             |
| 0.276               | 0.783                      | 0.316            |
| 0.276               | 1.14                       | 0.346            |
| 0.276               | 1.47                       | 0.366            |
| 0.276               | 2.09                       | 0.388            |
| 0.276               | 2.64                       | 0.399            |

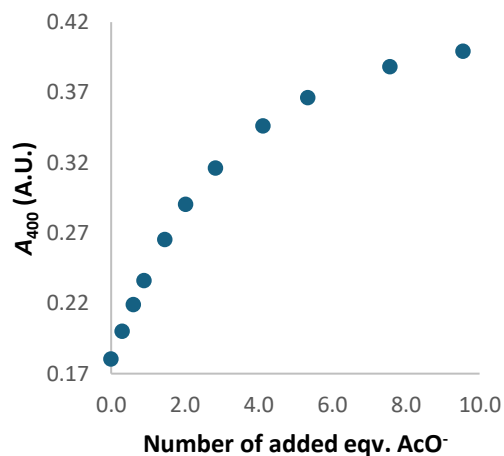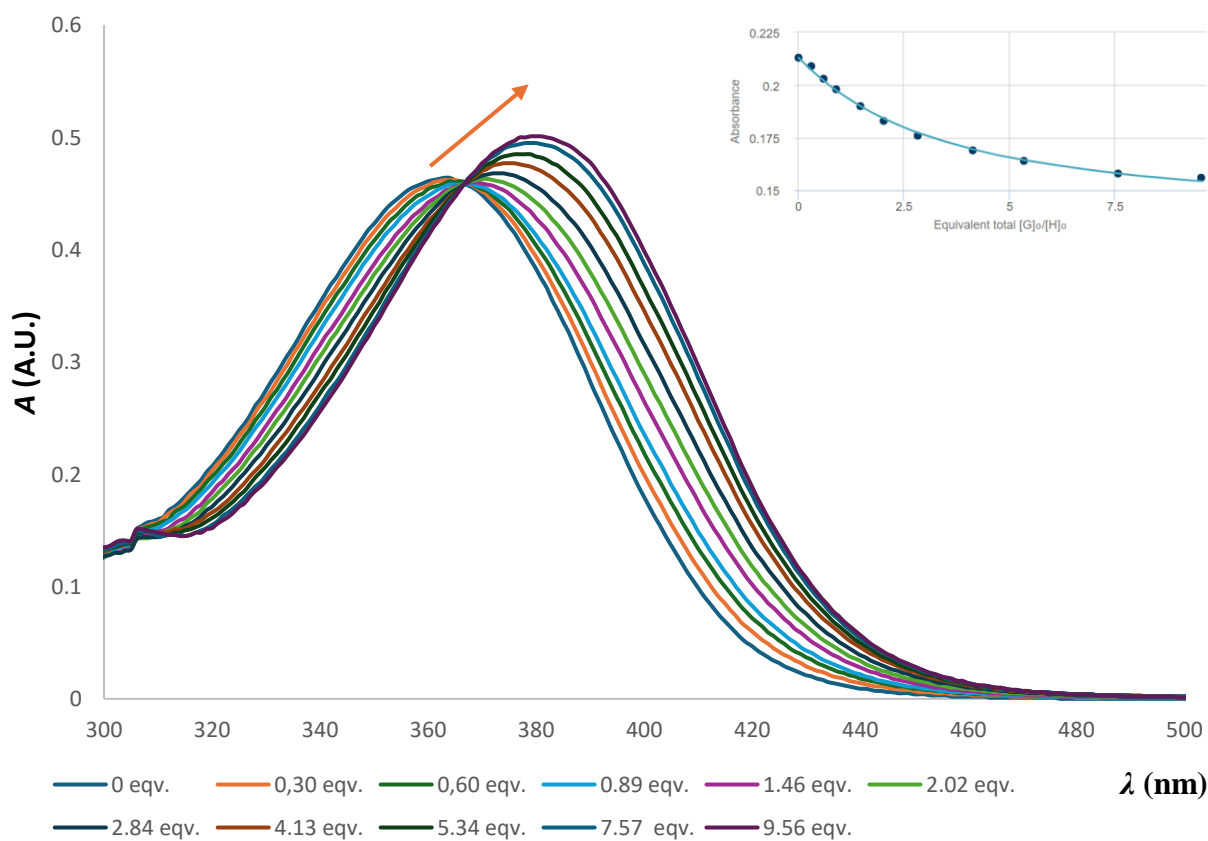

**Fig. S47:** Records of UV-Vis obtained for nitro substituted urea receptor **4** (0.28 mM in DMSO) titrated with TBABzO (final concentration 2.64 mM) in a cuvette with 1-mm pathlength. The arrow indicates the direction of a bathochromic shift. There is a diagnostic window of representative fit exported from BindFit.

| $c$ (4) mM | $c$ (BzO <sup>-</sup> ) mM | $A_{400}$ (A.U.) |
|------------|----------------------------|------------------|
| 0.276      | 0                          | 0.170            |
| 0.276      | 0.113                      | 0.189            |
| 0.276      | 0.222                      | 0.207            |
| 0.276      | 0.327                      | 0.222            |
| 0.276      | 0.525                      | 0.246            |
| 0.276      | 0.709                      | 0.261            |
| 0.276      | 0.963                      | 0.280            |
| 0.276      | 1.33                       | 0.302            |
| 0.276      | 1.65                       | 0.315            |
| 0.276      | 2.17                       | 0.328            |
| 0.276      | 5.78                       | 0.391            |

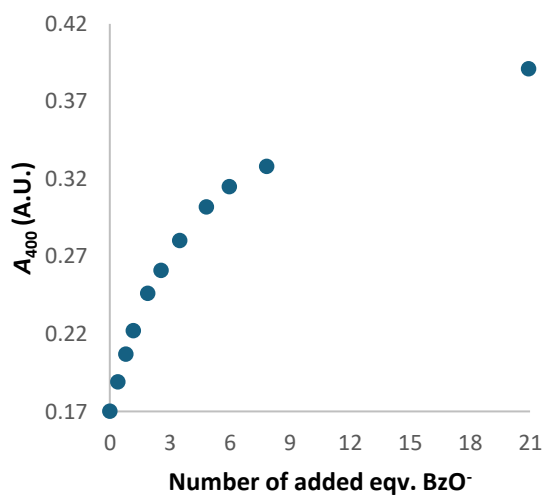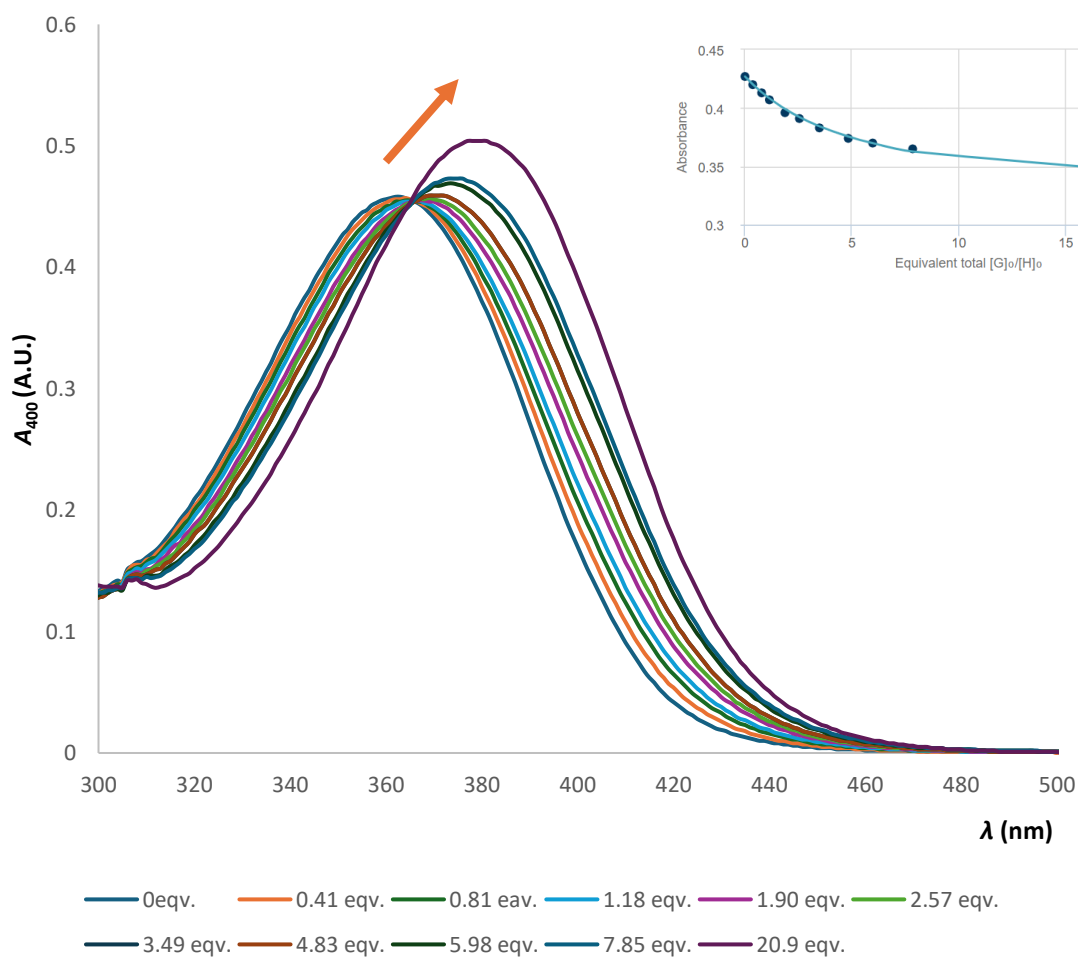

**Fig. S48:** Records of UV-Vis obtained for nitro substituted urea receptor **4** (0.28 mM in DMSO) titrated with TBABzO (final concentration 5.78 mM) in a cuvette with 1-mm pathlength. The arrow indicates the direction of a bathochromic shift. There is a diagnostic window of representative fit exported from BindFit.



| $c$ (4) mM | $c$ (Cl <sup>-</sup> ) mM | $\delta_{\text{NH}}$ (ppm) |
|------------|---------------------------|----------------------------|
| 3.47       | 0                         | 9.1715                     |
| 3.47       | 2.05                      | 9.3010                     |
| 3.47       | 4.03                      | 9.4165                     |
| 3.47       | 5.93                      | 9.5093                     |
| 3.47       | 9.52                      | 9.6663                     |
| 3.47       | 12.9                      | 9.7905                     |
| 3.47       | 17.5                      | 9.9344                     |
| 3.47       | 24.2                      | 10.1001                    |
| 3.47       | 29.9                      | 10.2091                    |
| 3.47       | 39.3                      | 10.3474                    |
| 3.47       | 49.6                      | 10.4481                    |
| 3.47       | 105                       | 10.7969                    |

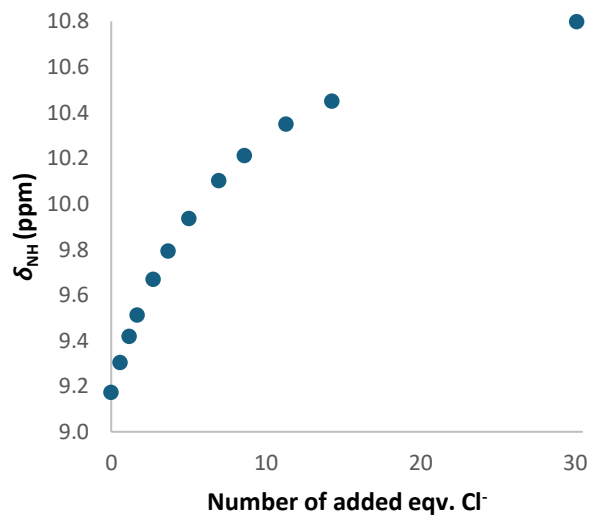

Link:

<http://app.supramolecular.org/bindfit/view/35659b87-a2e3-4083-aaa1-970faff60cb0>

| $c$ (4) mM | $c$ (HSO <sub>4</sub> <sup>-</sup> ) mM | $\delta_{\text{NH}}$ (ppm) |
|------------|-----------------------------------------|----------------------------|
| 5.87       | 0                                       | 9.1686                     |
| 5.87       | 5.72                                    | 9.2203                     |
| 5.87       | 11.2                                    | 9.2549                     |
| 5.87       | 16.5                                    | 9.2843                     |
| 5.87       | 26.5                                    | 9.3313                     |
| 5.87       | 35.9                                    | 9.3706                     |
| 5.87       | 48.7                                    | 9.4223                     |
| 5.87       | 67.4                                    | 9.4889                     |
| 5.87       | 83.4                                    | 9.5423                     |
| 5.87       | 109                                     | 9.6177                     |
| 5.87       | 144                                     | 9.7004                     |
| 5.87       | 292                                     | 9.9040                     |

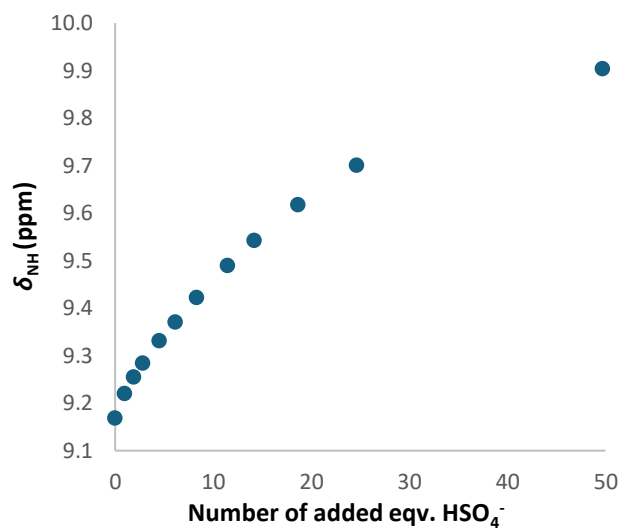

Link:

<http://app.supramolecular.org/bindfit/view/bbd1e8d0-59a5-4d73-9579-d464e7405564>

| $c$ (7a) mM | $c$ ( $\text{H}_2\text{PO}_4^-$ ) mM | $\delta_{\text{NH}}$ (ppm) |
|-------------|--------------------------------------|----------------------------|
| 0.229       | 0                                    | 9.6069                     |
| 0.229       | 0.118                                | 9.8349                     |
| 0.229       | 0.231                                | 10.0231                    |
| 0.229       | 0.340                                | 10.180                     |
| 0.229       | 0.546                                | 10.489                     |
| 0.229       | 0.738                                | 10.708                     |
| 0.229       | 1.00                                 | 10.934                     |
| 0.229       | 1.39                                 | 11.166                     |
| 0.229       | 1.72                                 | 11.318                     |
| 0.229       | 2.25                                 | 11.450                     |
| 0.229       | 2.67                                 | 11.560                     |
| 0.229       | 6.01                                 | 11.849                     |

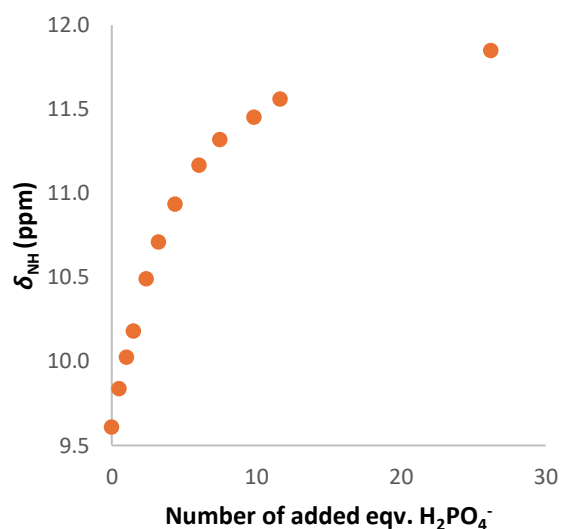

Link:

<http://app.supramolecular.org/bindfit/view/a332e095-ef92-499b-a074-dd18aa318dc9>

| $c$ (7a) mM | $c$ ( $\text{BzO}^-$ ) mM | $\delta_{\text{NH}}$ (ppm) |
|-------------|---------------------------|----------------------------|
| 0.344       | 0                         | 9.5989                     |
| 0.344       | 0.133                     | 9.8239                     |
| 0.344       | 0.260                     | 9.9989                     |
| 0.344       | 0.383                     | 10.1819                    |
| 0.344       | 0.615                     | 10.4920                    |
| 0.344       | 0.831                     | 10.7139                    |
| 0.344       | 1.13                      | 10.9677                    |
| 0.344       | 1.56                      | 11.2622                    |
| 0.344       | 1.93                      | 11.4650                    |
| 0.344       | 2.54                      | 11.7044                    |
| 0.344       | 3.01                      | 11.8315                    |
| 0.344       | 6.77                      | 12.4318                    |

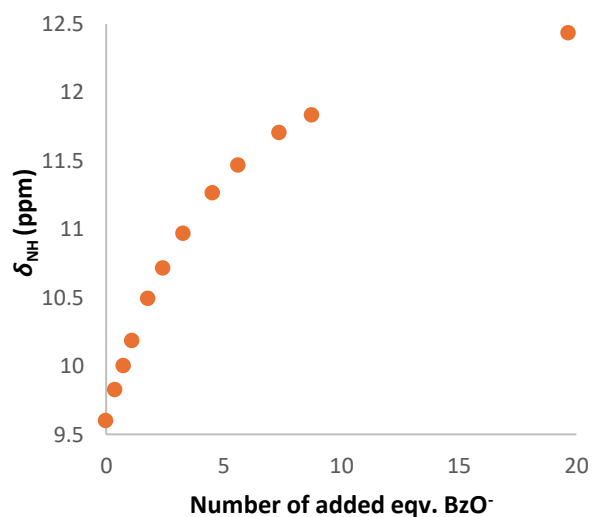

Link:

<http://app.supramolecular.org/bindfit/view/32b2bbd9-4e94-49f7-ba0b-b95f207b116c>

| $c$ ( <b>7a</b> ) mM | $c$ (AcO <sup>-</sup> ) mM | $\delta_{\text{NH}}$ (ppm) |
|----------------------|----------------------------|----------------------------|
| 0.229                | 0                          | 9.6305                     |
| 0.229                | 0.163                      | 10.0071                    |
| 0.229                | 0.319                      | 10.3405                    |
| 0.229                | 0.469                      | 10.6211                    |
| 0.229                | 0.754                      | 11.1409                    |
| 0.229                | 1.02                       | 11.4883                    |
| 0.229                | 1.38                       | 11.8202                    |
| 0.229                | 1.91                       | 12.0981                    |
| 0.229                | 2.37                       | 12.2701                    |
| 0.229                | 3.11                       | 12.4516                    |
| 0.229                | 3.69                       | 12.5395                    |
| 0.229                | 8.29                       | 12.8357                    |

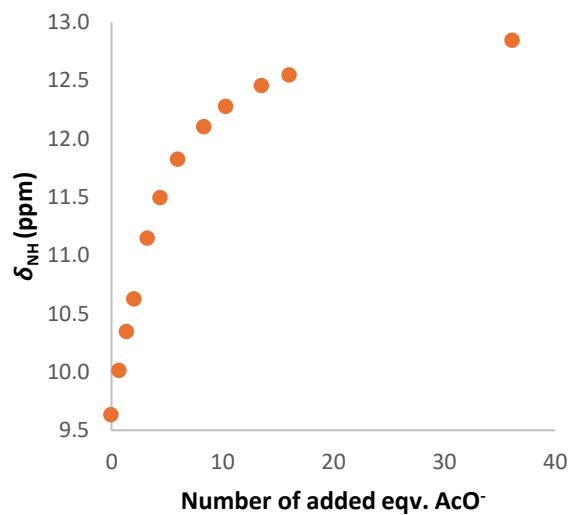

**Link:**

<http://app.supramolecular.org/bindfit/view/a086255e-be72-43c2-a274-ca5c4e64690c>

| $c$ ( <b>8a</b> ) mM | $c$ ( $\text{H}_2\text{PO}_4^-$ ) mM | $A_{390}$ (A.U.) |
|----------------------|--------------------------------------|------------------|
| 0.214                | 0                                    | 0.368            |
| 0.214                | 0.0700                               | 0.434            |
| 0.214                | 0.139                                | 0.505            |
| 0.214                | 0.206                                | 0.54             |
| 0.214                | 0.337                                | 0.595            |
| 0.214                | 0.463                                | 0.614            |
| 0.214                | 0.643                                | 0.632            |
| 0.214                | 0.922                                | 0.642            |
| 0.214                | 1.18                                 | 0.652            |
| 0.214                | 1.63                                 | 0.661            |
| 0.214                | 2.02                                 | 0.668            |
| 0.214                | 2.19                                 | 0.670            |

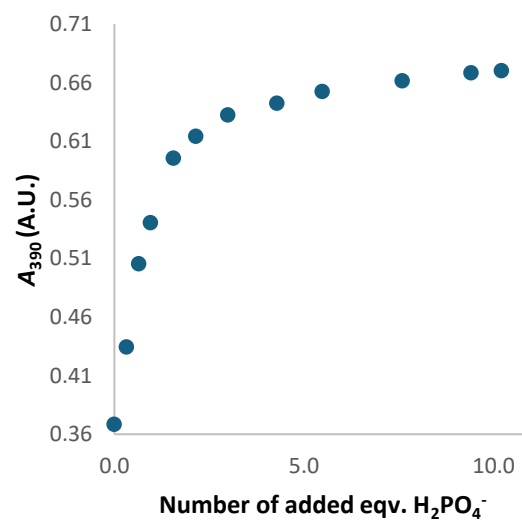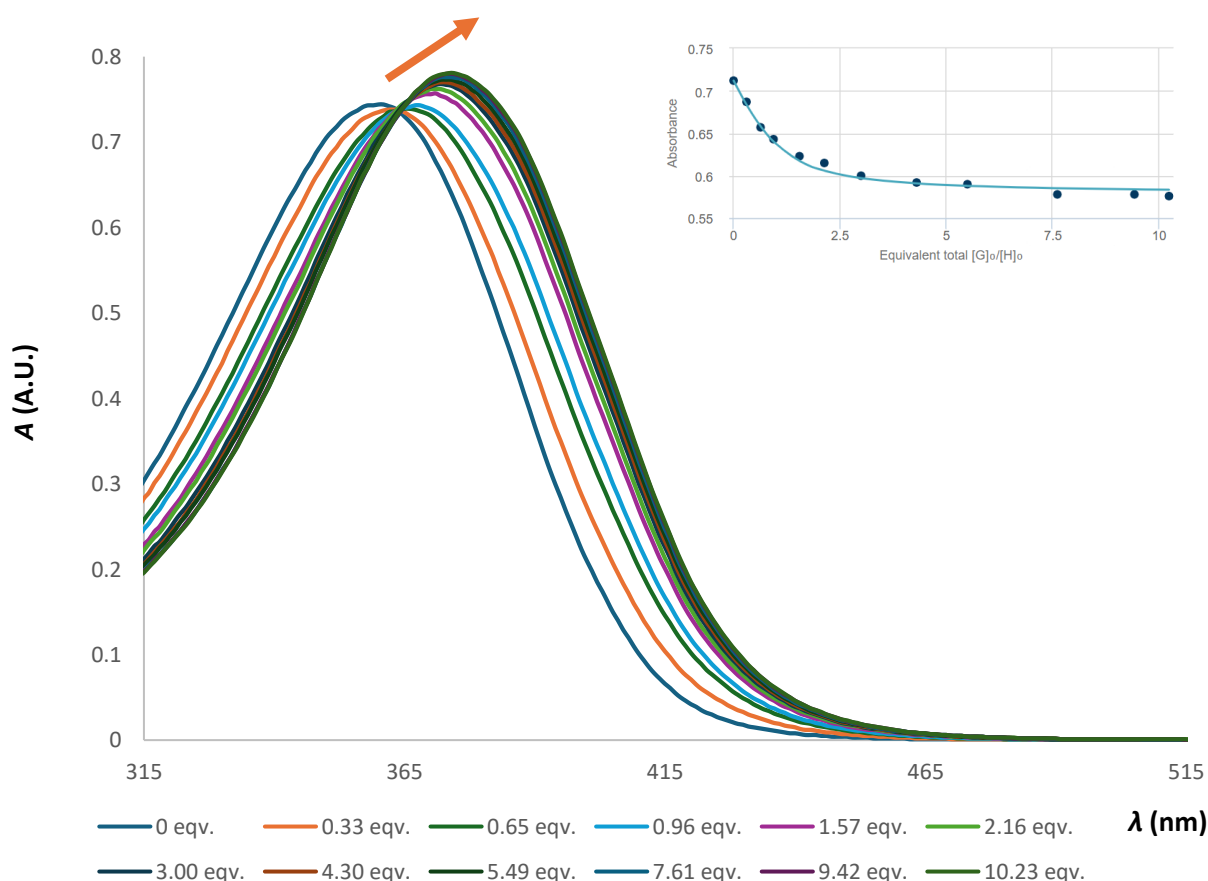

**Fig. S49:** Records of UV-Vis obtained for nitro substituted urea receptor **8a** (0.21 mM in DMSO) titrated with  $\text{TBAH}_2\text{PO}_4$  (final concentration 2.19 mM) in a cuvette with 1-mm pathlength. The arrow indicates the direction of a bathochromic shift. There is a diagnostic window of representative fit exported from BindFit.

| $c$ ( <b>8a</b> ) mM | $c$ (AcO <sup>-</sup> ) mM | $A_{390}$ (A.U.) |
|----------------------|----------------------------|------------------|
| 0.214                | 0                          | 0.369            |
| 0.214                | 0.0653                     | 0.416            |
| 0.214                | 0.130                      | 0.458            |
| 0.214                | 0.194                      | 0.494            |
| 0.214                | 0.320                      | 0.539            |
| 0.214                | 0.444                      | 0.568            |
| 0.214                | 0.625                      | 0.596            |
| 0.214                | 0.859                      | 0.617            |
| 0.214                | 1.19                       | 0.642            |
| 0.214                | 1.41                       | 0.656            |
| 0.214                | 1.71                       | 0.668            |
| 0.214                | 1.91                       | 0.672            |
| 0.214                | 2.19                       | 0.683            |
| 0.214                | 2.63                       | 0.693            |

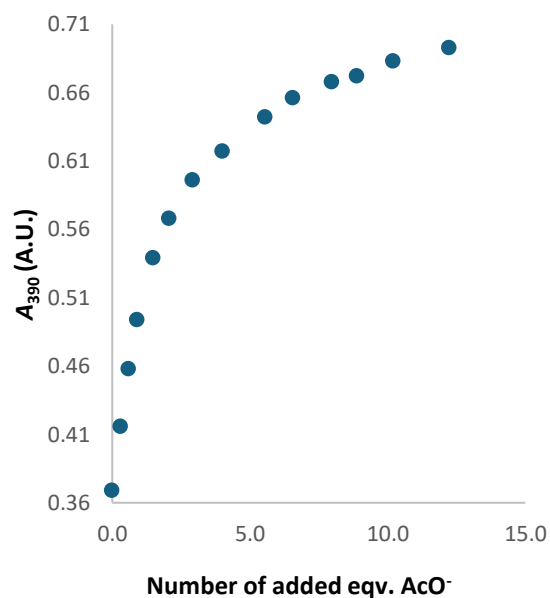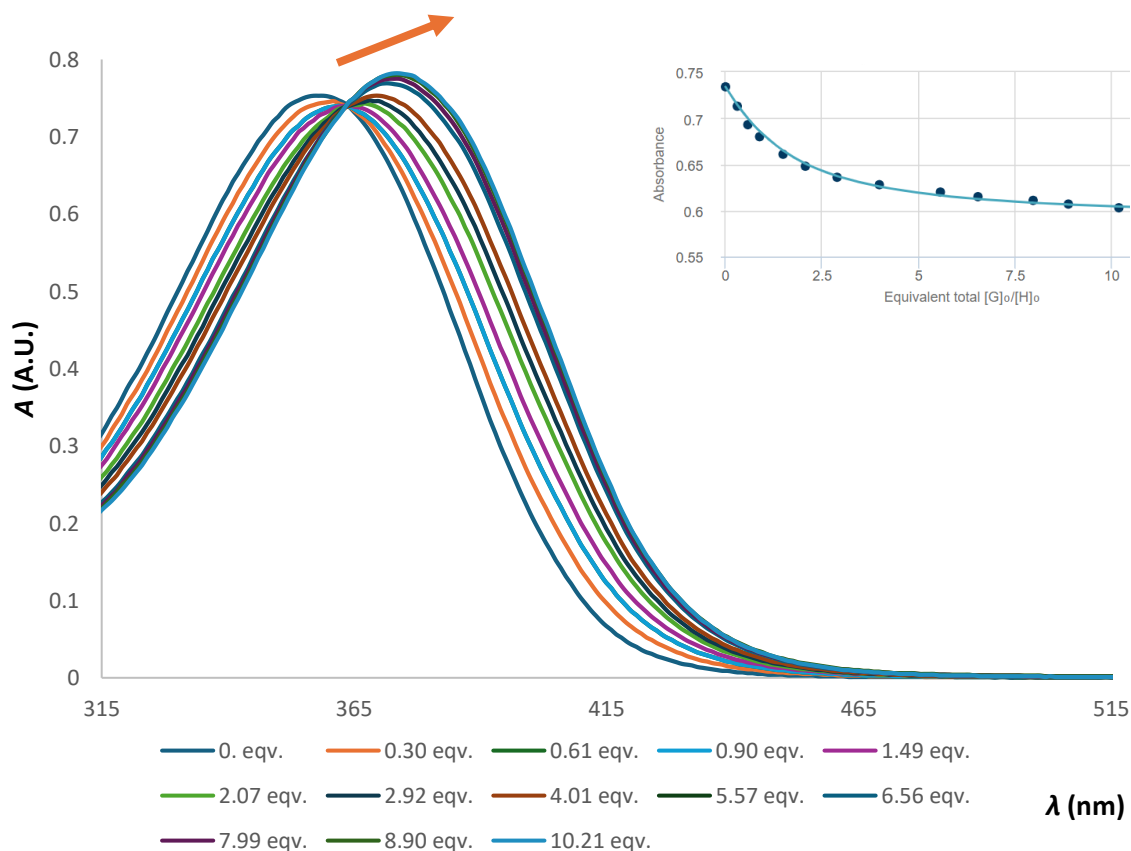

**Fig. S50:** Records of UV-Vis obtained for nitro substituted urea receptor **8a** (0.21 mM in DMSO) titrated with TBAACO (final concentration 2.63 mM) in a cuvette with 1-mm pathlength. The arrow indicates the direction of a bathochromic shift. There is a diagnostic window of representative fit exported from BindFit.

| $c$ ( <b>8a</b> ) mM | $c$ (BzO <sup>-</sup> ) mM | $A_{390}$ (A.U.) |
|----------------------|----------------------------|------------------|
| 0.208                | 0                          | 0.357            |
| 0.208                | 0.0599                     | 0.39             |
| 0.208                | 0.119                      | 0.412            |
| 0.208                | 0.176                      | 0.428            |
| 0.208                | 0.288                      | 0.456            |
| 0.208                | 0.396                      | 0.478            |
| 0.208                | 0.550                      | 0.499            |
| 0.208                | 0.789                      | 0.528            |
| 0.208                | 1.01                       | 0.545            |
| 0.208                | 1.40                       | 0.570            |
| 0.208                | 1.73                       | 0.584            |
| 0.208                | 1.88                       | 0.590            |

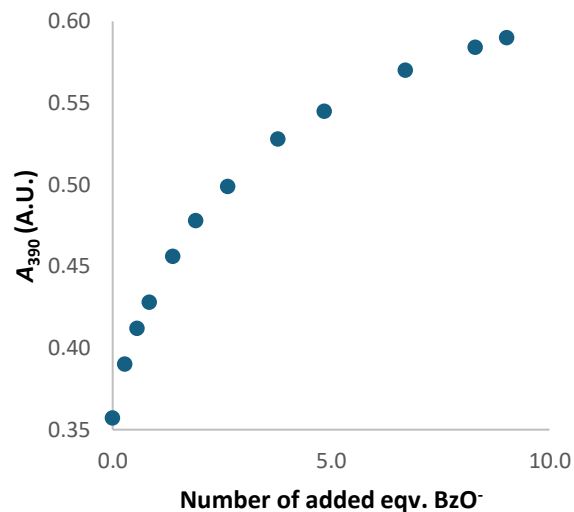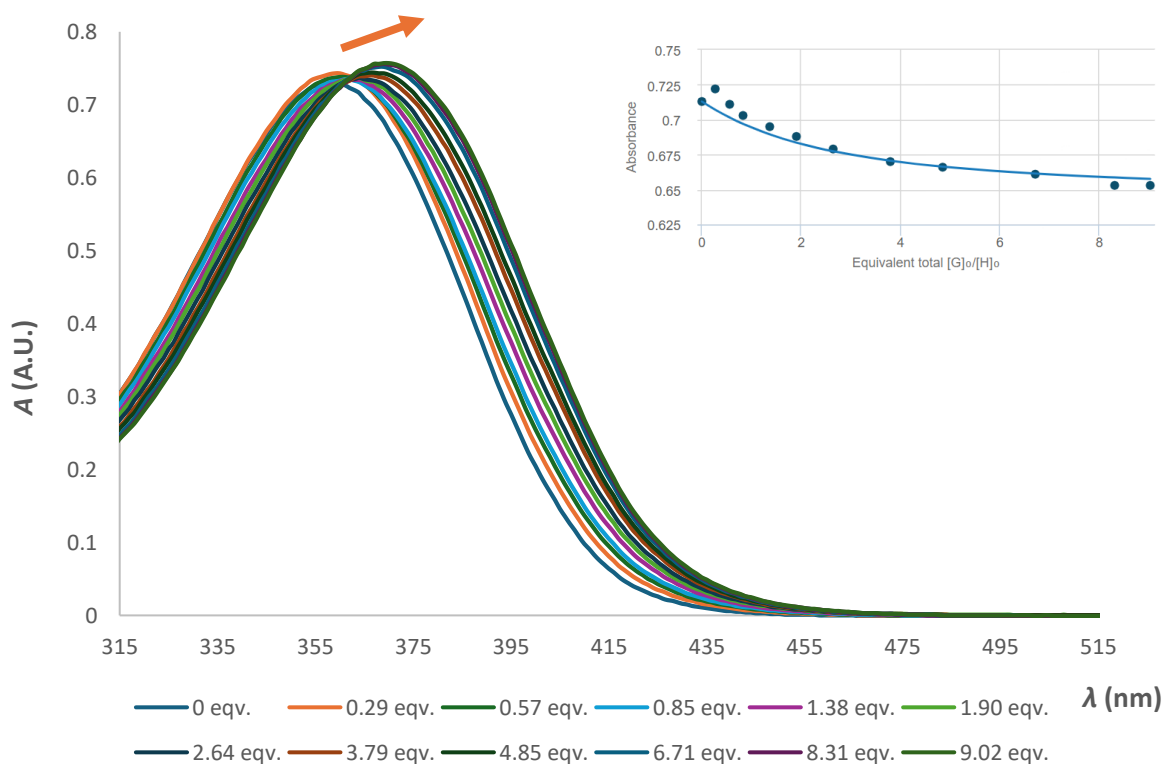

**Fig. S51:** Records of UV-Vis obtained for nitro substituted urea receptor **8a** (0.21 mM in DMSO) titrated with TBABzO (final concentration 1.88 mM) in a cuvette with 1-mm pathlength. The arrow indicates the direction of a bathochromic shift. There is a diagnostic window of representative fit exported from BindFit.

| $c$ ( <b>8a</b> ) mM | $c$ (Cl <sup>-</sup> ) mM | $\delta_{\text{NH}}$ (ppm) |
|----------------------|---------------------------|----------------------------|
| 5.85                 | 0                         | 9.5559                     |
| 5.85                 | 3.55                      | 9.7047                     |
| 5.85                 | 6.97                      | 9.8449                     |
| 5.85                 | 10.3                      | 9.9711                     |
| 5.85                 | 16.5                      | 10.1512                    |
| 5.85                 | 22.3                      | 10.2839                    |
| 5.85                 | 30.2                      | 10.4275                    |
| 5.85                 | 41.8                      | 10.5931                    |
| 5.85                 | 51.8                      | 10.7029                    |
| 5.85                 | 68.0                      | 10.8422                    |
| 5.85                 | 87.8                      | 10.9573                    |
| 5.85                 | 181                       | 11.2648                    |

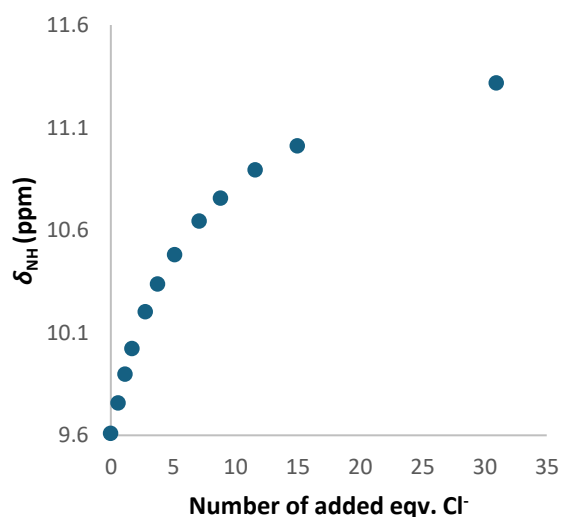

Link:

<http://app.supramolecular.org/bindfit/view/21850989-9fe4-4348-a105-814e830ff6c1>

| $c$ ( <b>8a</b> ) mM | $c$ (HSO <sub>4</sub> <sup>-</sup> ) mM | $\delta_{\text{NH}}$ (ppm) |
|----------------------|-----------------------------------------|----------------------------|
| 7.18                 | 0                                       | 9.5555                     |
| 7.18                 | 3.24                                    | 9.5676                     |
| 7.18                 | 6.36                                    | 9.5789                     |
| 7.18                 | 9.36                                    | 9.5883                     |
| 7.18                 | 15.0                                    | 9.6032                     |
| 7.18                 | 20.3                                    | 9.6157                     |
| 7.18                 | 27.5                                    | 9.6322                     |
| 7.18                 | 38.1                                    | 9.6491                     |
| 7.18                 | 47.2                                    | 9.6674                     |
| 7.18                 | 62.0                                    | 9.6859                     |
| 7.18                 | 73.5                                    | 9.6995                     |
| 7.18                 | 81.0                                    | 9.7202                     |
| 7.18                 | 165                                     | 9.8060                     |

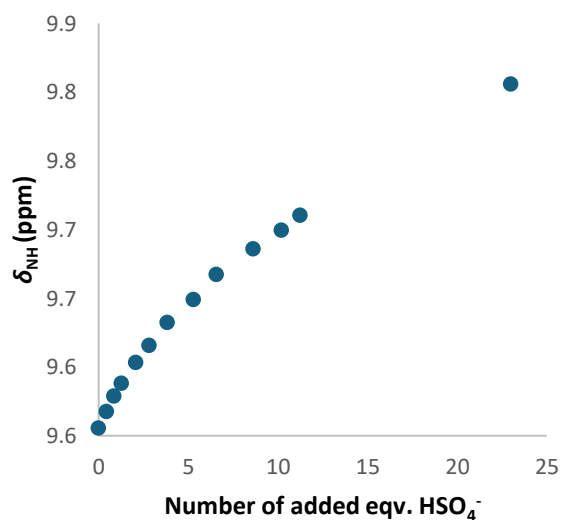

Link:

<http://app.supramolecular.org/bindfit/view/c7d6567f-0cfe-4084-904b-0d9162ea38c4>

| $c$ ( <b>9</b> ) mM | $c$ ( $\text{H}_2\text{PO}_4^-$ ) mM | $A_{390}$ (A.U.) |
|---------------------|--------------------------------------|------------------|
| 0.210               | 0.000                                | 0.399            |
| 0.210               | 0.0642                               | 0.409            |
| 0.210               | 0.127                                | 0.421            |
| 0.210               | 0.189                                | 0.433            |
| 0.210               | 0.309                                | 0.449            |
| 0.210               | 0.424                                | 0.462            |
| 0.210               | 0.589                                | 0.474            |
| 0.210               | 0.845                                | 0.489            |
| 0.210               | 1.08                                 | 0.500            |
| 0.210               | 1.50                                 | 0.512            |
| 0.210               | 1.85                                 | 0.519            |
| 0.210               | 2.01                                 | 0.523            |

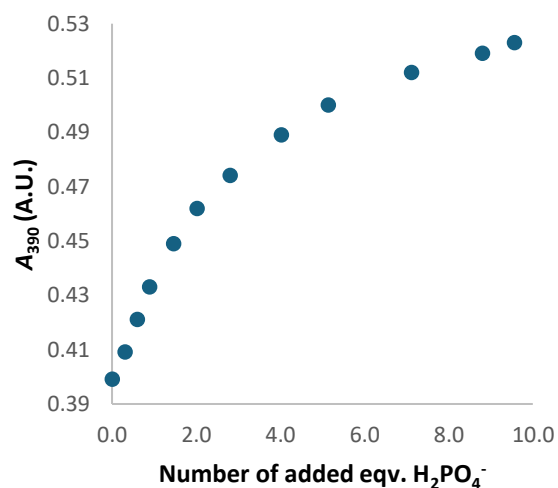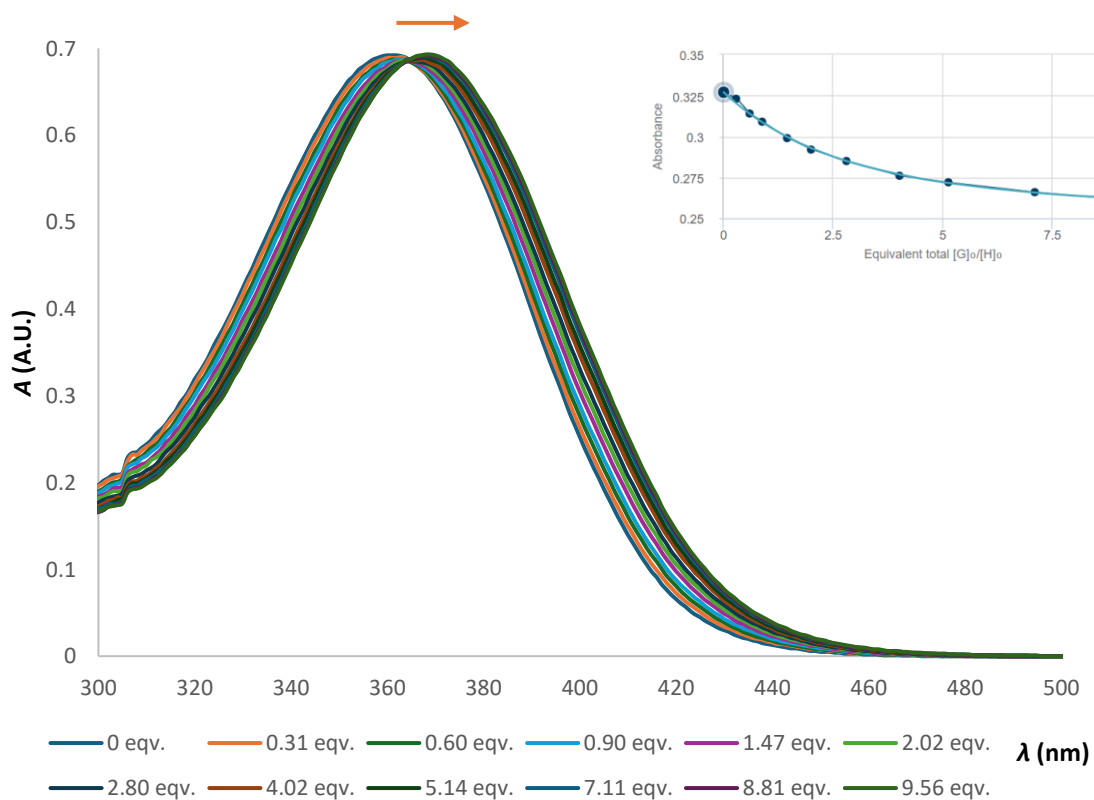

**Fig. S52:** Records of UV-Vis obtained for nitro substituted urea receptor **9** (0.21 mM in DMSO) titrated with  $\text{TBAH}_2\text{PO}_4$  (final concentration 2.01 mM) in a cuvette with 1-mm pathlength. The arrow indicates the direction of a bathochromic shift.



## 6. Electrochemistry

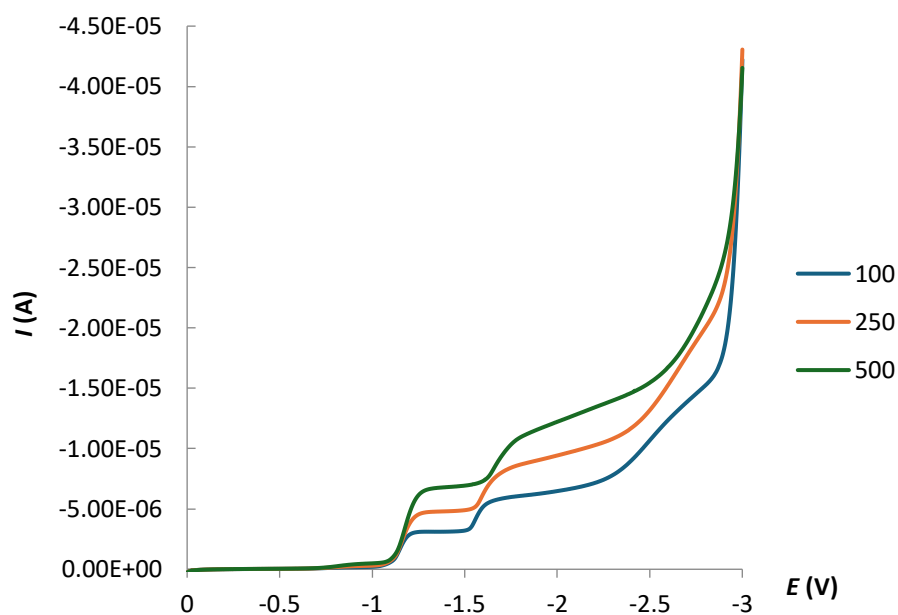

**Fig. S53:** Linear sweep voltammetry of receptor **4** ( $1.1 \cdot 10^{-3}$  M) in DMSO (0.1 M TBAPF<sub>6</sub>) (W = RDE = glassy carbon -  $\varnothing$  1 mm, Ref = SCE, Aux = Pt) was recorded with a scan rate of  $10 \text{ mV} \cdot \text{s}^{-1}$  using several rotating rates.

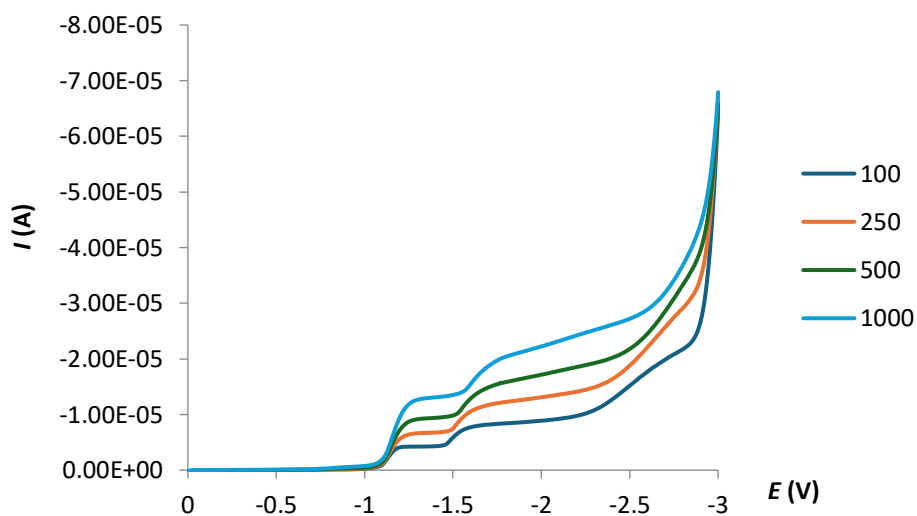

**Fig. S54:** Linear sweep voltammetry of **7a** ( $8.6 \cdot 10^{-4}$  M) in DMSO (0.1 M TBAPF<sub>6</sub>) (W = RDE = glassy carbon -  $\varnothing$  1 mm, Ref = SCE, Aux = Pt) was recorded with a scan rate of  $10 \text{ mV} \cdot \text{s}^{-1}$  using several rotating rates.

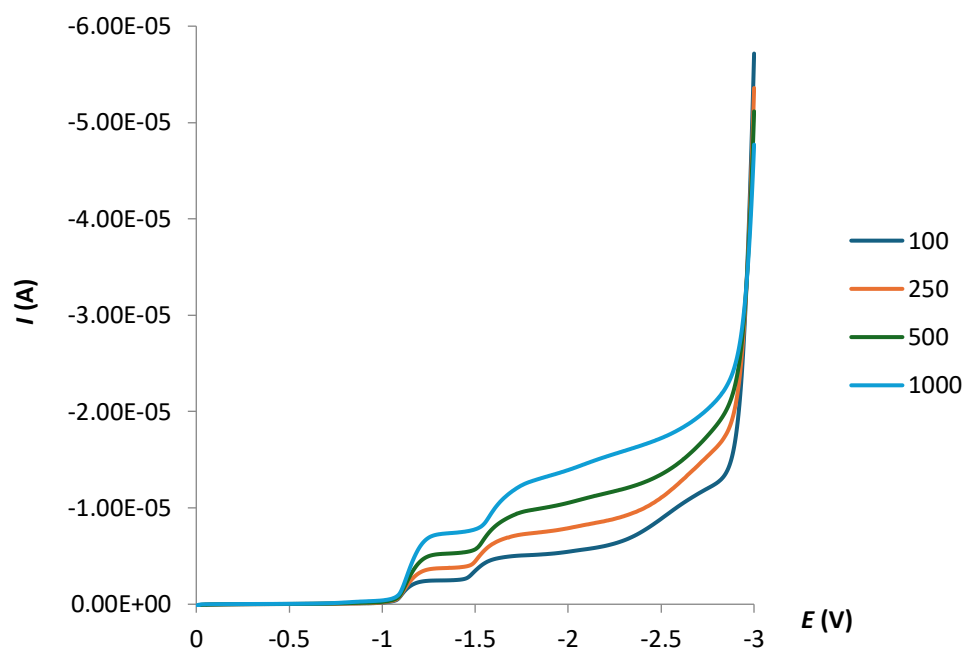

**Fig. S55:** Linear sweep voltammetry of **8a** ( $4.9 \cdot 10^{-4}$  M) in DMSO (0.1 M TBAPF<sub>6</sub>) (W = RDE = glassy carbon -  $\varnothing$  1 mm, Ref = SCE, Aux = Pt) was recorded with a scan rate of  $10 \text{ mV} \cdot \text{s}^{-1}$  using several rotating rates.

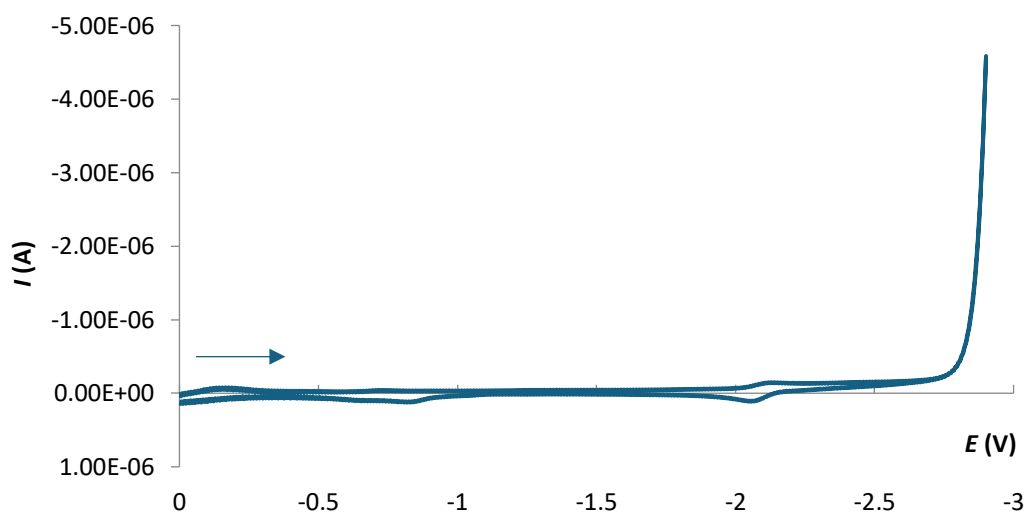

**Fig. S56:** Cyclic voltammogram (W = HMDE) of typical blank of DMSO (0.1 M TBAPF<sub>6</sub>) with scan rate  $100 \text{ mV} \cdot \text{s}^{-1}$  (gradually increasing potential range).

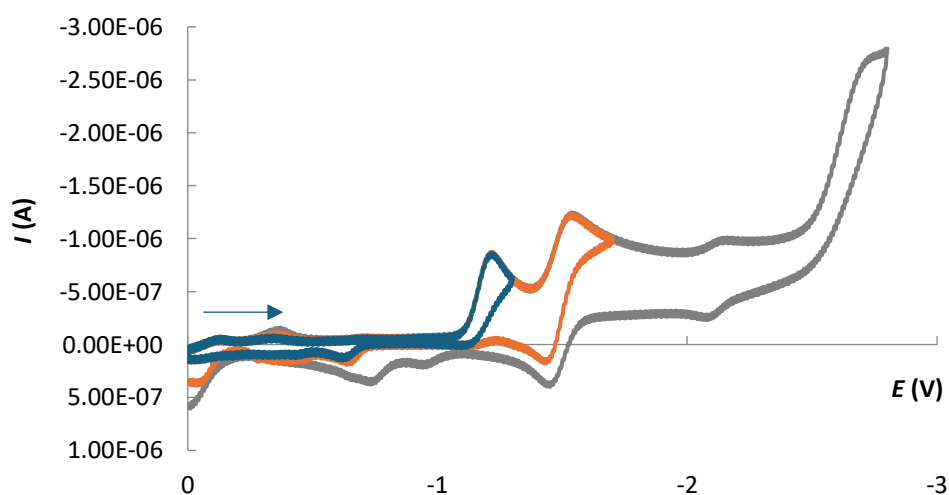

**Fig. S57:** Cyclic voltammogram ( $W = \text{HMDE}$ ) of compound **3a** ( $8.9 \cdot 10^{-4} \text{ M}$ ) in DMSO ( $0.1 \text{ M}$   $\text{TBAPF}_6$ ) with scan rate  $100 \text{ mV} \cdot \text{s}^{-1}$  (gradually increasing potential range).

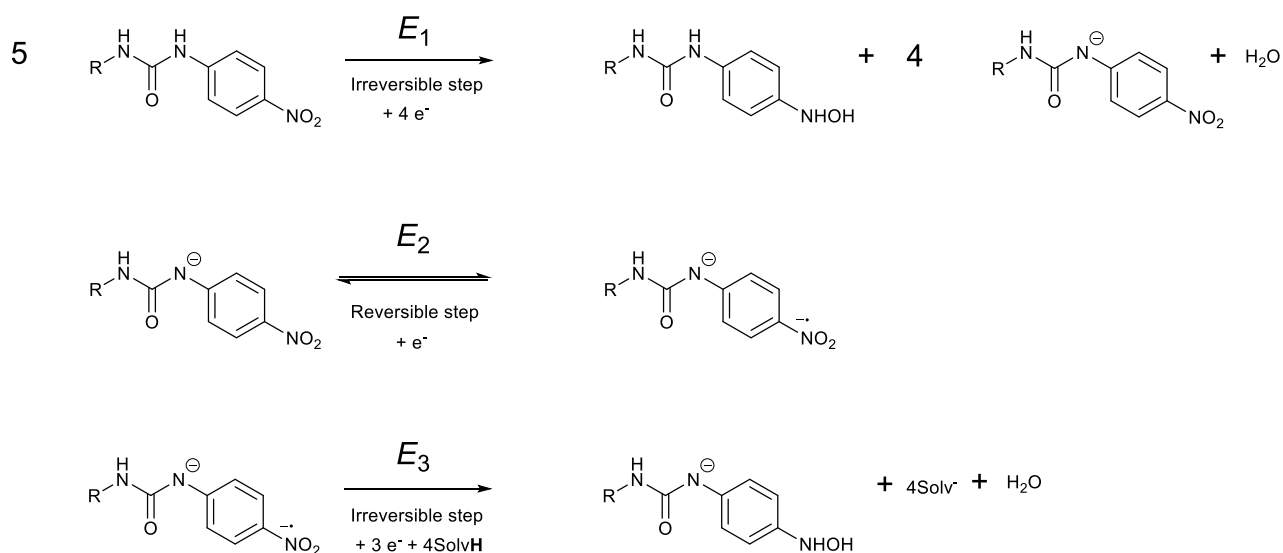

**Scheme S58:** Self-protonation reduction mechanism describing the reduction of nitro derivatives. The potentials of three reduction steps might be obtained from the cyclic voltammogram above (e.g. Fig. S57).

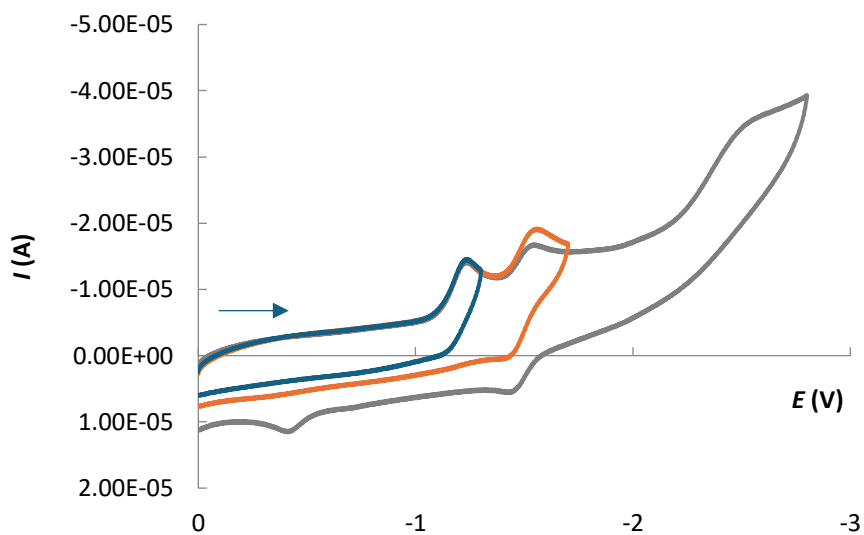

**Fig. S59:** Cyclic voltammogram ( $W = \text{GC}$ ) of compound **3a** ( $8.9 \cdot 10^{-4} \text{ M}$ ) in DMSO ( $0.1 \text{ M TBAPF}_6$ ) with scan rate  $200 \text{ mV} \cdot \text{s}^{-1}$  (gradually increasing potential range).

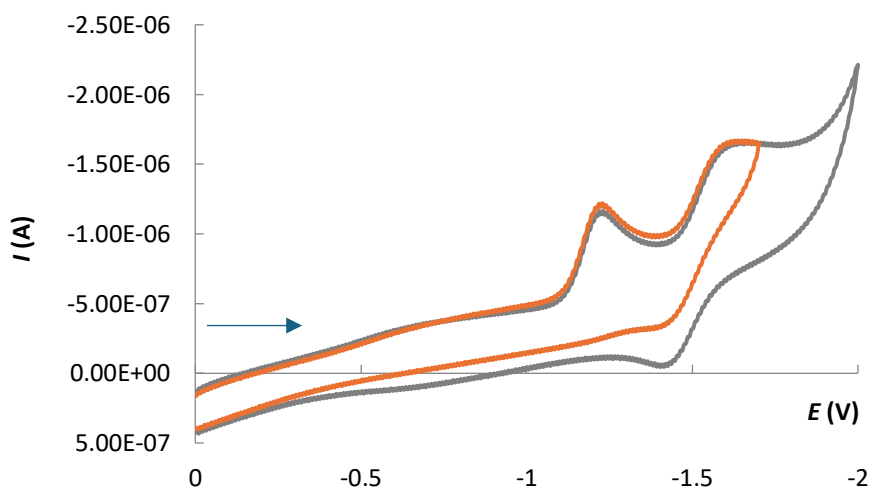

**Fig. S60:** Cyclic voltammogram ( $W = \text{Pt}$ ) of compound **3a** ( $8.9 \cdot 10^{-4} \text{ M}$ ) in DMSO ( $0.1 \text{ M TBAPF}_6$ ) with scan rate  $100 \text{ mV} \cdot \text{s}^{-1}$  (gradually increasing potential range).

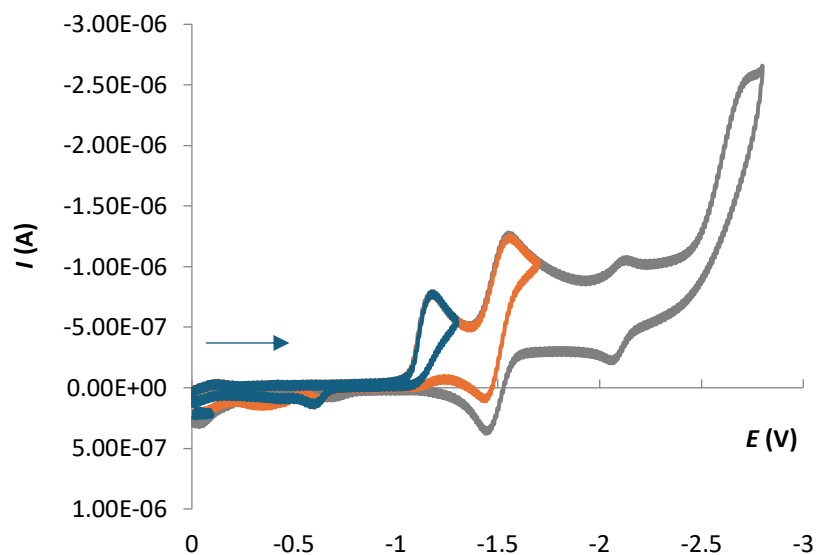

**Fig. S61:** Cyclic voltammogram ( $W = \text{HMDE}$ ) of compound **4** ( $1.1 \cdot 10^{-3} \text{ M}$ ) in DMSO ( $0.1 \text{ M TBAPF}_6$ ) with scan rate  $100 \text{ mV} \cdot \text{s}^{-1}$  (gradually increasing potential range).

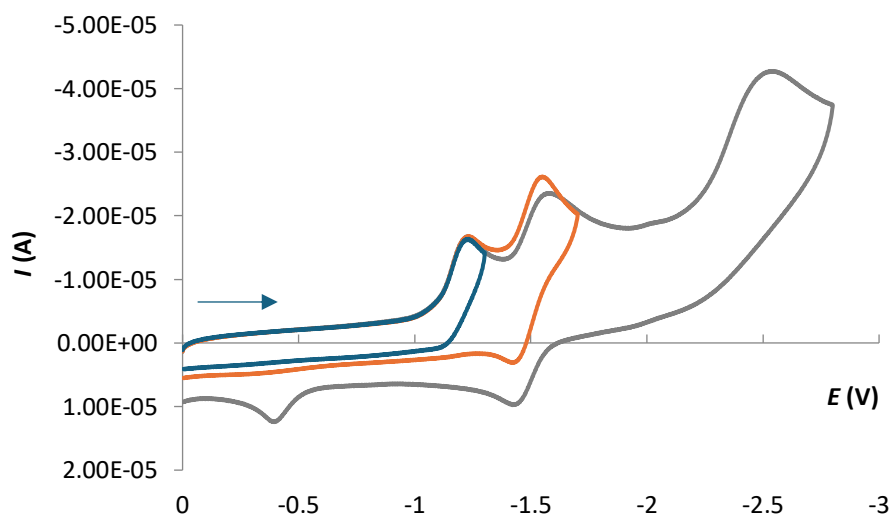

**Fig. S62:** Cyclic voltammogram ( $W = \text{GC}$ ) of compound **4** ( $1.1 \cdot 10^{-3} \text{ M}$ ) in DMSO ( $0.1 \text{ M TBAPF}_6$ ) with scan rate  $200 \text{ mV} \cdot \text{s}^{-1}$  (gradually increasing potential range).

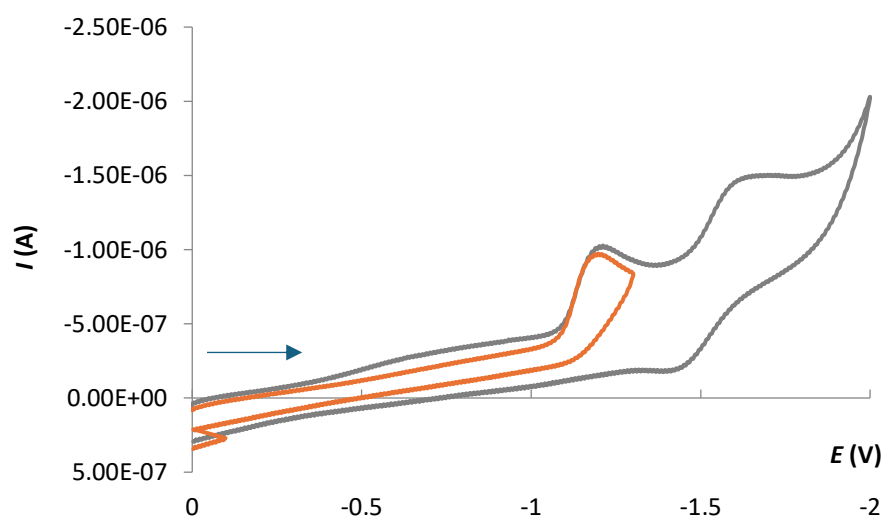

**Fig. S63:** Cyclic voltammogram ( $W = \text{Pt}$ ) of compound **4** ( $1.1 \cdot 10^{-3}$  M) in DMSO (0.1 M TBAPF<sub>6</sub>) with scan rate  $100 \text{ mV} \cdot \text{s}^{-1}$  (gradually increasing potential range).

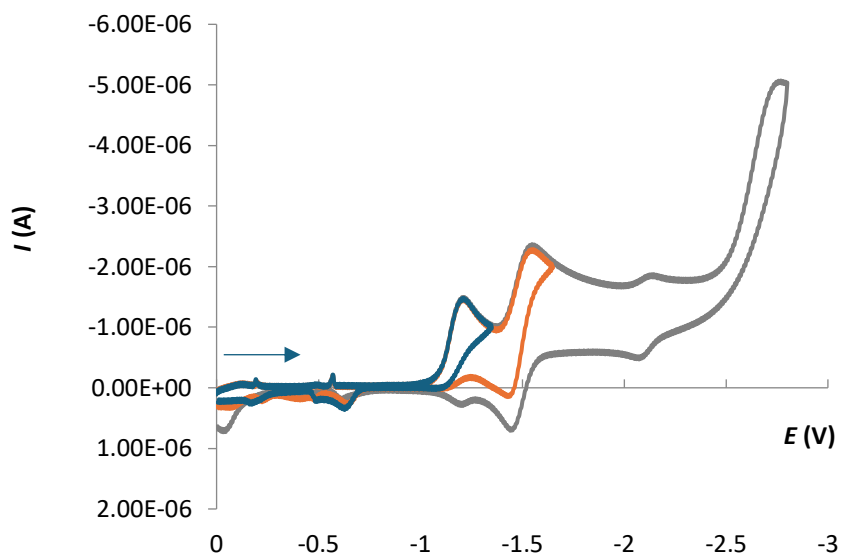

**Fig. S64:** Cyclic voltammogram (W = HMDE) of compound **7a** ( $8.6 \cdot 10^{-4}$  M) in DMSO (0.1 M TBAPF<sub>6</sub>) with scan rate  $100 \text{ mV} \cdot \text{s}^{-1}$  (gradually increasing potential range).

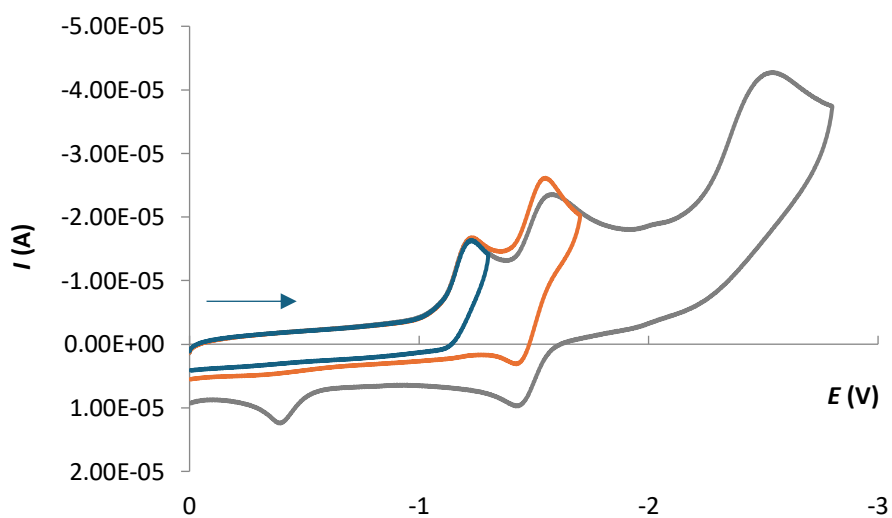

**Fig. S65:** Cyclic voltammogram (W = GC) of compound **7a** ( $8.6 \cdot 10^{-4}$  M) in DMSO (0.1 M TBAPF<sub>6</sub>) with scan rate  $200 \text{ mV} \cdot \text{s}^{-1}$  (gradually increasing potential range).

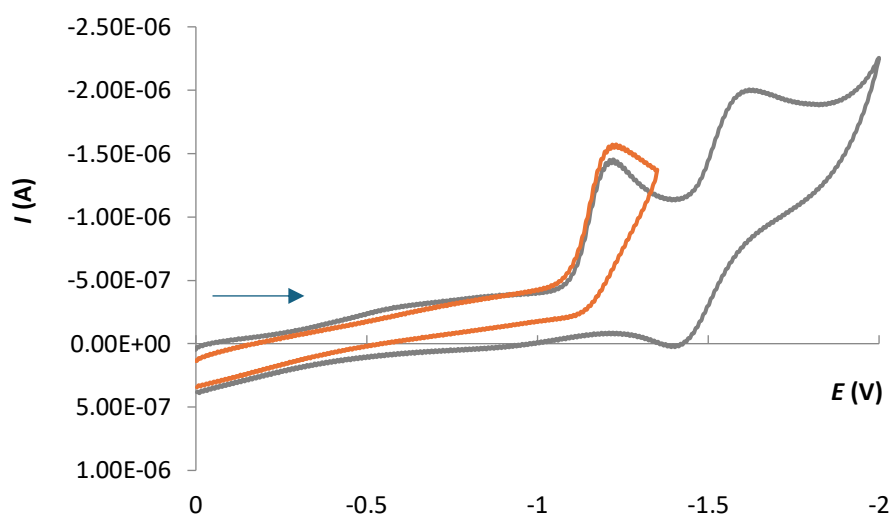

**Fig. S66:** Cyclic voltammogram ( $W = \text{Pt}$ ) of compound **7a** ( $8.6 \cdot 10^{-4}$  M) in DMSO (0.1 M TBAPF<sub>6</sub>) with scan rate  $100 \text{ mV} \cdot \text{s}^{-1}$  (gradually increasing potential range).



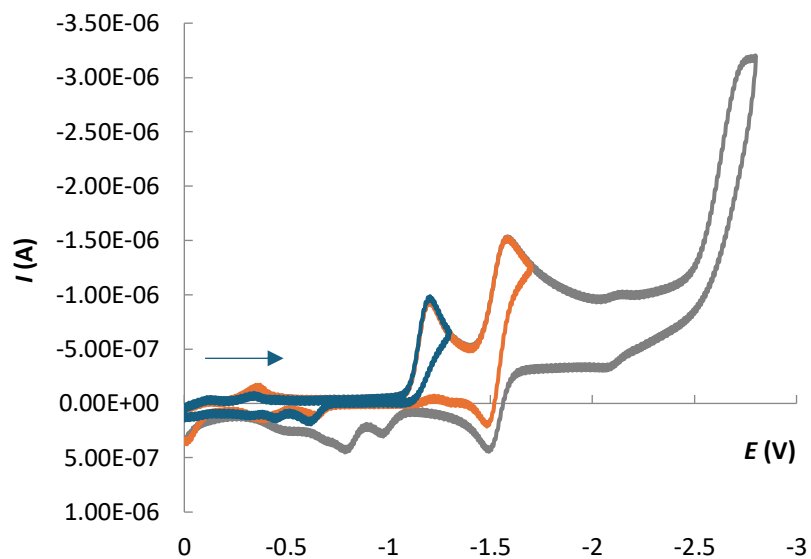

**Fig. S67:** Cyclic voltammogram ( $W = \text{HMDE}$ ) of compound **8a** ( $4.9 \cdot 10^{-4} \text{ M}$ ) in DMSO ( $0.1 \text{ M TBAPF}_6$ ) with scan rate  $100 \text{ mV} \cdot \text{s}^{-1}$  (gradually increasing potential range).

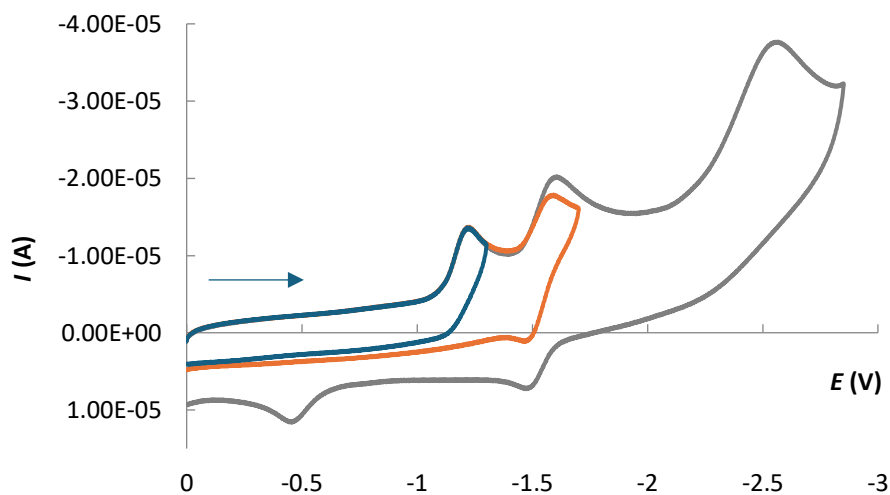

**Fig. S68:** Cyclic voltammogram ( $W = \text{GC}$ ) of compound **8a** ( $4.9 \cdot 10^{-4} \text{ M}$ ) in DMSO ( $0.1 \text{ M TBAPF}_6$ ) with scan rate  $200 \text{ mV} \cdot \text{s}^{-1}$  (gradually increasing potential range).

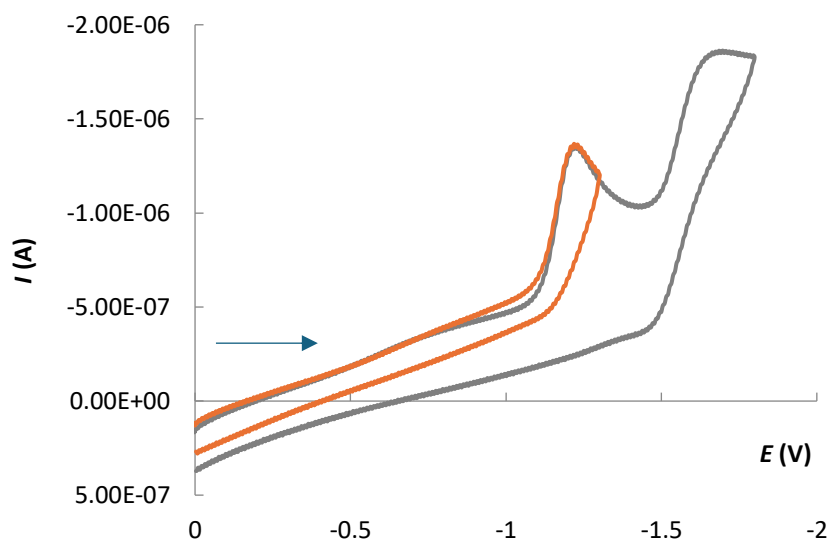

**Fig. S69:** Cyclic voltammogram ( $W = \text{Pt}$ ) of compound **8a** ( $4.9 \cdot 10^{-4}$  M) in DMSO (0.1 M TBAPF<sub>6</sub>) with scan rate  $100 \text{ mV} \cdot \text{s}^{-1}$  (gradually increasing potential range).

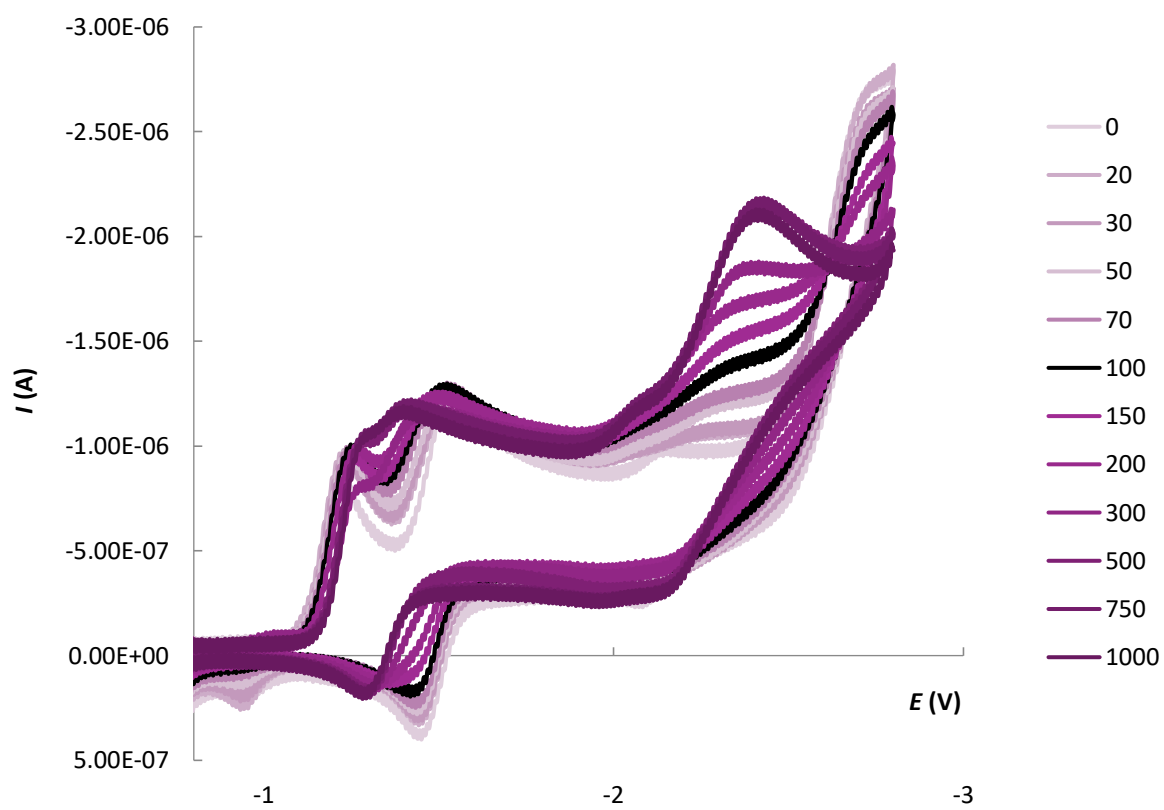

**Fig. S70:** Titration of **3a** ( $8.9 \cdot 10^{-4}$  M) by TBAH<sub>2</sub>PO<sub>4</sub> (final concentration 9.41 mM) in DMSO (0.1M TBAH<sub>2</sub>PF<sub>6</sub>) monitored by CV (W = HMDE) with scan rate 100 mV·s<sup>-1</sup>; black - with 1 molar equiv. of H<sub>2</sub>PO<sub>4</sub><sup>-</sup>.

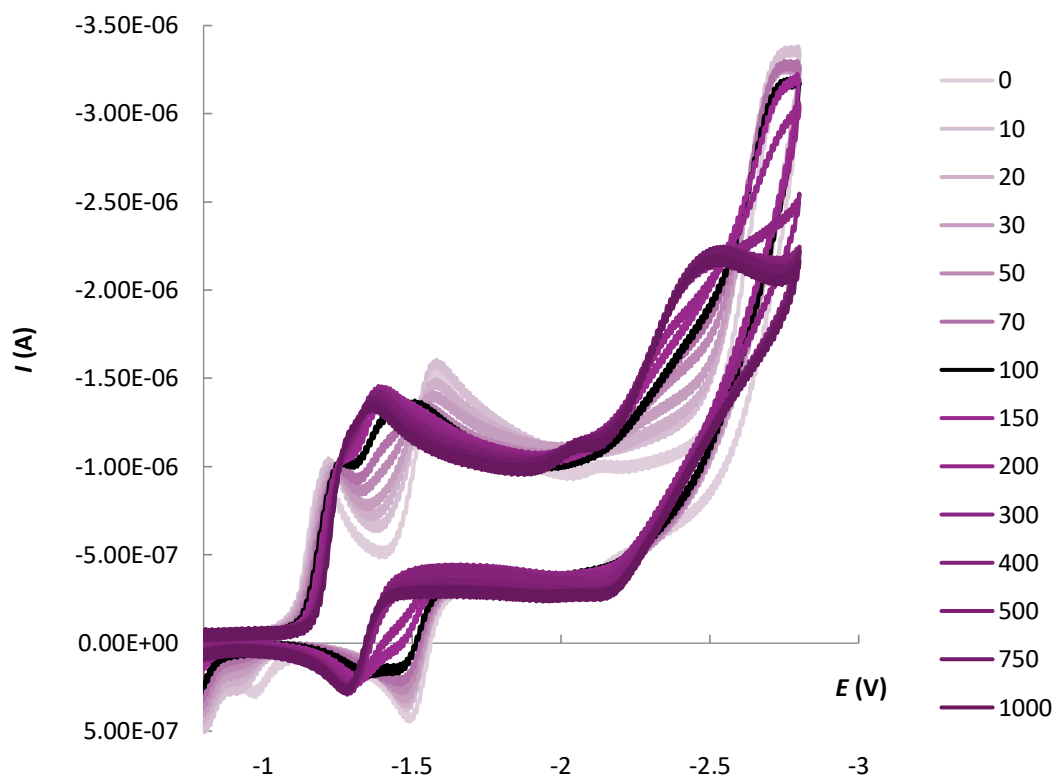

**Fig. S71:** Titration of **4** ( $1.1 \cdot 10^{-3}$  M) by TBAH<sub>2</sub>PO<sub>4</sub> (final concentration 11.8 mM) in DMSO (0.1M TBAHFPF) monitored by CV (W = HMDE) with scan rate  $100 \text{ mV} \cdot \text{s}^{-1}$ ; black - with 1 molar equiv. of H<sub>2</sub>PO<sub>4</sub><sup>-</sup>.

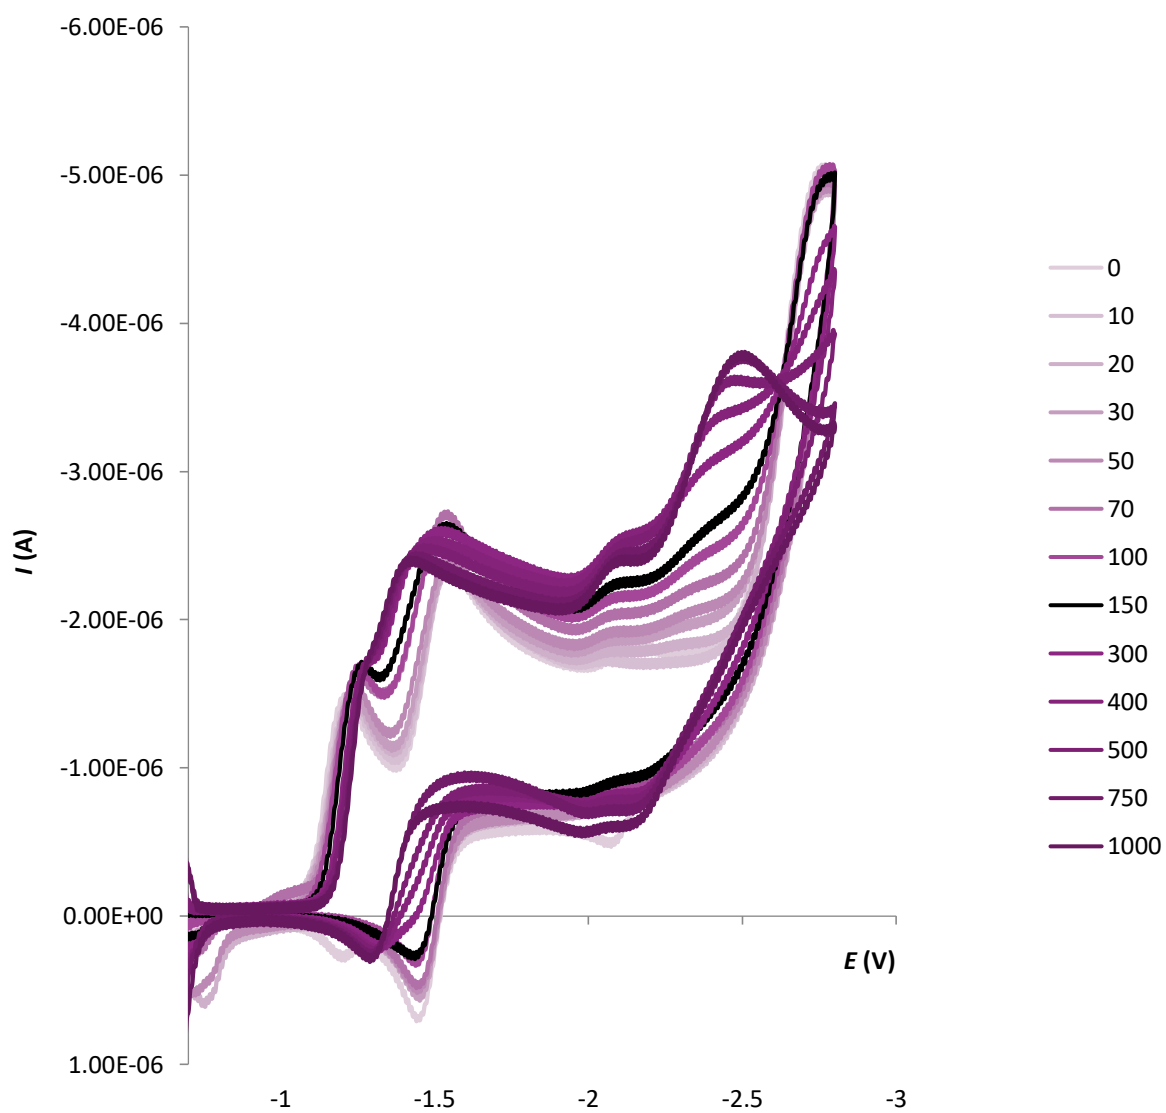

**Fig. S72:** Titration of **8a** ( $8.6 \cdot 10^{-4}$  M) by  $\text{TBAH}_2\text{PO}_4$  (final concentration 11.7 mM) in DMSO (0.1M TBAHFPF) monitored by CV (W = HMDE) with scan rate  $100 \text{ mV} \cdot \text{s}^{-1}$ ; black - with 2 molar equiv. of  $\text{H}_2\text{PO}_4^-$ .

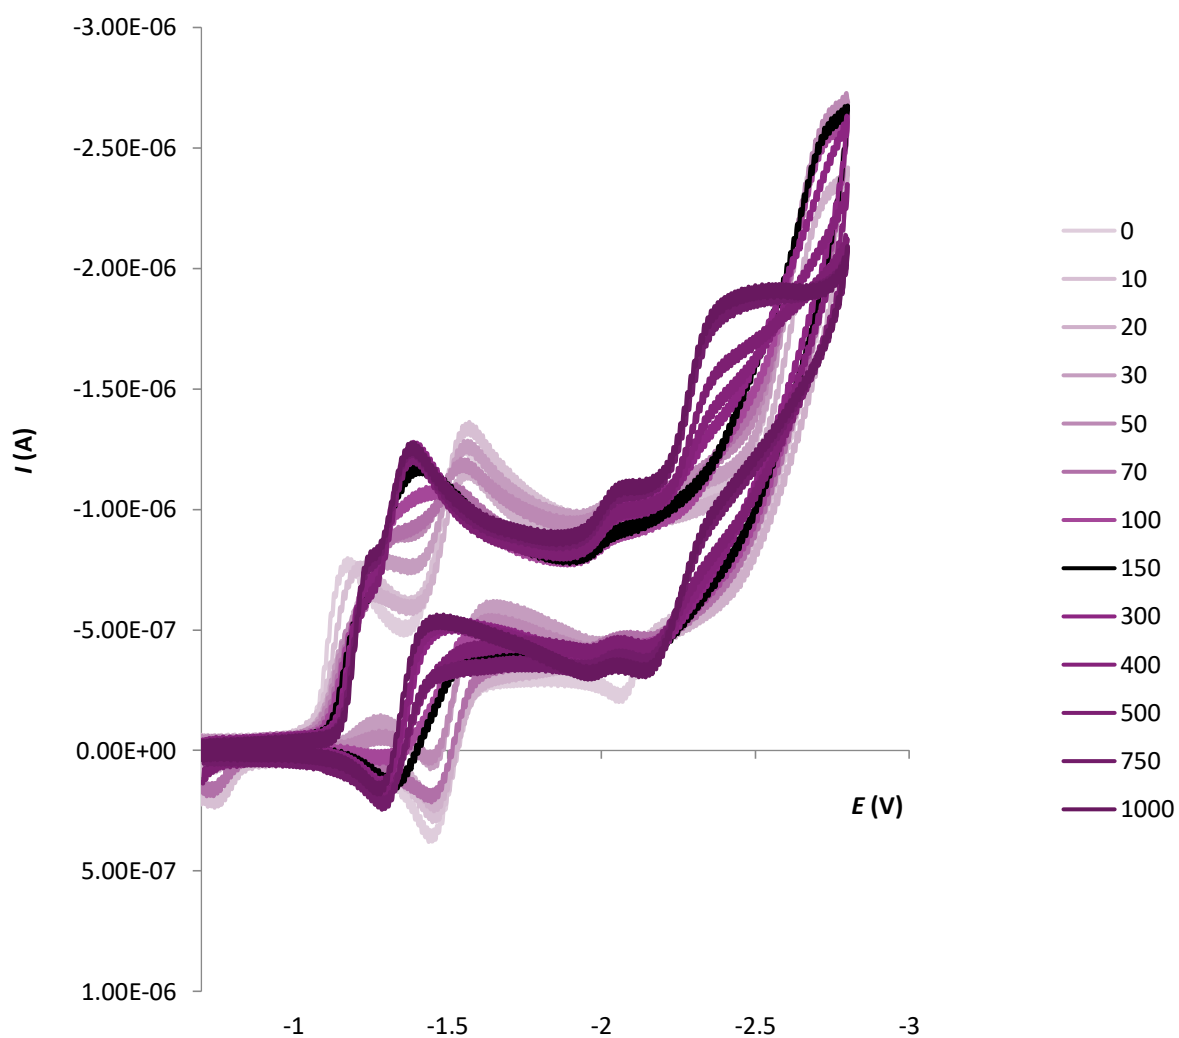

**Fig. S73:** Titration of **8a** ( $4.9 \cdot 10^{-4}$  M) by TBAH<sub>2</sub>PO<sub>4</sub> (final concentration 5.89 mM) in DMSO (0.1M TBAHPPF) monitored by CV (W = HMDE) with scan rate 100 mV·s<sup>-1</sup>; black - with 2 molar equiv. of H<sub>2</sub>PO<sub>4</sub><sup>-</sup>.

## 7. Crystallographic data

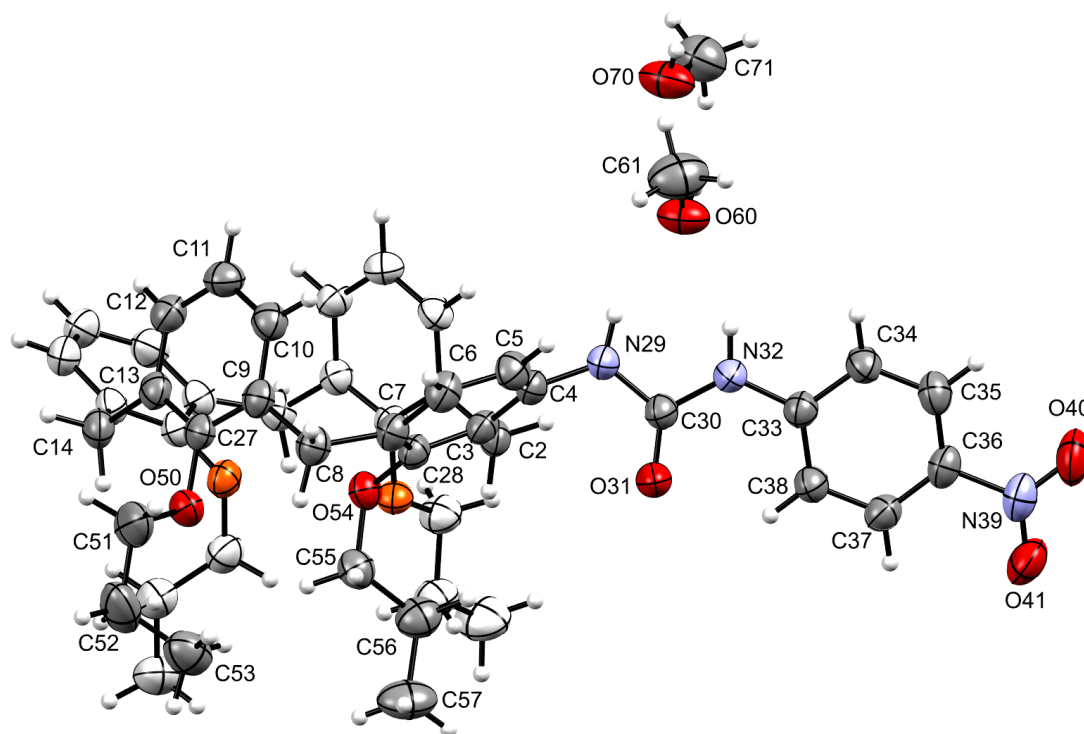

**Fig. S74:** Thermal ellipsoid plot (50% probability level) of compound **3a**.

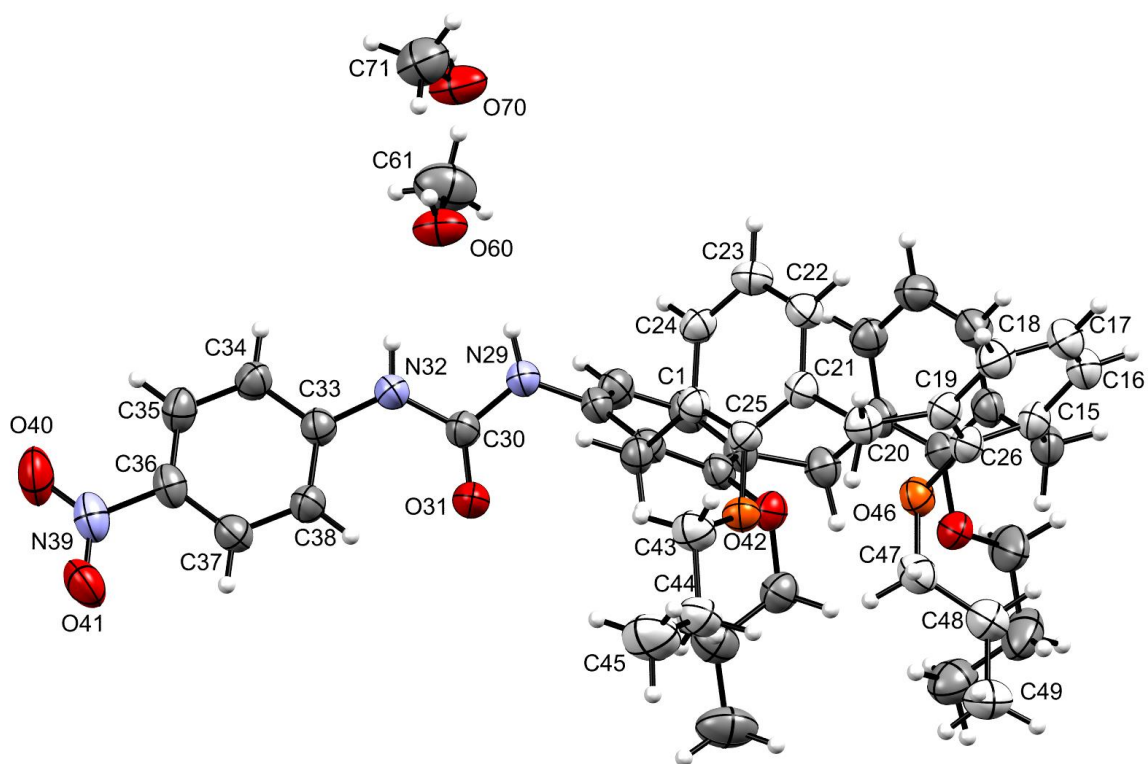

**Fig. S75:** Thermal ellipsoid plot (50% probability level) of compound **3a** - view from the opposite side (180° rotation).
